# Supplementary material for: Comparative analysis of Hox downstream genes inDrosophila
Source: Oxford University Press journal article supplement (doi:10.1242/dev.02746), 2006-12-14
Supplement: dev02746tables1-6.pdf [file dev02746tables1-6.pdf]

Table S1. Genes responsive to Dfd induction

| Up-regulated genes: |                           |            |           |                                                                                                                                                                                                         |                  |              |                  |              |
|---------------------|---------------------------|------------|-----------|---------------------------------------------------------------------------------------------------------------------------------------------------------------------------------------------------------|------------------|--------------|------------------|--------------|
| FB code             | Affy identifier           | CG numbers | Synonyms  | Description / Molecular function                                                                                                                                                                        | Fold change st11 | t-value st11 | Fold change st12 | t-value st12 |
| FBgn0000459         | 143124_at                 | CG9908     | disco     | transcription factor activity                                                                                                                                                                           | 2,0              | 4,357        | -                | -            |
| FBgn0001149         | 143184_at                 | CG10045    | GstD1     | glutathione transferase activity                                                                                                                                                                        | -                | -            | 1,6              | 4,5365       |
| FBgn0001150         | 143185_at                 | CG7952     | qt        | transcription factor activity                                                                                                                                                                           | 3,1              | 5,5872       | -                | -            |
| FBgn0001230         | 143197_at                 | CG5436     | Hsp68     | unfolded protein binding                                                                                                                                                                                | 2,0              | 3,3471       | -                | -            |
| FBgn0003145         | 152870_at                 | CG6716     | prd       | DNA binding / specific RNA polymerase II transcription factor activity                                                                                                                                  | 2,2              | 3,6241       | -                | -            |
| FBgn0003308         | 152200_at                 | CG7642     | ry        | xanthine dehydrogenase activity                                                                                                                                                                         | -                | -            | 2,5              | 3,0341       |
| FBgn0004228         | 143441_at                 | CG7936     | mex1      | -                                                                                                                                                                                                       | -                | -            | 1,5              | 3,3205       |
| FBgn0004898         | 143532_at                 | CG11932    | fd96Cb    | transcription factor activity                                                                                                                                                                           | 2,1              | 4,3416       | 2,2              | 3,6725       |
| FBgn0010222         | 151767_at                 | CG18466    | Nmdmc     | magnesium ion binding                                                                                                                                                                                   | -                | -            | 1,9              | 4,6204       |
| FBgn0011706         | 143680_at                 | CG4319     | rpr       | -                                                                                                                                                                                                       | 3,8              | 8,8962       | 2,6              | 4,4461       |
| FBgn0011722         | 143682_at                 | CG11527    | trig      | binding                                                                                                                                                                                                 | 2,8              | 4,8534       | 1,9              | 4,3389       |
| FBgn0011746         | 152113_at                 | CG8084     | ana       | -                                                                                                                                                                                                       | 2,6              | 7,0658       | 2,2              | 4,199        |
| FBgn0012037         | 153728_at                 | CG8827     | Ance      | peptidyl-dipeptidase A activity / zinc ion binding                                                                                                                                                      | 2,6              | 5,9401       | 2,0              | 5,0729       |
| FBgn0013772         | 142189_at                 | CG10248    | Cyp6a8    | electron transporter activity / oxidoreductase activity                                                                                                                                                 | 1,6              | 3,0542       | -                | -            |
| FBgn0014011         | 153313_at                 | CG8556     | Rac2      | GTPase activity                                                                                                                                                                                         | -                | -            | 2,8              | 5,6701       |
| FBgn0025454         | 152900_at                 | CG8453     | Cyp6g1    | electron transporter activity / oxidoreductase activity                                                                                                                                                 | -                | -            | 1,6              | 3,4751       |
| FBgn0027610         | 151853_at                 | CG8790     | -         | carrier activity / dicarboxylic acid transporter activity                                                                                                                                               | 2,6              | 6,3211       | -                | -            |
| FBgn0028469         | 154424_at                 | CG8062     | -         | monocarboxylic acid transporter activity                                                                                                                                                                | 1,6              | 3,8268       | -                | -            |
| FBgn0028519         | 154426_at                 | CG4500     | -         | long-chain-fatty-acid-CoA ligase activity                                                                                                                                                               | -                | -            | 2,1              | 5,9299       |
| FBgn0029531         | 144348_at                 | CG13362    | -         | -                                                                                                                                                                                                       | -                | -            | 2,6              | 3,1967       |
| FBgn0030187         | 154819_at                 | CG2961     | Ipod      | -                                                                                                                                                                                                       | -                | -            | 1,8              | 2,868        |
| FBgn0030390         | 144937_at                 | CG15731    | -         | -                                                                                                                                                                                                       | -                | -            | 1,7              | 3,0235       |
| FBgn0030576         | 145075_at                 | CG15890    | -         | -                                                                                                                                                                                                       | 2,8              | 11,3649      | 3,2              | 6,472        |
| FBgn0031000         | 145357_at                 | CG7876     | -         | -                                                                                                                                                                                                       | -                | -            | 1,9              | 4,1808       |
| FBgn0031313         | 154669_at                 | CG5080     | -         | -                                                                                                                                                                                                       | -                | -            | 1,5              | 2,9116       |
| FBgn0031908         | 153932_at                 | CG5177     | -         | trehalose-phosphatase activity                                                                                                                                                                          | -                | -            | 2,9              | 3,4936       |
| FBgn0031938         | 145976_s_at               | CG13796    | -         | glycine transporter activity / structural constituent of adult cuticle (sensu Insecta)                                                                                                                  | -                | -            | 2,2              | 3,4821       |
| FBgn0032213         | 146138_at                 | CG5390     | -         | NOT serine-type endopeptidase activity                                                                                                                                                                  | 1,6              | 3,651        | 1,9              | 3,244        |
| FBgn0032253         | 146162_at                 | CG5322     | -         | alpha-mannosidase activity / hydrolase activity, hydrolyzing N-glycosyl compounds                                                                                                                       | 1,6              | 2,972        | 1,9              | 6,39         |
| FBgn0032264         | 146165_at                 | CG6113     | -         | triacylglycerol lipase activity                                                                                                                                                                         | 2,1              | 2,9728       | 2,6              | 5,6124       |
| FBgn0032283         | 146182_at                 | CG7296     | -         | -                                                                                                                                                                                                       | 1,6              | 3,3761       | -                | -            |
| FBgn0032284         | 146183_at                 | CG7294     | -         | -                                                                                                                                                                                                       | -                | -            | 2,5              | 3,7858       |
| FBgn0032681         | 141280_at                 | CG10283    | -         | -                                                                                                                                                                                                       | -                | -            | 2,2              | 2,8042       |
| FBgn0032774         | 152759_at                 | CG17549    | -         | -                                                                                                                                                                                                       | -                | -            | 2,4              | 5,7145       |
| FBgn0033204         | 146757_at                 | CG2065     | -         | oxidoreductase activity                                                                                                                                                                                 | -                | -            | 1,5              | 3,0603       |
| FBgn0033437         | 146898_at                 | CG12926    | -         | carrier activity / tocopherol binding                                                                                                                                                                   | -                | -            | 2,2              | 7,4323       |
| FBgn0033456         | 153430_at                 | CG10536    | cbx       | -                                                                                                                                                                                                       | -                | -            | 2,6              | 4,9623       |
| FBgn0033518         | 146946_s_at               | CG11765    | Prx2540-2 | antioxidant activity / antioxidant activity / non-selenium glutathione peroxidase activity / peroxidase activity / peroxidase activity / peroxidase activity                                            | 2,1              | 5,9781       | -                | -            |
| FBgn0033614         | 147010_at                 | CG13208    | Obp47b    | -                                                                                                                                                                                                       | -                | -            | 1,7              | 3,8374       |
| FBgn0033788         | 147126_i_at               | CG13323    | -         | -                                                                                                                                                                                                       | -                | -            | 1,6              | 3,663        |
| FBgn0034190         | 141536_at                 | CG8946     | Sply      | -                                                                                                                                                                                                       | -                | -            | 1,5              | 4,2441       |
| FBgn0034200         | 152591_at                 | CG11395    | -         | -                                                                                                                                                                                                       | 1,6              | 3,9247       | 3,0              | 4,5836       |
| FBgn0034227         | 147367_at                 | CG18431    | -         | -                                                                                                                                                                                                       | -                | -            | 1,6              | 3,1572       |
| FBgn0034301         | 147413_at                 | CG5756     | -         | -                                                                                                                                                                                                       | -                | -            | 2,0              | 5,1381       |
| FBgn0034468         | 147514_at                 | CG11797    | Obp56a    | -                                                                                                                                                                                                       | -                | -            | 2,1              | 4,5431       |
| FBgn0034736         | 147681_at                 | CG6018     | -         | carboxylesterase activity                                                                                                                                                                               | -                | -            | 1,6              | 3,1572       |
| FBgn0035077         | 154985_at                 | CG9083     | -         | -                                                                                                                                                                                                       | -                | -            | 2,0              | 5,1381       |
| FBgn0035089         | 147903_at                 | CG9358     | Phk-3     | -                                                                                                                                                                                                       | -                | -            | 2,1              | 4,5431       |
| FBgn0035347         | 141711_at                 | CG33232    | -         | actin binding / structural constituent of cytoskeleton                                                                                                                                                  | -                | -            | 1,6              | 2,8301       |
| FBgn0035539         | 153881_at                 | CG7447     | -         | -                                                                                                                                                                                                       | 2,3              | 3,185        | 1,9              | 4,1811       |
| FBgn0035638         | 148236_at                 | CG10541    | Tektin-C  | -                                                                                                                                                                                                       | 5,6              | 7,2903       | 8,0              | 10,754       |
| FBgn0035717         | 152709_at                 | CG10078    | Prat2     | -                                                                                                                                                                                                       | -                | -            | 2,6              | 6,7826       |
| FBgn0035736         | 148302_at                 | CG8638     | -         | structural constituent of cuticle (sensu Insecta)                                                                                                                                                       | -                | -            | 3,4              | 5,7177       |
| FBgn0035798         | 154595_at                 | CG7526     | -         | kinase activity / protein kinase activity / receptor activity / structural molecule activity / transmembrane receptor protein kinase activity / transmembrane receptor protein tyrosine kinase activity | -                | -            | 1,7              | 3,4352       |
| FBgn0035860         | 151948_at                 | CG8023     | -         | RNA cap binding / translation initiation factor activity                                                                                                                                                | 2,5              | 2,8568       | 6,1              | 4,5699       |
| FBgn0035882         | 148396_f_at               | CG13666    | mam       | -                                                                                                                                                                                                       | 1,6              | 3,0458       | -                | -            |
| FBgn0036151         | 154125_at                 | CG7590     | scyl      | -                                                                                                                                                                                                       | 1,7              | 3,363        | -                | -            |
| FBgn0036208         | 148605_at                 | CG10361    | -         | glycine C-acetyltransferase activity / transaminase activity                                                                                                                                            | -                | -            | 2,3              | 4,0423       |
| FBgn0036572         | 154763_at                 | CG5165     | Pgm       | -                                                                                                                                                                                                       | -                | -            | 2,0              | 4,5099       |
| FBgn0036663         | 153030_at                 | CG9674     | -         | -                                                                                                                                                                                                       | 1,7              | 3,4371       | 1,7              | 4,6458       |
| FBgn0036678         | 142769_at                 | CG11905    | -         | -                                                                                                                                                                                                       | -                | -            | 1,5              | 4,1721       |
| FBgn0036786         | 148994_at                 | CG13701    | skl       | -                                                                                                                                                                                                       | 1,6              | 2,8394       | -                | -            |
| FBgn0037227         | 149271_at                 | CG14640    | -         | -                                                                                                                                                                                                       | -                | -            | 2,0              | 6,4728       |
| FBgn0037513         | 153777_at                 | CG3027     | pyd3      | -                                                                                                                                                                                                       | 4,3              | 13,8516      | 3,1              | 6,1908       |
| FBgn0037819         | 149633_at                 | CG14688    | -         | -                                                                                                                                                                                                       | 1,5              | 3,7441       | -                | -            |
| FBgn0037913         | 151826_at                 | CG6783     | -         | carrier activity / fatty acid binding / tricarboxylate carrier activity                                                                                                                                 | 1,9              | 5,6727       | 2,7              | 9,4451       |
| FBgn0037977         | 153367_at                 | CG3132     | Ect3      | beta-galactosidase activity                                                                                                                                                                             | -                | -            | 5,1              | 15,6732      |
| FBgn0038027         | 149762_at                 | CG4421     | GstD8     | glutathione peroxidase activity / glutathione transferase activity                                                                                                                                      | 1,8              | 2,8607       | -                | -            |
| FBgn0038059         | 149782_at                 | CG6489     | Hsp70Bc   | -                                                                                                                                                                                                       | 2,3              | 5,2724       | 0,6              | -            |
| FBgn0038194         | 152120_at                 | CG3050     | Cyp6d5    | electron transporter activity / oxidoreductase activity                                                                                                                                                 | 1,8              | 3,5325       | -                | -            |
| FBgn0038198         | 149871_at                 | CG3153     | -         | receptor binding                                                                                                                                                                                        | -                | -            | 2,5              | 4,7835       |
| FBgn0038243         | 149906_i_at / 149907_r_at | CG8066     | -         | cysteine protease inhibitor activity                                                                                                                                                                    | 7,9              | 8,0656       | 12,6             | 13,4042      |
| FBgn0038540         | 150095_at                 | CG14321    | -         | -                                                                                                                                                                                                       | 2,1              | 2,8534       | -                | -            |
| FBgn0038645         | 150159_at                 | CG7714     | -         | -                                                                                                                                                                                                       | 3,7              | 9,0134       | 1,9              | 4,1558       |
| FBgn0038661         | 141483_at                 | CG17836    | -         | protein dimerization activity                                                                                                                                                                           | -                | -            | 1,5              | 2,9145       |
| FBgn0039102         | 153098_at                 | CG16705    | -         | monophenol monoxygenase activator activity / trypsin activity / trypsin activity                                                                                                                        | -                | -            | 1,6              | 4,2179       |
| FBgn0039176         | 141731_at                 | CG13610    | -         | organic cation transporter activity                                                                                                                                                                     | 1,5              | 3,0159       | -                | -            |
| FBgn0039454         | 150684_at                 | CG14247    | -         | -                                                                                                                                                                                                       | 2,0              | 3,301        | -                | -            |
| FBgn0039593         | 150780_at                 | CG9989     | -         | -                                                                                                                                                                                                       | -                | -            | 2,3              | 4,2849       |
| FBgn0040716         | 151193_f_at               | CG33516    | dpr3      | -                                                                                                                                                                                                       | 1,5              | 3,1399       | -                | -            |
| FBgn0040736         | 151211_at                 | CG16844    | IM3       | -                                                                                                                                                                                                       | 3,7              | 4,5397       | 5,4              | 4,4152       |
| FBgn0040769         | 151244_f_at               | CG12431    | -         | -                                                                                                                                                                                                       | 1,5              | 3,0268       | -                | -            |
| FBgn0040827         | 151301_at                 | CG13315    | -         | -                                                                                                                                                                                                       | -                | -            | 2,2              | 3,069        |

Downregulated genes:

| FB code     | Affy identifier           | CG numbers | Synonyms  | Description / Molecular function                                                                                                                                                                                                                                                                    | Fold change st11 | t-value st11 | Fold change st12 | t-value st12 |
|-------------|---------------------------|------------|-----------|-----------------------------------------------------------------------------------------------------------------------------------------------------------------------------------------------------------------------------------------------------------------------------------------------------|------------------|--------------|------------------|--------------|
| FBgn0000011 | 143051_at                 | CG4807     | ab        | specific RNA polymerase II transcription factor activity                                                                                                                                                                                                                                            | -                | -            | -2,3             | -6,5031      |
| FBgn0000165 | 151955_at                 | CG5779     | Bc        | -                                                                                                                                                                                                                                                                                                   | -                | -            | -                | -            |
| FBgn0000180 | 155099_at                 | CG4722     | bib       | binding / carrier activity / water channel activity                                                                                                                                                                                                                                                 | -                | -            | -1,5             | -2,9349      |
| FBgn0000320 | 152004_at                 | CG9554     | cli       | -                                                                                                                                                                                                                                                                                                   | -                | -            | -1,6             | -3,0028      |
| FBgn0001145 | 143181_at                 | CG1743     | Gs2       | glutamate-ammonia ligase activity                                                                                                                                                                                                                                                                   | -                | -            | -1,7             | -4,5817      |
| FBgn0001941 | 153842_at                 | CG9078     | ifc       | sphingolipid delta-4 desaturase activity / stearoyl-CoA 9-desaturase activity                                                                                                                                                                                                                       | -                | -            | -1,6             | -3,435       |
| FBgn0002561 | 143237_at                 | CG3839     | I(1)sc    | specific RNA polymerase II transcription factor activity / transcription factor activity                                                                                                                                                                                                            | -                | -            | -1,5             | -4,8136      |
| FBgn0002789 | 143271_at                 | CG4696     | Mp20      | actin binding / calcium ion binding / structural constituent of cytoskeleton                                                                                                                                                                                                                        | -                | -            | -                | -1,7         |
| FBgn0003057 | 143296_at                 | CG10598    | -         | -                                                                                                                                                                                                                                                                                                   | -                | -            | -                | -1,7         |
| FBgn0003082 | 143303_at                 | CG11205    | phr       | nucleic acid binding / nucleic acid binding                                                                                                                                                                                                                                                         | -                | -            | -1,9             | -4,7286      |
| FBgn0003169 | 154591_at                 | CG7904     | put       | activin binding / activin receptor activity / hematopoietin/interferon-class (D200-domain) cytokine receptor activity / protein kinase activity / transforming growth factor beta receptor activity / type II activin receptor activity / type II transforming growth factor beta receptor activity | -                | -            | -1,9             | -3,6256      |
| FBgn0003326 | 143333_at                 | CG17579    | sca       | receptor binding / signal transducer activity                                                                                                                                                                                                                                                       | -                | -            | -1,7             | -2,9038      |
| FBgn0003356 | 143338_f_at               | CG31034    | Jon99Cii  | chymotrypsin activity / chymotrypsin activity / serine-type endopeptidase activity / serine-type endopeptidase activity / serine-type peptidase activity / serine-type peptidase activity                                                                                                           | -                | -            | -                | -14,6        |
| FBgn0003357 | 143340_f_at / 143339_i_at | CG31362    | Jon99Ciii | chymotrypsin activity / chymotrypsin activity / serine-type endopeptidase activity / serine-type endopeptidase activity / serine-type peptidase activity / serine-type peptidase activity                                                                                                           | -                | -            | -                | -15,3        |
| FBgn0003411 | 143353_at                 | CG1641     | sisA      | protein heterodimerization activity / transcription factor activity                                                                                                                                                                                                                                 | -                | -            | -1,6             | -4,8064      |
| FBgn0003462 | 143358_at                 | CG11793    | Sod       | antioxidant activity / copper, zinc superoxide dismutase activity                                                                                                                                                                                                                                   | -                | -            | -1,8             | -4,9209      |
| FBgn0003507 | 141687_at                 | CG3992     | srp       | DNA binding / general RNA polymerase II transcription factor activity / RNA polymerase II transcription factor activity / transcriptional activator activity                                                                                                                                        | -                | -            | -                | -2,2         |
| FBgn0003655 | 151660_at                 | CG3429     | swa       | dynein binding / RNA binding                                                                                                                                                                                                                                                                        | -                | -            | -2,1             | -2,9477      |
| FBgn0003995 | 143409_at                 | CG10037    | vvl       | DNA binding / protein binding / RNA polymerase II transcription factor activity / transcription factor activity                                                                                                                                                                                     | -                | -            | -2,2             | -4,967       |

|             |                           |         |            |                                                                                                                                                                                                    |       |          |      |          |
|-------------|---------------------------|---------|------------|----------------------------------------------------------------------------------------------------------------------------------------------------------------------------------------------------|-------|----------|------|----------|
| FBgn0004009 | 143414_at                 | CG4889  | wg         | frizzled-2 binding / morphogen activity / Notch binding / receptor binding / signal transducer activity                                                                                            | -2.2  | -5.6416  | -    | -        |
| FBgn0004425 | 143464_f_at               | CG1179  | LysB       | chitinase activity / lysozyme activity                                                                             | -1.9  | -5.3295  | -    | -        |
| FBgn0004427 | 143466_f_at               | CG9118  | LysD       | chitinase activity / lysozyme activity                                                                             | -2.6  | -7.9474  | -    | -        |
| FBgn0004428 | 143467_f_at               | CG1180  | LysE       | chitinase activity / lysozyme activity                                                                             | -3.8  | -5.7881  | -1.9 | -3.5723  |
| FBgn0004606 | 141676_at                 | CG1322  | zfh1       | DNA binding / RNA polymerase II transcription factor activity                                                                                                                                      | -1.9  | -9.1395  | -1.9 | -5.9723  |
| FBgn0005640 | 143565_at                 | CG10579 | Eip63E     | cyclin-dependent protein kinase activity / protein serine/threonine kinase activity / receptor signaling protein serine/threonine kinase activity                                                  | -1.6  | -3.8357  | -1.7 | -3.2134  |
| FBgn0010359 | 143603_i_at               | CG30028 | gammaTry   | NOT serine-type endopeptidase activity / trypsin activity / trypsin activity                                                                                                                       | -     | -        | -5.7 | -4.7816  |
| FBgn0010425 | 143624_at                 | CG18681 | epsilonTry | trypsin activity                                                                                                                                                                                   | -     | -        | -2.0 | -3.6351  |
| FBgn0011704 | 142872_at                 | CG8975  | Rnr5       | ribonucleoside-diphosphate reductase activity                                                                                                                                                      | -1.7  | -6.4233  | -    | -        |
| FBgn0011761 | 154221_at                 | CG4193  | dhd        | thiol-disulfide exchange intermediate activity                                                                                                                                                     | -2.7  | -7.6199  | -1.9 | -4.5365  |
| FBgn0014141 | 141641_at                 | CG3937  | cher       | actin binding / structural constituent of cytoskeleton                                                                                                                                             | -2.2  | -4.7334  | -    | -        |
| FBgn0015221 | 143784_at                 | CG1469  | Fer2LCH    | ferrous iron binding                                                                                                                                                                               | -     | -        | -1.5 | -4.4971  |
| FBgn0015286 | 143790_at                 | CG2849  | Rala       | GTPase activity                                                                                                                                                                                    | -     | -        | -1.8 | -4.076   |
| FBgn0015321 | 154399_at                 | CG8284  | UbcD4      | ligase activity / ubiquitin conjugating enzyme activity                                                                                                                                            | -1.7  | -6.6779  | -    | -        |
| FBgn0015800 | 143846_at                 | CG6920  | mus309     | ATP-dependent DNA helicase activity / ATP-dependent DNA helicase activity / DNA binding / DNA helicase activity / DNA-dependent protein kinase activity / helicase activity / nucleic acid binding | -1.6  | -3.3066  | -    | -        |
| FBgn0019686 | 154411_at                 | CG10895 | lok        | protein kinase activity / protein serine/threonine kinase activity / receptor signaling protein serine/threonine kinase activity                                                                   | -1.6  | -2.9705  | -    | -        |
| FBgn0020389 | 154327_at                 | CG8363  | Paps       | nucleotide kinase activity                                                                                                                                                                         | -1.8  | -4.0747  | -2.4 | -8.0161  |
| FBgn0020637 | 143935_s_at               | CG10534 | Lcp65Ag2   | structural constituent of larval cuticle (sensu Insecta) / structural constituent of larval cuticle (sensu Insecta)                                                                                | -1.7  | -4.7486  | -    | -        |
| FBgn0024332 | 153592_at                 | CG4206  | Mcm3       | chromatin binding / DNA helicase activity / DNA replication origin binding                                                                                                                         | -1.7  | -2.7777  | -    | -        |
| FBgn0024988 | 141607_at                 | CG14801 | -          | exonuclease activity / exonuclease activity / nucleic acid binding                                                                                                                                 | -3.1  | -5.2097  | -2.1 | -2.97    |
| FBgn0025627 | 154569_at                 | CG4194  | -          | -                                                                                                                                                                                                  | -1.5  | -4.8603  | -    | -        |
| FBgn0025885 | 153296_at                 | CG11443 | Inos       | -                                                                                                                                                                                                  | -2.3  | -8.1773  | -    | -        |
| FBgn0026415 | 144143_at                 | CG1780  | ldgf4      | imaginal disc growth factor activity                                                                                                                                                               | -1.8  | -5.3384  | -    | -        |
| FBgn0027348 | 153318_at                 | CG4501  | bgm        | -                                                                                                                                                                                                  | -     | -        | -1.6 | -2.9467  |
| FBgn0027496 | 154510_at                 | CG9543  | -          | -                                                                                                                                                                                                  | -1.6  | -2.8224  | -    | -        |
| FBgn0027560 | 152201_at                 | CG4104  | Tps1       | alpha, alpha-trehalose-phosphate synthase (UDP-forming) activity                                                                                                                                   | -1.6  | -3.6418  | -    | -        |
| FBgn0027657 | 152233_at                 | CG9734  | glob1      | carrier activity / oxygen transporter activity                                                                                                                                                     | -1.6  | -5.9619  | -    | -        |
| FBgn0027842 | 154586_at                 | CG12891 | CPT1       | acetyltransferase activity / carnitine O-palmitoyltransferase activity                                                                                                                             | -1.7  | -3.5423  | -    | -        |
| FBgn0027945 | 141370_at                 | CG7758  | ppl        | hydrolase activity                                                                                                                                                                                 | -1.7  | -3.1817  | -    | -        |
| FBgn0028491 | 151495_at                 | CG2930  | -          | proton-dependent oligopeptide transporter activity                                                                                                                                                 | -2.6  | -7.2922  | -    | -        |
| FBgn0028855 | 144266_at                 | CG15282 | -          | -                                                                                                                                                                                                  | -     | -        | -1.7 | -3.1691  |
| FBgn0028905 | 144302_at                 | CG32972 | -          | -                                                                                                                                                                                                  | -2.3  | -9.4381  | -1.9 | -5.6794  |
| FBgn0029804 | 144549_at                 | CG3097  | -          | carboxypeptidase A activity                                                                                                                                                                        | -1.8  | -4.7854  | -1.6 | -3.7323  |
| FBgn0030452 | 153453_at                 | CG4330  | -          | high affinity inorganic phosphate:sodium symporter activity                                                                                                                                        | -1.6  | -3.8435  | -    | -        |
| FBgn0030653 | 153970_at                 | CG7860  | -          | asparaginase activity                                                                                                                                                                              | -     | -        | -2.4 | -4.7414  |
| FBgn0030803 | 153983_at                 | CG4880  | -          | -                                                                                                                                                                                                  | -1.5  | -3.181   | -    | -        |
| FBgn0030891 | 154246_at                 | CG7098  | dik        | -                                                                                                                                                                                                  | -1.6  | -4.7961  | -    | -        |
| FBgn0031016 | 145366_at                 | CG12199 | kek5       | oxidoreductase activity / peroxidase activity                                                                                                                                                      | -     | -        | -2.5 | -4.2562  |
| FBgn0031097 | 151712_at / 142891_at     | CG17052 | -          | structural constituent of peritrophic membrane (sensu Insecta)                                                                                                                                     | -2.0  | -4.6285  | -1.7 | -3.5272  |
| FBgn0031316 | 141643_at                 | CG5105  | Plap       | phospholipase A2 activator activity                                                                                                                                                                | -1.5  | -2.936   | -    | -        |
| FBgn0031341 | 145584_at                 | CG5481  | lea        | axon guidance receptor activity / receptor activity                                                                                                                                                | -1.6  | -2.8561  | -    | -        |
| FBgn0031356 | 145594_at                 | CG17660 | -          | -                                                                                                                                                                                                  | -1.5  | -3.3679  | -    | -        |
| FBgn0031433 | 145648_at                 | CG18559 | Cyp309a2   | electron transporter activity / electron transporter activity / oxidoreductase activity / oxidoreductase activity                                                                                  | -     | -        | -1.9 | -3.5301  |
| FBgn0031599 | 145755_at                 | CG18013 | -          | transcriptional elongation regulator activity                                                                                                                                                      | -1.5  | -3.0032  | -    | -        |
| FBgn0031653 | 145795_at                 | CG8871  | Jon25Biii  | elastase activity / serine-type peptidase activity                                                                                                                                                 | -     | -        | -2.8 | -7.4964  |
| FBgn0031669 | 145804_at                 | CG31917 | -          | -                                                                                                                                                                                                  | -1.7  | -3.7788  | -    | -        |
| FBgn0031706 | 145823_at                 | CG6634  | nmr2       | transcription factor activity                                                                                                                                                                      | -1.8  | -3.6911  | -    | -        |
| FBgn0031914 | 153381_at                 | CG5973  | -          | carrier activity / retinal binding                                                                                                                                                                 | -2.3  | -4.2311  | -2.0 | -3.4906  |
| FBgn0031936 | 145974_at                 | CG13794 | -          | -                                                                                                                                                                                                  | -7.4  | -9.4528  | -5.6 | -6.9459  |
| FBgn0032014 | 154704_at                 | CG7840  | -          | -                                                                                                                                                                                                  | -1.6  | -5.8451  | -    | -        |
| FBgn0032114 | 146084_at                 | CG3752  | Aldh       | aldehyde dehydrogenase (NAD) activity                                                                                                                                                              | -1.5  | -3.559   | -    | -        |
| FBgn0032136 | 153828_at                 | CG15828 | -          | lipid binding                                                                                                                                                                                      | -1.7  | -3.8386  | -1.6 | -4.9562  |
| FBgn0032246 | 154968_at                 | CG5168  | -          | -                                                                                                                                                                                                  | -1.6  | -3.6227  | -    | -        |
| FBgn0032282 | 146181_at                 | CG7299  | -          | -                                                                                                                                                                                                  | -     | -        | -2.2 | -2.7929  |
| FBgn0032287 | 151967_at                 | CG6415  | -          | -                                                                                                                                                                                                  | -1.7  | -4.277   | -    | -        |
| FBgn0032295 | 155152_at                 | CG12299 | -          | transcription regulator activity                                                                                                                                                                   | -1.6  | -4.3079  | -    | -        |
| FBgn0032489 | 146318_at                 | CG15480 | -          | -                                                                                                                                                                                                  | -1.8  | -4.1689  | -    | -        |
| FBgn0032693 | 155069_at                 | CG10391 | Cyp310a1   | electron transporter activity / oxidoreductase activity                                                                                                                                            | -     | -        | -1.5 | -3.0347  |
| FBgn0032706 | 146449_at                 | CG10369 | Irk3       | inward rectifier potassium channel activity                                                                                                                                                        | -1.5  | -3.8264  | -    | -        |
| FBgn0032985 | 146620_s_at / 146619_i_at | CG1742  | Mgstl      | glutathione transferase activity                                                                                                                                                                   | -1.9  | -5.9341  | -    | -        |
| FBgn0033082 | 154155_at                 | CG3273  | sced       | -                                                                                                                                                                                                  | -1.6  | -3.9922  | -    | -        |
| FBgn0033144 | 141404_at                 | CG12172 | 5pn43Aa    | serine-type endopeptidase inhibitor activity                                                                                                                                                       | -3.1  | -8.1274  | -1.9 | -4.8445  |
| FBgn0033162 | 146732_at                 | CG1707  | -          | lactylglutathione lyase activity                                                                                                                                                                   | -1.7  | -3.4917  | -    | -        |
| FBgn0033275 | 146794_at                 | CG14756 | -          | -                                                                                                                                                                                                  | -3.6  | -5.2249  | -8.3 | -17.3377 |
| FBgn0033367 | 142220_at                 | CG8193  | -          | monophenol monooxygenase activity                                                                                                                                                                  | -4.4  | -13.3764 | -8.5 | -13.2493 |
| FBgn0033534 | 151592_at                 | CG12052 | iola       | RNA polymerase II transcription factor activity / specific RNA polymerase II transcription factor activity                                                                                         | -     | -        | -1.7 | -4.2124  |
| FBgn0033604 | 147002_at                 | CG9070  | -          | -                                                                                                                                                                                                  | -3.5  | -3.7283  | -2.2 | -5.6025  |
| FBgn0033634 | 147022_at                 | CG7763  | -          | -                                                                                                                                                                                                  | -1.8  | -6.3439  | -2.0 | -3.8132  |
| FBgn0033643 | 147029_s_at               | CG30035 | -          | fructose transporter activity / glucose transporter activity / glucose transporter activity                                                                                                        | -1.6  | -4.5504  | -    | -        |
| FBgn0033721 | 147084_at                 | CG13159 | -          | -                                                                                                                                                                                                  | -11.6 | -10.1467 | -5.3 | -12.0341 |
| FBgn0033921 | 147193_at                 | CG8589  | -          | -                                                                                                                                                                                                  | -2.0  | -4.3502  | -    | -        |
| FBgn0034158 | 154285_at                 | CG5522  | -          | guanyl-nucleotide exchange factor activity                                                                                                                                                         | -1.5  | -5.9816  | -1.5 | -2.871   |
| FBgn0034222 | 147364_at                 | CG14478 | -          | -                                                                                                                                                                                                  | -1.6  | -3.9799  | -    | -        |
| FBgn0034312 | 155151_at                 | CG10916 | -          | -                                                                                                                                                                                                  | -1.5  | -3.4594  | -    | -        |
| FBgn0034514 | 147549_at                 | CG13427 | -          | -                                                                                                                                                                                                  | -     | -        | -1.7 | -6.1262  |
| FBgn0034698 | 141793_at                 | CG6698  | Ntr        | -                                                                                                                                                                                                  | -2.1  | -4.1181  | -1.6 | -2.9455  |
| FBgn0034934 | 154176_at                 | CG2827  | Tal        | -                                                                                                                                                                                                  | -1.6  | -4.1054  | -    | -        |
| FBgn0035030 | 152423_at                 | CG3541  | -          | -                                                                                                                                                                                                  | -1.8  | -3.8074  | -1.6 | -3.4648  |
| FBgn0035190 | 147960_at                 | CG13913 | -          | -                                                                                                                                                                                                  | -7.7  | -9.9495  | -2.5 | -6.9885  |
| FBgn0035208 | 147969_at                 | CG9184  | -          | -                                                                                                                                                                                                  | -1.8  | -10.3863 | -1.5 | -3.7306  |
| FBgn0035209 | 147970_at                 | CG13914 | -          | -                                                                                                                                                                                                  | -1.7  | -5.6441  | -    | -        |
| FBgn0035315 | 152877_at                 | CG8960  | -          | -                                                                                                                                                                                                  | -     | -        | -1.6 | -4.1655  |
| FBgn0035494 | 142340_at                 | CG14993 | Faa        | fumarylacetoacetase activity                                                                                                                                                                       | -     | -        | -1.8 | -2.8053  |
| FBgn0035551 | 148182_at                 | CG7465  | -          | -                                                                                                                                                                                                  | -3.4  | -3.7869  | -4.2 | -8.7797  |
| FBgn0035621 | 154354_at                 | CG10591 | -          | -                                                                                                                                                                                                  | -1.8  | -2.9702  | -1.6 | -5.4682  |
| FBgn0035664 | 148253_at                 | CG6467  | Jon65Aiv   | chymotrypsin activity / serine-type endopeptidase activity                                                                                                                                         | -     | -        | -1.7 | -3.1501  |
| FBgn0035706 | 148284_at                 | CG10125 | zpg        | innexin channel activity                                                                                                                                                                           | -1.5  | -2.8997  | -    | -        |
| FBgn0035926 | 148422_at                 | CG5804  | -          | acyl-CoA binding / carrier activity / diazepam binding / enzyme inhibitor activity                                                                                                                 | -     | -        | -2.5 | -5.469   |
| FBgn0035961 | 153070_at                 | CG4821  | Tequila    | pancreatic elastase activity / serine-type endopeptidase activity / trypsin activity                                                                                                               | -     | -        | -1.5 | -4.2988  |
| FBgn0035999 | 148467_at                 | CG3552  | -          | -                                                                                                                                                                                                  | -2.1  | -3.6543  | -2.1 | -3.9772  |
| FBgn0036486 | 148795_at                 | CG7003  | -          | damaged DNA binding                                                                                                                                                                                | -2.1  | -3.3096  | -    | -        |
| FBgn0036488 | 148796_at                 | CG6878  | -          | -                                                                                                                                                                                                  | -1.7  | -5.0372  | -    | -        |
| FBgn0036533 | 148825_at                 | CG6151  | -          | -                                                                                                                                                                                                  | -1.6  | -3.2266  | -    | -        |
| FBgn0036539 | 148828_at                 | CG32150 | -          | -                                                                                                                                                                                                  | -1.7  | -4.5548  | -    | -        |
| FBgn0036787 | 148995_at                 | CG4306  | -          | -                                                                                                                                                                                                  | -1.8  | -3.0278  | -2.1 | -5.8814  |
| FBgn0036802 | 142148_at                 | CG4144  | GNBP2      | glucosidase activity / Gram-negative bacterial binding / pattern recognition receptor activity                                                                                                     | -1.6  | -6.1791  | -1.6 | -3.1716  |
| FBgn0036826 | 153314_at                 | CG3893  | -          | -                                                                                                                                                                                                  | -1.6  | -2.7762  | -    | -        |
| FBgn0036852 | 149033_at                 | CG9739  | fz2        | G-protein coupled receptor activity / transmembrane receptor activity / Wnt receptor activity / Wnt-protein binding                                                                                | -1.6  | -3.3077  | -1.9 | -4.3575  |
| FBgn0036863 | 154347_at                 | CG9670  | fal        | -                                                                                                                                                                                                  | -1.8  | -3.0516  | -    | -        |
| FBgn0036875 | 149052_at                 | CG9449  | -          | acid phosphatase activity                                                                                                                                                                          | -     | -        | -2.8 | -6.607   |
| FBgn0036898 | 151832_at                 | CG8782  | Oat        | ornithine-oxo-acid transaminase activity                                                                                                                                                           | -1.9  | -3.2456  | -    | -        |
| FBgn0036901 | 141311_at                 | CG8756  | LCBP1      | -                                                                                                                                                                                                  | -2.2  | -7.7939  | -    | -        |
| FBgn0037083 | 141375_at                 | CG5656  | -          | alkaline phosphatase activity / nucleotide phosphatase activity                                                                                                                                    | -     | -        | -1.8 | -6.185   |
| FBgn0037177 | 149244_at                 | CG14454 | -          | molecular_function unknown                                                                                                                                                                         | -1.5  | -3.5311  | -    | -        |
| FBgn0037181 | 149248_at                 | CG11370 | -          | -                                                                                                                                                                                                  | -     | -        | -1.5 | -3.7342  |
| FBgn0037353 | 155055_at                 | CG31549 | -          | oxidoreductase activity / structural constituent of cytoskeleton / structural molecule activity                                                                                                    | -1.7  | -3.8343  | -    | -        |
| FBgn0037549 | 154657_at                 | CG7878  | -          | ATP-dependent RNA helicase activity / helicase activity / nucleic acid binding                                                                                                                     | -1.9  | -4.0798  | -    | -        |
| FBgn0037607 | 153373_at                 | CG8036  | -          | transketolase activity                                                                                                                                                                             | -1.5  | -6.8551  | -    | -        |
| FBgn0037614 | 149520_at                 | CG8116  | -          | -                                                                                                                                                                                                  | -1.6  | -4.1849  | -    | -        |
| FBgn0037699 | 154821_at                 | CG8147  | -          | alkaline phosphatase activity / nucleotide phosphatase activity                                                                                                                                    | -     | -        | -2.0 | -4.2542  |
| FBgn0037844 | 153457_at                 | CG4570  | -          | -                                                                                                                                                                                                  | -1.5  | -5.7372  | -    | -        |

|             |             |         |             |                                                                                                 |      |         |      |         |
|-------------|-------------|---------|-------------|-------------------------------------------------------------------------------------------------|------|---------|------|---------|
| FBgn0037912 | 155150_at   | CG6782  | -           | carrier activity / fatty acid binding / tricarboxylate carrier activity                         | -1.6 | -3.1765 | -    | -       |
| FBgn0038024 | 149759_at   | CG12242 | GstD5       | glutathione transferase activity                                                                | -    | -       | -2.5 | -5.5697 |
| FBgn0038040 | 153596_at   | CG5663  | Dip-C       | dipeptidyl-peptidase activity / X-Pro dipeptidase activity                                      | -1.7 | -3.6104 | -    | -       |
| FBgn0038353 | 149968_at   | CG5399  | -           | -                                                                                               | -2.8 | -8.256  | -    | -       |
| FBgn0038413 | 141589_at   | CG6725  | Sulf1       | N-acetylglucosamine-6-sulfatase activity                                                        | -1.6 | -3.3332 | -    | -       |
| FBgn0038563 | 152336_at   | CG7780  | DNasell     | -                                                                                               | -2.2 | -4.9595 | -1.8 | -3.552  |
| FBgn0038803 | 152563_at   | CG5191  | -           | hydrolase activity                                                                              | -1.5 | -4.1467 | -    | -       |
| FBgn0038971 | 150368_at   | CG13845 | -           | -                                                                                               | -    | -       | -1.6 | -3.4429 |
| FBgn0038973 | 150369_at   | CG18594 | -           | kinase inhibitor activity / kinase regulator activity                                           | -    | -       | -1.8 | -4.6029 |
| FBgn0039052 | 150424_at   | CG6733  | -           | NOT aminoacylase activity                                                                       | -    | -       | -1.9 | -3.526  |
| FBgn0039098 | 142671_at   | CG13822 | -           | -                                                                                               | -2.0 | -3.8467 | -1.8 | -4.6726 |
| FBgn0039114 | 152325_at   | CG10374 | Lsd-1       | -                                                                                               | -    | -       | -3.4 | -7.3861 |
| FBgn0039251 | 150539_at   | CG17462 | -           | nucleic acid binding / sigma DNA polymerase activity                                            | -1.8 | -2.7769 | -    | -       |
| FBgn0039436 | 150665_s_at | CG6478  | -           | -                                                                                               | -2.2 | -3.582  | -    | -       |
| FBgn0039537 | 151807_at   | CG5590  | -           | oxidoreductase activity, acting on the CH-OH group of donors, NAD or NADP as acceptor           | -1.6 | -4.5367 | -    | -       |
| FBgn0039539 | 154473_at   | CG12880 | -           | -                                                                                               | -    | -       | -3.7 | -3.1661 |
| FBgn0039678 | 150831_at   | CG18111 | Obp99a      | odorant binding                                                                                 | -2.2 | -8.7211 | -1.6 | -5.2268 |
| FBgn0039682 | 150834_at   | CG7584  | Obp99c      | -                                                                                               | -    | -       | -1.8 | -5.0039 |
| FBgn0039686 | 150838_at   | CG15506 | -           | -                                                                                               | -    | -       | -2.0 | -4.3292 |
| FBgn0039777 | 150893_f_at | CG2229  | Jon99Fii    | elastase activity / NOT serine-type endopeptidase activity / serine-type endopeptidase activity | -    | -       | -6.9 | -7.1207 |
| FBgn0039778 | 141369_at   | CG18030 | Jon99Fi     | elastase activity / NOT serine-type endopeptidase activity / serine-type endopeptidase activity | -    | -       | -8.4 | -6.0641 |
| FBgn0039779 | 150894_at   | CG1546  | PH4alpha5G2 | procollagen-proline 4-dioxygenase activity                                                      | -    | -       | -2.1 | -3.776  |
| FBgn0039851 | 151691_at   | CG12063 | -           | -                                                                                               | -    | -       | -1.9 | -3.6417 |
| FBgn0039873 | 150955_at   | CG2191  | -           | cation transporter activity / sodium-dependent multivitamin transporter activity                | -4.5 | -5.2677 | -    | -       |
| FBgn0039890 | 154488_at   | CG2316  | -           | ATPase activity, coupled to transmembrane movement of substances / transporter activity         | -1.5 | -3.075  | -    | -       |
| FBgn0039930 | 150994_at   | CG11077 | -           | -                                                                                               | -1.8 | -3.1431 | -    | -       |
| FBgn0040609 | 151094_at   | CG3348  | -           | -                                                                                               | -    | -       | -1.7 | -5.9327 |
| FBgn0040650 | 151134_at   | CG15456 | -           | -                                                                                               | -2.4 | -3.7144 | -    | -       |
| FBgn0040796 | 151266_at   | CG13064 | -           | -                                                                                               | -4.3 | -3.6568 | -1.6 | -5.6827 |
| FBgn0040942 | 151409_at   | CG12643 | -           | -                                                                                               | -1.8 | -3.691  | -1.7 | -2.8922 |
| FBgn0040984 | 151444_at   | CG4440  | -           | -                                                                                               | -1.6 | -6.2295 | -2.6 | -9.0294 |

Table S2. Genes responsive to Scr induction

Up-regulated genes:

| FB code     | Affy identifier           | CG numbers | Synonyms    | Description / Molecular function                                                            | Fold change st11 | t-value st11 | Fold change st12 | t-value st12 |
|-------------|---------------------------|------------|-------------|---------------------------------------------------------------------------------------------|------------------|--------------|------------------|--------------|
| FBgn0001204 | 143189_at                 | CG9768     | hkb         | specific RNA polymerase II transcription factor activity                                    | 1,5              | 2,9421       | -                | -            |
| FBgn0002570 | 143242_at                 | CG8696     | LvpH        | alpha-glucosidase activity                                                                  | -                | -            | 2,87             | 4,6416       |
| FBgn0003089 | 143305_at                 | CG9614     | pip         | heparin-sulfate 2-sulfotransferase activity / sulfotransferase activity                     | 1,9              | 3,1068       | -                | -            |
| FBgn0012037 | 153728_at                 | CG8827     | Ance        | peptidyl-dipeptidase A activity / zinc ion binding                                          | 1,6              | 2,9181       | -                | -            |
| FBgn0013772 | 142189_at                 | CG10248    | Cyp6a8      | electron transporter activity / oxidoreductase activity                                     | 1,8              | 3,7074       | -                | -            |
| FBgn0014469 | 154078_at                 | CG2060     | Cyp4e2      | electron transporter activity / oxidoreductase activity                                     | 2,9              | 9,2143       | 2,795            | 9,1937       |
| FBgn0020389 | 154327_at                 | CG8363     | Paps        | nucleotide kinase activity                                                                  | -                | -            | 1,672            | 4,2712       |
| FBgn0023520 | 152934_at                 | CG3857     | -           | -                                                                                           | 2,9              | 6,978        | 2,393            | 5,8163       |
| FBgn0028922 | 144311_at                 | CG4182     | yellow-c    | -                                                                                           | -                | -            | 2,249            | 3,7421       |
| FBgn0029744 | 141469_at                 | CG11706    | -           | -                                                                                           | -                | -            | 2,017            | 3,7502       |
| FBgn0030498 | 145018_at                 | CG32632    | -           | protein-tyrosine sulfotransferase activity                                                  | -                | -            | 1,722            | 3,4425       |
| FBgn0031000 | 145357_at                 | CG7876     | -           | -                                                                                           | -                | -            | 1,792            | 3,2698       |
| FBgn0031313 | 154669_at                 | CG5080     | -           | -                                                                                           | -                | -            | 1,774            | 2,8413       |
| FBgn0031561 | 145731_at                 | CG16712    | -           | serine-type endopeptidase inhibitor activity                                                | 2,2              | 4,3382       | 2,99             | 5,2919       |
| FBgn0031964 | 145995_at                 | CG33121    | -           | serine-type endopeptidase inhibitor activity / serine-type endopeptidase inhibitor activity | 39,1             | 15,7134      | 41,3             | 9,2308       |
| FBgn0033788 | 147126_i_at               | CG13323    | -           | -                                                                                           | 1,7              | 4,368        | -                | -            |
| FBgn0034290 | 142954_at                 | CG5773     | -           | -                                                                                           | 2,5              | 5,2975       | 2,26             | 3,4512       |
| FBgn0034294 | 147409_at                 | CG5765     | -           | -                                                                                           | -                | -            | 1,748            | 3,5225       |
| FBgn0034352 | 147441_at                 | CG17669    | -           | -                                                                                           | 1,5              | -            | 2,032            | 3,5259       |
| FBgn0034819 | 147740_at                 | CG9877     | -           | -                                                                                           | -                | -            | 2,295            | 2,874        |
| FBgn0035434 | 148103_at                 | CG10812    | dro5        | -                                                                                           | 2,0              | 6,6404       | 1,926            | 6,217        |
| FBgn0035880 | 152139_at                 | CG17352    | -           | -                                                                                           | -                | -            | 1,515            | 3,3938       |
| FBgn0036167 | 148580_f_at               | CG33272    | -           | -                                                                                           | -                | -            | 1,652            | 3,1667       |
| FBgn0036390 | 148732_at                 | CG13738    | -           | -                                                                                           | -                | -            | 1,835            | 3,2383       |
| FBgn0036457 | 148772_at                 | CG3396     | Ocho        | -                                                                                           | 2,5              | 4,6561       | 1,783            | 3,0176       |
| FBgn0036786 | 148994_at                 | CG13701    | skl         | -                                                                                           | 1,7              | 2,8069       | -                | -            |
| FBgn0037179 | 149246_at                 | CG14453    | -           | -                                                                                           | -                | -            | 1,683            | 3,5791       |
| FBgn0037180 | 149247_s_at               | CG14452    | -           | -                                                                                           | -                | -            | 3,327            | 4,137        |
| FBgn0037672 | 149545_at                 | CG12952    | sage        | transcription factor activity                                                               | 1,8              | 4,2542       | 2,202            | 3,8284       |
| FBgn0038009 | 149747_at                 | CG17738    | -           | -                                                                                           | -                | -            | 3,76             | 5,6475       |
| FBgn0039176 | 141731_at                 | CG13610    | -           | organic cation transporter activity                                                         | 1,6              | 3,6383       | -                | -            |
| FBgn0039441 | 150670_i_at / 150671_f_at | CG5476     | -           | -                                                                                           | -                | -            | 3,617            | 4,875        |
| FBgn0039779 | 150894_at                 | CG1546     | PH4alpha5G2 | procollagen-proline 4-dioxygenase activity                                                  | -                | -            | 2,603            | 4,2357       |
| FBgn0040736 | 151211_at                 | CG16844    | IM3         | -                                                                                           | 2,6              | 4,2499       | 9,003            | 7,057        |
| FBgn0040741 | 151217_at                 | CG14486    | Uhg1        | -                                                                                           | 23,0             | 12,7921      | 17,87            | 9,2686       |

Downregulated genes:

| FB code      | Affy identifier           | CG Numbers | Synonyms  | Description / Molecular Function                                                                                                                                                                | Fold change st11 | t-value st11 | Fold change st12 | t-value st12 |
|--------------|---------------------------|------------|-----------|-------------------------------------------------------------------------------------------------------------------------------------------------------------------------------------------------|------------------|--------------|------------------|--------------|
| FBgn0000166  | 142838_at                 | CG1034     | bcd       | morphogen activity / specific RNA polymerase II transcription factor activity / translation regulator activity                                                                                  | -1.8             | -4.4284      | -2.1             | -3.6549      |
| FBgn0000183  | 153897_at                 | CG6605     | BicD      | chromatin binding / dynein binding / NOT RNA binding                                                                                                                                            | -1.5             | -3.709       | -                | -            |
| FBgn0000192  | 143175_at                 | CG8893     | Gapdh2    | glyceraldehyde-3-phosphate dehydrogenase (phosphorylating) activity                                                                                                                             | -                | -            | -1.7             | -3.6224      |
| FBgn0000198  | 154218_at                 | CG5320     | Gdh       | glutamate dehydrogenase [NAD(P)+] activity                                                                                                                                                      | -1.7             | -5.1886      | -                | -            |
| FBgn00002124 | 153583_at                 | CG4463     | Hsp23     | actin binding                                                                                                                                                                                   | -2.3             | -3.93        | -                | -            |
| FBgn00002789 | 143271_at                 | CG4696     | Mp20      | actin binding / calcium ion binding / structural constituent of cytoskeleton                                                                                                                    | -                | -            | -1.6             | -3.0759      |
| FBgn00003356 | 143338_f_at               | CG31034    | Jon99Cii  | chymotrypsin activity / chymotrypsin activity / serine-type endopeptidase activity / serine-type endopeptidase activity / serine-type peptidase activity / serine-type peptidase activity       | -                | -            | -4.5             | -7.1121      |
| FBgn00003357 | 143340_f_at / 143339_l_at | CG31362    | Jon99Cii1 | chymotrypsin activity / chymotrypsin activity / serine-type endopeptidase activity / serine-type endopeptidase activity / serine-type peptidase activity / serine-type peptidase activity       | -                | -            | -4.1             | -4.9129      |
| FBgn00003462 | 143358_at                 | CG11793    | Sod       | antioxidant activity / copper, zinc superoxide dismutase activity                                                                                                                               | -2.0             | -5.5993      | -                | -            |
| FBgn00003655 | 151660_at                 | CG3429     | swa       | dynein binding / RNA binding                                                                                                                                                                    | -2.5             | -3.6869      | -                | -            |
| FBgn00004425 | 143464_f_at               | CG1179     | LysB      | chitinase activity / lysozyme activity                                                                          | -1.9             | -4.3364      | -                | -            |
| FBgn00004426 | 143465_f_at               | CG9111     | LysC      | chitinase activity / lysozyme activity                                                      | -1.5             | -3.0071      | -                | -            |
| FBgn00004427 | 143466_f_at               | CG9118     | LysD      | chitinase activity / lysozyme activity                                                                          | -2.6             | -6.3178      | -                | -            |
| FBgn00004428 | 143467_f_at               | CG1180     | LysE      | chitinase activity / lysozyme activity                                                                          | -3.7             | -8.008       | -                | -            |
| FBgn00004606 | 141676_at                 | CG1322     | zfh1      | DNA binding / RNA polymerase II transcription factor activity                                                                                                                                   | -1.6             | -5.083       | -1.6             | -3.2994      |
| FBgn00004834 | 154978_at                 | CG17998    | Gprk2     | G-protein coupled receptor kinase activity / protein serine/threonine kinase activity / receptor signaling protein serine/threonine kinase activity / regulator of G-protein signaling activity | -1.7             | -3.111       | -                | -            |
| FBgn0010019  | 152015_at                 | CG3972     | Cyp4g1    | electron transporter activity / oxidoreductase activity                                                                                                                                         | -                | -            | -2.1             | -3.3788      |
| FBgn00102    | 153990_at                 | CG8938     | GstS1     | glutathione peroxidase activity / glutathione transferase activity                                                                                                                              | -1.6             | -6.5369      | -                | -            |

|             |                           |         |           |                                                                                                                                                                                                    |      |          |      |         |  |
|-------------|---------------------------|---------|-----------|----------------------------------------------------------------------------------------------------------------------------------------------------------------------------------------------------|------|----------|------|---------|--|
| 26          |                           |         |           |                                                                                                                                                                                                    |      |          |      |         |  |
| FBgn0010359 | 143603_i_at               | CG30028 | gammaTry  | NOT serine-type endopeptidase activity / trypsin activity / trypsin activity                                                                                                                       | -    | -        | -5,1 | -2,8246 |  |
| FBgn0011761 | 154221_at                 | CG4193  | dhd       | thiol-disulfide exchange intermediate activity                                                                                                                                                     | -    | -        | -2,2 | -5,723  |  |
| FBgn0014032 | 151950_at                 | CG12117 | Sptr      | sepiapterin reductase activity                                                                                                                                                                     | -1,7 | -3,1071  | -    | -       |  |
| FBgn0014141 | 141641_at                 | CG3937  | cher      | actin binding / structural constituent of cytoskeleton                                                                                                                                             | -4,3 | -8,575   | -1,6 | -3,6542 |  |
| FBgn0015286 | 143790_at                 | CG2849  | Rala      | GTPase activity                                                                                                                                                                                    | -    | -        | -1,6 | -3,3995 |  |
| FBgn0015321 | 154399_at                 | CG8284  | UbcD4     | ligase activity / ubiquitin conjugating enzyme activity                                                                                                                                            | -2,1 | -6,1371  | -    | -       |  |
| FBgn0015800 | 143846_at                 | CG6920  | mus309    | ATP-dependent DNA helicase activity / ATP-dependent DNA helicase activity / DNA binding / DNA helicase activity / DNA-dependent protein kinase activity / helicase activity / nucleic acid binding | -2,0 | -2,9371  | -    | -       |  |
| FBgn0024984 | 153908_at                 | CG3457  | -         | -                                                                                                                                                                                                  | -1,6 | -2,8049  | -    | -       |  |
| FBgn0024988 | 141607_at                 | CG14801 | -         | exonuclease activity / exonuclease activity / nucleic acid binding                                                                                                                                 | -3,1 | -7,2971  | -    | -       |  |
| FBgn0026077 | 153539_at                 | CG10287 | Gasp      | chitin binding / structural constituent of peritrophic membrane (sensu Insecta)                                                                                                                    | -    | -        | -1,9 | -3,7994 |  |
| FBgn0026150 | 153980_at                 | CG6291  | ApepP     | metallopeptidase activity                                                                                                                                                                          | -1,6 | -4,3423  | -    | -       |  |
| FBgn0026415 | 144143_at                 | CG1780  | ldgf4     | imaginal disc growth factor activity                                                                                                                                                               | -1,7 | -5,471   | -    | -       |  |
| FBgn0027052 | 144169_at                 | CG5203  | CHIP      | ubiquitin-protein ligase activity                                                                                                                                                                  | -1,9 | -3,6669  | -    | -       |  |
| FBgn0027547 | 152350_at                 | CG1927  | -         | -                                                                                                                                                                                                  | -1,7 | -4,9201  | -    | -       |  |
| FBgn0027552 | 142257_at                 | CG10863 | -         | aldehyde reductase activity                                                                                                                                                                        | -1,7 | -4,6126  | -    | -       |  |
| FBgn0027606 | 151864_at                 | CG12787 | hoe1      | cation transporter activity / L-tyrosine transporter activity / transporter activity                                                                                                               | -2,0 | -3,1918  | -    | -       |  |
| FBgn0028905 | 144302_at                 | CG32972 | -         | -                                                                                                                                                                                                  | -1,6 | -6,2368  | -    | -       |  |
| FBgn0029865 | 154623_at                 | CG15893 | -         | -                                                                                                                                                                                                  | -1,8 | -3,9968  | -    | -       |  |
| FBgn0029899 | 151584_r_at               | CG14438 | -         | -                                                                                                                                                                                                  | -2,2 | -3,3848  | -    | -       |  |
| FBgn0030186 | 154400_at                 | CG2962  | -         | -                                                                                                                                                                                                  | -    | -        | -1,9 | -3,2645 |  |
| FBgn0030472 | 153359_at                 | CG1633  | Jafrac1   | antioxidant activity / peroxidase activity / thioredoxin peroxidase activity                                                                                                                       | -    | -        | -1,6 | -3,2793 |  |
| FBgn0030557 | 154460_at                 | CG12047 | mud       | -                                                                                                                                                                                                  | -1,9 | -3,0921  | -    | -       |  |
| FBgn0030803 | 153983_at                 | CG4880  | -         | -                                                                                                                                                                                                  | -1,8 | -6,4796  | -    | -       |  |
| FBgn0031450 | 154536_at                 | CG2903  | Hrs       | protein binding                                                                                                                                                                                    | -1,6 | -5,0312  | -    | -       |  |
| FBgn0031737 | 151477_at                 | CG11142 | -         | structural constituent of peritrophic membrane (sensu Insecta)                                                                                                                                     | -    | -        | -1,7 | -3,5436 |  |
| FBgn0031782 | 141393_at                 | CG9226  | -         | guanyl nucleotide binding                                                                                                                                                                          | -1,6 | -2,8655  | -    | -       |  |
| FBgn0031936 | 145974_at                 | CG13794 | -         | -                                                                                                                                                                                                  | -7,4 | -5,7409  | -5,6 | -5,9005 |  |
| FBgn0031990 | 153985_at                 | CG8552  | -         | phospholipase A1 activity                                                                                                                                                                          | -1,8 | -4,4156  | -    | -       |  |
| FBgn0032014 | 154704_at                 | CG7840  | -         | -                                                                                                                                                                                                  | -1,8 | -4,9155  | -    | -       |  |
| FBgn0032262 | 155142_at                 | CG7384  | -         | -                                                                                                                                                                                                  | -1,8 | -2,78    | -    | -       |  |
| FBgn0032884 | 153490_at                 | CG9324  | Pomp      | -                                                                                                                                                                                                  | -1,5 | -2,7801  | -    | -       |  |
| FBgn0032890 | 151641_at                 | CG31673 | -         | glyoxylate reductase (NADP) activity                                                                                                                                                               | -1,7 | -3,2224  | -    | -       |  |
| FBgn0032977 | 151479_at                 | CG6448  | -         | -                                                                                                                                                                                                  | -    | -        | -1,7 | -3,7154 |  |
| FBgn0032985 | 146620_s_at / 146619_l_at | CG1742  | MgstII    | glutathione transferase activity                                                                                                                                                                   | -2,0 | -5,9979  | -2,3 | -4,3739 |  |
| FBgn0033082 | 154155_at                 | CG3273  | sced      | -                                                                                                                                                                                                  | -1,9 | -4,4074  | -    | -       |  |
| FBgn0033144 | 141404_at                 | CG12172 | Spn43Aa   | serine-type endopeptidase inhibitor activity                                                                                                                                                       | -1,6 | -4,5086  | -    | -       |  |
| FBgn0033162 | 146732_at                 | CG1707  | -         | lactoylglutathione lyase activity                                                                                                                                                                  | -1,6 | -2,9196  | -    | -       |  |
| FBgn0033205 | 141701_at                 | CG2064  | -         | oxidoreductase activity                                                                                                                                                                            | -1,6 | -4,7489  | -1,5 | -3,5809 |  |
| FBgn0033236 | 154856_at                 | CG14764 | -         | -                                                                                                                                                                                                  | -1,7 | -4,0997  | -    | -       |  |
| FBgn0033367 | 142220_at                 | CG8193  | -         | monophenol monooxygenase activity                                                                                                                                                                  | -1,6 | -3,0576  | -    | -       |  |
| FBgn0033518 | 146946_s_at               | CG11765 | Prx2540-2 | antioxidant activity / antioxidant activity / non-selenium glutathione peroxidase activity / peroxidase activity / peroxidase activity / peroxidase activity                                       | -    | -        | -1,6 | -5,8415 |  |
| FBgn0033519 | 146947_at                 | CG11825 | -         | -                                                                                                                                                                                                  | -2,1 | -5,3767  | -1,8 | -4,6404 |  |
| FBgn0033534 | 151592_at                 | CG12052 | lola      | RNA polymerase II transcription factor activity / specific RNA polymerase II transcription factor activity                                                                                         | -1,7 | -3,2797  | -    | -       |  |
| FBgn0033921 | 147193_at                 | CG8589  | -         | -                                                                                                                                                                                                  | -2,1 | -4,8515  | -    | -       |  |
| FBgn0034079 | 154150_at                 | CG8430  | Got1      | -                                                                                                                                                                                                  | -1,8 | -5,4092  | -1,6 | -2,9654 |  |
| FBgn0034171 | 153335_at                 | CG6657  | veg       | -                                                                                                                                                                                                  | -1,5 | -4,6969  | -    | -       |  |
| FBgn0034201 | 147355_at                 | CG17290 | -         | -                                                                                                                                                                                                  | -    | -        | -2,7 | -2,9954 |  |
| FBgn0034215 | 153128_at                 | CG4802  | -         | S-methyl-5-thioadenosine phosphorylase activity                                                                                                                                                    | -1,6 | -5,5965  | -    | -       |  |
| FBgn0034222 | 147364_at                 | CG14478 | -         | -                                                                                                                                                                                                  | -1,6 | -3,9422  | -    | -       |  |
| FBgn0034250 | 141797_at                 | CG4924  | icln      | -                                                                                                                                                                                                  | -1,6 | -4,1044  | -    | -       |  |
| FBgn0034345 | 155076_at                 | CG5174  | -         | -                                                                                                                                                                                                  | -1,6 | -4,3402  | -    | -       |  |
| FBgn0035151 | 154989_at                 | CG17129 | -         | -                                                                                                                                                                                                  | -1,8 | -2,8859  | -    | -       |  |
| FBgn0035190 | 147960_at                 | CG13913 | -         | -                                                                                                                                                                                                  | -5,0 | -10,4749 | -2,0 | -5,878  |  |
| FBgn0035209 | 147970_at                 | CG13914 | -         | -                                                                                                                                                                                                  | -1,8 | -4,14    | -    | -       |  |
| FBgn0035252 | 153945_at                 | CG7970  | -         | -                                                                                                                                                                                                  | -1,6 | -5,8803  | -    | -       |  |
| FBgn0035420 | 152138_at                 | CG14967 | -         | -                                                                                                                                                                                                  | -1,7 | -2,7894  | -    | -       |  |
| FBgn00354   | 154425_at                 | CG17746 | -         | protein serine/threonine phosphatase activity                                                                                                                                                      | -1,6 | -3,1755  | -    | -       |  |

|             |                           |         |          |                                                                                                                                                                                 |  |      |         |      |         |
|-------------|---------------------------|---------|----------|---------------------------------------------------------------------------------------------------------------------------------------------------------------------------------|--|------|---------|------|---------|
| 25          |                           |         |          |                                                                                                                                                                                 |  |      |         |      |         |
| FBgn0035471 | 141758_at                 | CG10849 | Sc2      | -                                                                                                                                                                               |  | -1.6 | -3.5032 | -    | -       |
| FBgn0035513 | 148157_at                 | CG1259  | -        | structural constituent of larval cuticle (sensu Insecta)                                                                                                                        |  | -    | -       | -1.8 | -3.4923 |
| FBgn0035551 | 148182_at                 | CG7465  | -        | -                                                                                                                                                                               |  | -2.5 | -3.3454 | -2.7 | -9.9644 |
| FBgn0035608 | 148223_at                 | CG10630 | -        | -                                                                                                                                                                               |  | -1.9 | -4.4117 | -    | -       |
| FBgn0035640 | 148237_at                 | CG17498 | mad2     | -                                                                                                                                                                               |  | -1.5 | -4.6419 | -    | -       |
| FBgn0035664 | 148253_at                 | CG6467  | Jon65Aiv | chymotrypsin activity / serine-type endopeptidase activity                                                                                                                      |  | -    | -       | -1.6 | -3.2976 |
| FBgn0035735 | 148301_at                 | CG8640  | -        | structural constituent of cuticle (sensu Insecta)                                                                                                                               |  | -    | -       | -2.7 | -7.112  |
| FBgn0035811 | 154110_at                 | CG12262 | -        | acyl-CoA dehydrogenase activity                                                                                                                                                 |  | -1.5 | -4.342  | -    | -       |
| FBgn0035926 | 148422_at                 | CG5804  | -        | acyl-CoA binding / carrier activity / diazepam binding / enzyme inhibitor activity                                                                                              |  | -    | -       | -2.5 | -3.3116 |
| FBgn0035945 | 141294_at                 | CG5026  | -        | protein tyrosine/serine/threonine phosphatase activity                                                                                                                          |  | -1.6 | -2.8947 | -    | -       |
| FBgn0035999 | 148467_at                 | CG3552  | -        | -                                                                                                                                                                               |  | -2.1 | -3.3348 | -2.4 | -6.4687 |
| FBgn0036030 | 148484_at                 | CG6767  | -        | nucleotide kinase activity / ribose-phosphate diphosphokinase activity                                                                                                          |  | -1.7 | -7.2292 | -    | -       |
| FBgn0036182 | 153576_at                 | CG6084  | -        | aldehyde reductase activity                                                                                                                                                     |  | -    | -       | -1.8 | -3.7437 |
| FBgn0036272 | 148648_at                 | CG4300  | -        | -                                                                                                                                                                               |  | -1.5 | -2.8907 | -    | -       |
| FBgn0036594 | 148867_at                 | CG13047 | -        | -                                                                                                                                                                               |  | -    | -       | -1.8 | -3.1834 |
| FBgn0036600 | 148873_at                 | CG13043 | -        | -                                                                                                                                                                               |  | -    | -       | -1.8 | -3.0847 |
| FBgn0036625 | 153654_at                 | CG4877  | -        | -                                                                                                                                                                               |  | -1.5 | -3.3666 | -    | -       |
| FBgn0036689 | 154559_at                 | CG7730  | -        | -                                                                                                                                                                               |  | -1.8 | -4.0665 | -    | -       |
| FBgn0036863 | 154347_at                 | CG9670  | fal      | -                                                                                                                                                                               |  | -1.9 | -3.1217 | -    | -       |
| FBgn0036927 | 149085_at                 | CG7433  | -        | -                                                                                                                                                                               |  | -1.8 | -5.0221 | -    | -       |
| FBgn0036980 | 154298_at                 | CG5701  | RhoBTB   | GTPase activity                                                                                                                                                                 |  | -1.6 | -3.4086 | -    | -       |
| FBgn0037095 | 149186_at                 | CG7184  | Mkm1     | -                                                                                                                                                                               |  | -1.6 | -2.8925 | -    | -       |
| FBgn0037327 | 149333_at                 | CG2087  | PEK      | eukaryotic elongation factor-2 kinase activity / protein kinase activity / receptor signaling protein serine/threonine kinase activity / translation initiation factor activity |  | -1.6 | -3.7676 | -    | -       |
| FBgn0037353 | 155055_at                 | CG31549 | -        | oxidoreductase activity / structural constituent of cytoskeleton / structural molecule activity                                                                                 |  | -1.8 | -3.7229 | -    | -       |
| FBgn0037424 | 149389_at                 | CG1157  | Osi15    | -                                                                                                                                                                               |  | -    | -       | -2.2 | -6.4489 |
| FBgn0037430 | 149395_at                 | CG15188 | Osi20    | -                                                                                                                                                                               |  | -    | -       | -2.0 | -3.5996 |
| FBgn0037614 | 149520_at                 | CG8116  | -        | -                                                                                                                                                                               |  | -1.7 | -3.0106 | -    | -       |
| FBgn0037696 | 141293_at                 | CG9362  | -        | glutathione transferase activity / maleylacetoacetate isomerase activity / transferase activity                                                                                 |  | -1.5 | -3.3276 | -    | -       |
| FBgn0037844 | 153457_at                 | CG4570  | -        | -                                                                                                                                                                               |  | -1.5 | -5.0737 | -    | -       |
| FBgn0037930 | 142488_s_at               | CG14715 | -        | FK506 binding / peptidyl-prolyl cis-trans isomerase activity / protein tyrosine phosphatase activity / receptor activity / transcription regulator activity                     |  | -1.6 | -4.108  | -1.7 | -4.8033 |
| FBgn0038013 | 153948_at                 | CG10038 | -        | -                                                                                                                                                                               |  | -1.8 | -4.2027 | -    | -       |
| FBgn0038059 | 149782_at                 | CG6489  | Hsp70Bc  | -                                                                                                                                                                               |  | -    | -       | -2.9 | -7.8376 |
| FBgn0038256 | 155074_at                 | CG7530  | -        | -                                                                                                                                                                               |  | -2.0 | -3.5636 | -    | -       |
| FBgn0038478 | 141516_at                 | CG5148  | -        | -                                                                                                                                                                               |  | -1.5 | -3.5919 | -    | -       |
| FBgn0038771 | 151914_at                 | CG4390  | -        | hydrolase activity / hydrolase activity, acting on ester bonds                                                                                                                  |  | -1.7 | -4.9434 | -    | -       |
| FBgn0038772 | 154702_at                 | CG4973  | -        | -                                                                                                                                                                               |  | -1.6 | -3.1235 | -    | -       |
| FBgn0038973 | 150369_at                 | CG18594 | -        | kinase inhibitor activity / kinase regulator activity                                                                                                                           |  | -    | -       | -1.7 | -4.6574 |
| FBgn0039052 | 150424_at                 | CG6733  | -        | NOT aminoacylase activity                                                                                                                                                       |  | -    | -       | -2.2 | -3.135  |
| FBgn0039251 | 150539_at                 | CG17462 | -        | nucleic acid binding / sigma DNA polymerase activity                                                                                                                            |  | -2.2 | -3.8806 | -    | -       |
| FBgn0039434 | 150663_r_at / 150662_l_at | CG5468  | -        | -                                                                                                                                                                               |  | -    | -       | -1.6 | -4.0992 |
| FBgn0039436 | 150665_s_at               | CG6478  | -        | -                                                                                                                                                                               |  | -    | -       | -2.0 | -7.282  |
| FBgn0039658 | 154723_at                 | CG11956 | SP1029   | aminopeptidase activity / metalloproteinase activity / NOT aminoacylase activity / receptor activity                                                                            |  | -1.5 | -3.1247 | -    | -       |
| FBgn0039777 | 150893_f_at               | CG2229  | Jon99Fii | elastase activity / NOT serine-type endopeptidase activity / serine-type endopeptidase activity                                                                                 |  | -    | -       | -3.3 | -4.6011 |
| FBgn0039778 | 141369_at                 | CG18030 | Jon99Fi  | elastase activity / NOT serine-type endopeptidase activity / serine-type endopeptidase activity                                                                                 |  | -    | -       | -7.6 | -5.2596 |
| FBgn0039851 | 151691_at                 | CG12063 | -        | -                                                                                                                                                                               |  | -    | -       | -2.3 | -3.3317 |
| FBgn0039888 | 150964_at                 | CG1487  | krz      | -                                                                                                                                                                               |  | -1.6 | -4.6981 | -    | -       |
| FBgn0039930 | 150994_at                 | CG11077 | -        | -                                                                                                                                                                               |  | -2.0 | -3.1131 | -    | -       |
| FBgn0040549 | 151036_f_at               | CG5834  | Hsp70Bbb | -                                                                                                                                                                               |  | -1.5 | -2.9472 | -    | -       |
| FBgn0040874 | 151347_i_at               | CG15600 | -        | -                                                                                                                                                                               |  | -1.6 | -3.4253 | -    | -       |
| FBgn0040946 | 154370_at                 | CG14033 | -        | -                                                                                                                                                                               |  | -1.7 | -5.0616 | -    | -       |
| FBgn0040981 | 151442_at                 | CG4482  | mol      | -                                                                                                                                                                               |  | -1.9 | -4.3917 | -    | -       |

Table S3. Genes responsive to Antp induction

Up-regulated genes:

| FB code     | Affy identifier | CG Numbers | Synonyms | Description / Molecular function                                                                               | Fold change st11 | t-value st11 | Fold change st12 | t-value st12 |
|-------------|-----------------|------------|----------|----------------------------------------------------------------------------------------------------------------|------------------|--------------|------------------|--------------|
| FBgn0000044 | 153531_at       | CG10067    | Act57B   | glucuronosyltransferase activity / structural constituent of cytoskeleton                                      | 1,6              | 3,4052       | -                | -            |
| FBgn0000055 | 151802_at       | CG3481     | Adh      | -                                                                                                              | 2,1              | 7,288        | -                | -            |
| FBgn0000116 | 152383_at       | CG32031    | Argk     | -                                                                                                              | 1,9              | 3,1111       | -                | -            |
| FBgn0000166 | 142838_at       | CG1034     | bcd      | morphogen activity / specific RNA polymerase II transcription factor activity / translation regulator activity | -                | -            | 1,6              | 3,1765       |
| FBgn0000216 | 143088_at       | CG3096     | Brd      | calmodulin inhibitor activity                                                                                  | -                | -            | 3,0              | 11,0901      |
| FBgn0000299 | 153378_at       | CG4145     | Cg25C    | extracellular matrix structural constituent / structural molecule activity                                     | 1,6              | 2,8972       | -                | -            |

|             |                       |         |           |                                                                                                                                             |      |        |      |         |
|-------------|-----------------------|---------|-----------|---------------------------------------------------------------------------------------------------------------------------------------------|------|--------|------|---------|
| FBgn0000405 | 154177_at             | CG3510  | CycB      | cyclin-dependent protein kinase regulator activity / kinase activator activity                                                              | -    | -      | 1,7  | 4,3809  |
| FBgn0000406 | 151932_at             | CG13279 | Cyt-b5-r  | electron transporter activity / electron transporter activity / oxidoreductase activity                                                     | -    | -      | 1,7  | 4,3044  |
| FBgn0000448 | 143123_at             | CG33183 | Hr46      | ligand-dependent nuclear receptor activity / transcription factor activity                                                                  | 2,0  | 3,0319 | -    | -       |
| FBgn0001254 | 153951_at             | CG1934  | ImpE2     | -                                                                                                                                           | 2,7  | 5,2104 | -    | -       |
| FBgn0001256 | 141386_at             | CG10717 | ImpL1     | -                                                                                                                                           | 2,5  | 4,8742 | -    | -       |
| FBgn0002629 | 143251_at             | CG6099  | m4        | -                                                                                                                                           | -    | -      | 2,3  | 6,1214  |
| FBgn0002631 | 143252_at             | CG6096  | HLHm5     | DNA binding / specific transcriptional repressor activity / transcription factor activity                                                   | -    | -      | 3,4  | 8,3305  |
| FBgn0002673 | 153947_at             | CG4965  | twe       | protein tyrosine phosphatase activity / protein tyrosine/serine/threonine phosphatase activity                                              | -    | -      | 1,6  | 3,0993  |
| FBgn0002772 | 143264_at             | CG5596  | Mlc1      | ATPase activity, coupled / microfilament motor activity / NOT calcium ion binding                                                           | 3,3  | 6,8014 | -    | -       |
| FBgn0002773 | 143265_at             | CG2184  | Mlc2      | ATPase activity, coupled / calcium ion binding / calmodulin binding / microfilament motor activity                                          | 3,0  | 6,3953 | -    | -       |
| FBgn0002924 | 154464_at             | CG7831  | ncd       | microtubule motor activity / minus-end-directed microtubule motor activity / structural constituent of cytoskeleton                         | -    | -      | 1,6  | 4,4635  |
| FBgn0003162 | 154812_at             | CG9441  | Pu        | GTP cyclohydrolase I activity                                                                                                               | 1,8  | 3,5606 | -    | -       |
| FBgn0004169 | 142555_at             | CG7107  | up        | tropomyosin binding                                                                                                                         | 3,0  | 4,7803 | -    | -       |
| FBgn0005630 | 143561_at             | CG12052 | Iola      | RNA polymerase II transcription factor activity / specific RNA polymerase II transcription factor activity                                  | -    | -      | 1,6  | 3,8205  |
| FBgn0005683 | 153746_at             | CG5354  | pie       | -                                                                                                                                           | -    | -      | 1,8  | 2,9719  |
| FBgn0010423 | 143622_at             | CG9073  | TpnC47D   | calcium ion binding / calmodulin binding                                                                                                    | 2,9  | 4,4162 | -    | -       |
| FBgn0010424 | 143623_at             | CG7930  | TpnC73F   | calcium ion binding / calmodulin binding                                                                                                    | 2,9  | 3,5013 | -    | -       |
| FBgn0010470 | 152208_at             | CG9847  | Fkbp13    | FK506 binding / peptidyl-prolyl cis-trans isomerase activity                                                                                | 2,0  | 3,2205 | -    | -       |
| FBgn0011653 | 141377_at             | CG15002 | mas       | NOT peptidase activity / NOT serine-type endopeptidase activity                                                                             | 2,7  | 3,5384 | -    | -       |
| FBgn0011706 | 143680_at             | CG4319  | rpr       | -                                                                                                                                           | 2,3  | 4,3474 | 1,7  | 3,4519  |
| FBgn0011823 | 141339_at             | CG4799  | Pen       | protein carrier activity                                                                                                                    | -    | -      | 1,5  | 3,0819  |
| FBgn0012037 | 153728_at             | CG8827  | Ance      | peptidyl-dipeptidase A activity / zinc ion binding                                                                                          | -    | -      | 1,6  | 3,9146  |
| FBgn0013772 | 142189_at             | CG10248 | Cyp6a8    | electron transporter activity / oxidoreductase activity                                                                                     | -    | -      | 2,0  | 3,9181  |
| FBgn0014011 | 153313_at             | CG8556  | Rac2      | GTPase activity                                                                                                                             | 1,6  | 3,2321 | -    | -       |
| FBgn0014032 | 151950_at             | CG12117 | Sptr      | sepiapterin reductase activity                                                                                                              | -    | -      | 1,8  | 2,9455  |
| FBgn0014469 | 154078_at             | CG2060  | Cyp4e2    | electron transporter activity / oxidoreductase activity                                                                                     | 2,3  | 5,4391 | 2,1  | 7,5308  |
| FBgn0015391 | 154348_at             | CG11397 | glu       | chromatin binding / DNA binding / nucleotide binding                                                                                        | -    | -      | 1,6  | 3,3916  |
| FBgn0015926 | 153153_at             | CG6157  | dah       | -                                                                                                                                           | -    | -      | 1,8  | 4,6455  |
| FBgn0016034 | 153959_at             | CG11254 | mael      | -                                                                                                                                           | -    | -      | 1,8  | 3,2052  |
| FBgn0016070 | 154516_at             | CG5263  | smq       | mRNA 3'-UTR binding / protein binding / RNA binding / translation repressor activity / translation repressor activity, nucleic acid binding | -    | -      | 1,9  | 5,1889  |
| FBgn0020766 | 154396_at             | CG13348 | Aats-phe  | phenylalanine-tRNA ligase activity                                                                                                          | 1,8  | 3,583  | -    | -       |
| FBgn0021748 | 152922_at             | CG6775  | rg        | protein kinase A binding                                                                                                                    | 1,5  | 2,9172 | -    | -       |
| FBgn0023023 | 153396_at             | CG1411  | -         | -                                                                                                                                           | 2,1  | 3,8122 | -    | -       |
| FBgn0023177 | 143976_at             | CG32505 | Pp4-19C   | protein serine/threonine phosphatase activity                                                                                               | -    | -      | 1,6  | 3,1145  |
| FBgn0023513 | 143991_at             | CG14803 | -         | -                                                                                                                                           | -    | -      | 1,5  | 3,13    |
| FBgn0023520 | 152934_at             | CG3857  | -         | -                                                                                                                                           | 5,2  | 8,7498 | 6,9  | 11,9386 |
| FBgn0023528 | 153287_at             | CG2924  | -         | transferase activity / ubiquitin conjugating enzyme activity                                                                                | -    | -      | 1,6  | 3,0625  |
| FBgn0023546 | 144004_at             | CG16902 | Hr4       | ligand-dependent nuclear receptor activity / molecular_function unknown / transcription regulator activity                                  | 2,7  | 3,7154 | -    | -       |
| FBgn0024921 | 142581_at             | CG7398  | Trn       | protein carrier activity / structural molecule activity                                                                                     | -    | -      | 1,8  | 3,1014  |
| FBgn0024984 | 153908_at             | CG3457  | -         | -                                                                                                                                           | -    | -      | 1,6  | 3,1054  |
| FBgn0025454 | 152900_at             | CG8453  | Cyp6g1    | electron transporter activity / oxidoreductase activity                                                                                     | -    | -      | 1,5  | 3,5612  |
| FBgn0025885 | 153296_at             | CG11143 | Inos      | -                                                                                                                                           | -    | -      | 2,1  | 4,5171  |
| FBgn0026077 | 153539_at             | CG10287 | Gasp      | chitin binding / structural constituent of peritrophic membrane (sensu Insecta)                                                             | 3,1  | 5,0214 | -    | -       |
| FBgn0026629 | 153839_at             | CG6072  | sra       | receptor binding                                                                                                                            | -    | -      | 1,8  | 3,7476  |
| FBgn0026871 | 144162_at             | CG14781 | -         | -                                                                                                                                           | -    | -      | 1,6  | 3,2601  |
| FBgn0027521 | 154041_at             | CG3679  | -         | -                                                                                                                                           | -    | -      | 1,8  | 2,9465  |
| FBgn0027527 | 144185_at             | CG1151  | Osi6      | -                                                                                                                                           | 2,2  | 5,2627 | -    | -       |
| FBgn0027547 | 152350_at             | CG1927  | -         | -                                                                                                                                           | -    | -      | 1,6  | 3,9127  |
| FBgn0027570 | 152128_at             | CG9761  | Nep2      | endothelin-converting enzyme activity / metalloendopeptidase activity / metallopeptidase activity                                           | 2,3  | 2,823  | -    | -       |
| FBgn0027606 | 151864_at             | CG12787 | hoe1      | cation transporter activity / L-tyrosine transporter activity / transporter activity                                                        | -    | -      | 1,9  | 3,957   |
| FBgn0027783 | 153548_at             | CG10212 | SMC2      | chromatin binding / DNA binding                                                                                                             | -    | -      | 1,6  | 3,6068  |
| FBgn0027889 | 153644_at             | CG6386  | ball      | histone-threonine kinase activity / protein kinase activity / protein serine/threonine kinase activity                                      | -    | -      | 1,6  | 4,1681  |
| FBgn0027890 | 153626_at             | CG4584  | dUTPase   | -                                                                                                                                           | -    | -      | 1,5  | 3,2008  |
| FBgn0027949 | 154597_at             | CG10364 | msb1      | molecular_function unknown                                                                                                                  | -    | -      | 1,6  | 4,2379  |
| FBgn0028420 | 154607_at             | CG18783 | Kr-h1     | transcription factor activity                                                                                                               | 2,6  | 3,5812 | -    | -       |
| FBgn0028469 | 154424_at             | CG8062  | -         | monocarboxylic acid transporter activity                                                                                                    | -    | -      | 1,6  | 2,963   |
| FBgn0029517 | 144338_at             | CG13377 | -         | 3-hydroxybutyrate dehydrogenase activity                                                                                                    | 2,1  | 3,6863 | -    | -       |
| FBgn0029865 | 154623_at             | CG15893 | -         | -                                                                                                                                           | -    | -      | 1,9  | 3,0276  |
| FBgn0029876 | 151850_at             | CG3960  | -         | actin binding / structural constituent of cytoskeleton                                                                                      | 1,7  | 4,0152 | -    | -       |
| FBgn0030079 | 144724_at             | CG7267  | -         | -                                                                                                                                           | 1,9  | 3,1842 | -    | -       |
| FBgn0030186 | 154400_at             | CG2962  | -         | -                                                                                                                                           | 2,7  | 4,876  | -    | -       |
| FBgn0030187 | 154819_at             | CG2961  | Ipod      | -                                                                                                                                           | 2,3  | 5,253  | -    | -       |
| FBgn0030336 | 154432_at             | CG1578  | -         | -                                                                                                                                           | -    | -      | 1,6  | 2,9265  |
| FBgn0030390 | 144937_at             | CG15731 | -         | -                                                                                                                                           | 4,8  | 7,1126 | -    | -       |
| FBgn0030436 | 144973_at             | CG4396  | fne       | pre-mRNA splicing factor activity / RNA binding                                                                                             | 2,2  | 3,7982 | -    | -       |
| FBgn0030653 | 153970_at             | CG7860  | -         | asparaginase activity                                                                                                                       | 2,4  | 4,2801 | -    | -       |
| FBgn0030803 | 153983_at             | CG4880  | -         | -                                                                                                                                           | -    | -      | 1,9  | 3,8832  |
| FBgn0030980 | 145340_at             | CG7406  | -         | -                                                                                                                                           | 1,5  | 4,6851 | -    | -       |
| FBgn0031097 | 151712_at / 142891_at | CG17052 | -         | structural constituent of peritrophic membrane (sensu Insecta)                                                                              | 2,3  | 4,1555 | -    | -       |
| FBgn0031313 | 154669_at             | CG5080  | -         | -                                                                                                                                           | 3,1  | 8,5617 | -    | -       |
| FBgn0031434 | 145649_at             | CG3227  | insv      | -                                                                                                                                           | -    | -      | 1,6  | 4,0844  |
| FBgn0031629 | 145779_at             | CG3244  | -         | -                                                                                                                                           | 2,7  | 2,872  | -    | -       |
| FBgn0031878 | 145935_at             | CG9188  | sip2      | -                                                                                                                                           | 2,9  | 3,4343 | 1,9  | 4,6846  |
| FBgn0031908 | 153932_at             | CG5177  | -         | trehalose-phosphatase activity                                                                                                              | 2,9  | 3,4343 | -    | -       |
| FBgn0031931 | 145970_at             | CG7052  | Tepll     | antibacterial humoral response (sensu Protostomia)                                                                                          | 1,8  | 3,3383 | -    | -       |
| FBgn0031964 | 145995_at             | CG33121 | -         | serine-type endopeptidase inhibitor activity / serine-type endopeptidase inhibitor activity                                                 | 47,4 | 8,3236 | 41,8 | 13,2306 |
| FBgn0031970 | 152154_at             | CG7227  | -         | scavenger receptor activity                                                                                                                 | 2,0  | 3,2044 | -    | -       |
| FBgn0032105 | 142833_at             | CG4454  | Borr      | -                                                                                                                                           | -    | -      | 1,6  | 5,3035  |
| FBgn0032262 | 151742_at             | CG7384  | -         | -                                                                                                                                           | -    | -      | 1,8  | 3,7597  |
| FBgn0032283 | 146182_at             | CG7296  | -         | -                                                                                                                                           | 2,2  | 6,0908 | -    | -       |
| FBgn0032400 | 142988_at             | CG6770  | -         | -                                                                                                                                           | 3,0  | 4,3419 | -    | -       |
| FBgn0032414 | 146274_at             | CG17211 | -         | -                                                                                                                                           | 2,4  | 3,6556 | -    | -       |
| FBgn0032489 | 146318_at             | CG15480 | -         | -                                                                                                                                           | -    | -      | 1,8  | 3,5548  |
| FBgn0032610 | 154661_at             | CG31991 | mdy       | aspartate-tRNA ligase activity / diacylglycerol O-acyltransferase activity / RNA binding / sterol O-acyltransferase activity                | 1,6  | 2,9855 | -    | -       |
| FBgn0032785 | 141465_at             | CG10026 | -         | carrier activity / retinal binding / tocopherol binding                                                                                     | 2,0  | 4,5707 | -    | -       |
| FBgn0032803 | 146500_at             | CG13082 | -         | -                                                                                                                                           | 2,9  | 5,5217 | -    | -       |
| FBgn0032820 | 151797_at             | CG31692 | fbp       | fructose-bisphosphatase activity                                                                                                            | 2,6  | 3,7275 | -    | -       |
| FBgn0032897 | 146539_at             | CG9336  | -         | -                                                                                                                                           | 4,0  | 7,3808 | -    | -       |
| FBgn0032899 | 152155_at             | CG9338  | -         | -                                                                                                                                           | 2,4  | 4,4162 | -    | -       |
| FBgn0032962 | 146598_at             | CG31612 | -         | nucleic acid binding                                                                                                                        | -    | -      | 1,7  | 3,2455  |
| FBgn0033033 | 146650_at             | CG11066 | scarface  | NOT serine-type endopeptidase activity                                                                                                      | 1,5  | 3,5385 | -    | -       |
| FBgn0033125 | 146708_at             | CG12846 | Tsp42Ed   | -                                                                                                                                           | 2,8  | 4,0144 | -    | -       |
| FBgn0033144 | 141404_at             | CG12172 | Spn43Aa   | serine-type endopeptidase inhibitor activity                                                                                                | 1,7  | 2,942  | -    | -       |
| FBgn0033156 | 141608_at             | CG12165 | Incenp    | -                                                                                                                                           | -    | -      | 1,7  | 3,3265  |
| FBgn0033180 | 152970_at             | CG11140 | Aldh-III  | aldehyde dehydrogenase activity                                                                                                             | 1,7  | 3,3525 | -    | -       |
| FBgn0033242 | 146780_at             | CG2916  | Sep5      | GTPase activity / structural constituent of cytoskeleton                                                                                    | -    | -      | 1,9  | 3,3472  |
| FBgn0033509 | 154737_at             | CG12908 | Ndg       | structural molecule activity                                                                                                                | 1,6  | 3,8215 | -    | -       |
| FBgn0033576 | 146978_s_at           | CG30489 | Cyp12d1-p | electron transporter activity / electron transporter activity / oxidoreductase activity / oxidoreductase activity                           | 1,9  | 3,4056 | 1,5  | 2,9028  |
| FBgn0033614 | 147010_at             | CG13208 | Obp47b    | -                                                                                                                                           | -    | -      | 1,5  | 2,9576  |
| FBgn0033631 | 142399_at             | CG9027  | -         | -                                                                                                                                           | -    | -      | 3,1  | 4,9141  |
| FBgn0033635 | 154391_at             | CG7777  | -         | binding / carrier activity / water transporter activity                                                                                     | -    | -      | 2,5  | 3,4188  |
| FBgn0033757 | 147107_at             | CG8811  | muskelin  | -                                                                                                                                           | -    | -      | 1,7  | 2,874   |
| FBgn0033881 | 147175_at             | CG13345 | RacGAP50C | diacylglycerol binding / GTPase activator activity / Rho GTPase activator activity / signal transducer activity                             | -    | -      | 1,6  | 6,101   |
| FBgn0034016 | 147246_at             | CG8171  | dup       | -                                                                                                                                           | -    | -      | 1,6  | 4,14    |
| FBgn0034108 | 155081_at             | CG3767  | Jhl-26    | -                                                                                                                                           | 2,1  | 2,8323 | -    | -       |
| FBgn0034145 | 147321_at             | CG5065  | -         | oxidoreductase activity                                                                                                                     | 3,2  | 5,0546 | -    | -       |
| FBgn0034275 | 154837_at             | CG5002  | -         | high affinity sulfate permease activity / transporter activity                                                                              | -    | -      | 1,5  | 2,9007  |
| FBgn0034290 | 142954_at             | CG5773  | -         | -                                                                                                                                           | 2,6  | 3,4785 | 2,1  | 3,4127  |
| FBgn0034331 | 147433_at             | CG15067 | -         | -                                                                                                                                           | 2,8  | 3,3706 | -    | -       |
| FBgn0034343 | 142480_at             | CG17534 | GstE9     | glutathione transferase activity                                                                                                            | -    | -      | 2,0  | 3,1661  |
| FBgn0034398 | 147469_at             | CG15098 | -         | -                                                                                                                                           | -    | -      | 1,8  | 4,5031  |

|             |                           |         |               |                                                                                                                                                                                                         |     |         |      |         |
|-------------|---------------------------|---------|---------------|---------------------------------------------------------------------------------------------------------------------------------------------------------------------------------------------------------|-----|---------|------|---------|
| FBgn0034514 | 147549_at                 | CG13427 | -             | -                                                                                                                                                                                                       | -   | -       | 2,9  | 9,2434  |
| FBgn0034736 | 147681_at                 | CG6018  | -             | carboxylesterase activity                                                                                                                                                                               | 1,7 | 3,1694  | -    | -       |
| FBgn0035077 | 154985_at                 | CG9083  | -             | -                                                                                                                                                                                                       | 9,4 | 9,069   | -    | -       |
| FBgn0035089 | 147903_at                 | CG9358  | Phk-3         | -                                                                                                                                                                                                       | 6,0 | 7,0235  | -    | -       |
| FBgn0035103 | 142735_at                 | CG7047  | -             | -                                                                                                                                                                                                       | 1,6 | 3,3439  | -    | -       |
| FBgn0035208 | 147969_at                 | CG9184  | -             | -                                                                                                                                                                                                       | 4,1 | 13,7014 | -    | -       |
| FBgn0035252 | 153945_at                 | CG7970  | -             | -                                                                                                                                                                                                       | -   | -       | 1,5  | 3,0982  |
| FBgn0035434 | 148103_at                 | CG10812 | dro5          | -                                                                                                                                                                                                       | 2,7 | 8,444   | 1,5  | 4,5917  |
| FBgn0035547 | 148178_at                 | CG15022 | -             | -                                                                                                                                                                                                       | 1,5 | 4,5187  | -    | -       |
| FBgn0035621 | 154354_at                 | CG10591 | -             | -                                                                                                                                                                                                       | 4,5 | 10,437  | -    | -       |
| FBgn0035640 | 148237_at                 | CG17498 | mad2          | -                                                                                                                                                                                                       | -   | -       | 1,7  | 3,6125  |
| FBgn0035717 | 152709_at                 | CG10078 | Prat2         | -                                                                                                                                                                                                       | -   | -       | 2,4  | 4,2194  |
| FBgn0035735 | 148301_at                 | CG8640  | -             | structural constituent of cuticle (sensu Insecta)                                                                                                                                                       | 2,5 | 4,2321  | -    | -       |
| FBgn0035798 | 154595_at                 | CG7526  | -             | kinase activity / protein kinase activity / receptor activity / structural molecule activity / transmembrane receptor protein kinase activity / transmembrane receptor protein tyrosine kinase activity | 1,6 | 3,2101  | -    | -       |
| FBgn0035811 | 154110_at                 | CG12262 | -             | acyl-CoA dehydrogenase activity                                                                                                                                                                         | -   | -       | 1,7  | 4,2506  |
| FBgn0035868 | 148390_at                 | CG7194  | -             | -                                                                                                                                                                                                       | -   | -       | 1,7  | 2,7814  |
| FBgn0035881 | 151795_at                 | CG7176  | ldh           | -                                                                                                                                                                                                       | 2,3 | 6,3322  | -    | -       |
| FBgn0036296 | 152168_at                 | CG10686 | -             | -                                                                                                                                                                                                       | -   | -       | 1,5  | 3,4641  |
| FBgn0036352 | 148705_at                 | CG14110 | -             | -                                                                                                                                                                                                       | 7,9 | 9,3395  | -    | -       |
| FBgn0036354 | 153557_at                 | CG10191 | -             | -                                                                                                                                                                                                       | -   | -       | 1,8  | 2,8556  |
| FBgn0036381 | 148725_at                 | CG8745  | -             | -                                                                                                                                                                                                       | 1,9 | 3,7139  | -    | -       |
| FBgn0036433 | 153786_at                 | CG9628  | -             | -                                                                                                                                                                                                       | 1,7 | 3,4094  | -    | -       |
| FBgn0036458 | 148773_s_at               | CG3396  | Ocho          | -                                                                                                                                                                                                       | -   | -       | 1,6  | 3,2335  |
| FBgn0036572 | 154763_at                 | CG5165  | Pgm           | -                                                                                                                                                                                                       | 1,6 | 3,1431  | -    | -       |
| FBgn0036616 | 148888_at                 | CG4893  | -             | molecular_function unknown                                                                                                                                                                              | 1,6 | 3,0594  | -    | -       |
| FBgn0036689 | 154559_at                 | CG7730  | -             | -                                                                                                                                                                                                       | -   | -       | 1,9  | 3,1112  |
| FBgn0036800 | 154409_at                 | CG6897  | -             | -                                                                                                                                                                                                       | -   | -       | 1,7  | 2,7988  |
| FBgn0036824 | 152151_at                 | CG3902  | -             | short-branched-chain-acyl-CoA dehydrogenase activity                                                                                                                                                    | 1,5 | 3,1798  | -    | -       |
| FBgn0036901 | 141311_at                 | CG8756  | LCBP1         | -                                                                                                                                                                                                       | 2,7 | 5,7131  | -    | -       |
| FBgn0036902 | 149070_at                 | CG32209 | -             | -                                                                                                                                                                                                       | 2,6 | 3,4492  | -    | -       |
| FBgn0036980 | 154298_at                 | CG5701  | RhoBTB        | GTPase activity                                                                                                                                                                                         | -   | -       | 1,8  | 3,5055  |
| FBgn0037083 | 141375_at                 | CG5656  | -             | alkaline phosphatase activity / nucleotide phosphatase activity                                                                                                                                         | 3,5 | 6,846   | -    | -       |
| FBgn0037128 | 149208_at                 | CG14572 | -             | -                                                                                                                                                                                                       | 2,5 | 5,2042  | 2,4  | 5,7206  |
| FBgn0037211 | 142644_s_at               | CG12414 | nAcRalpha-80B | acetylcholine receptor activity / nicotinic acetylcholine-activated cation-selective channel activity                                                                                                   | -   | -       | 2,1  | 3,0786  |
| FBgn0037224 | 153953_at                 | CG14639 | -             | -                                                                                                                                                                                                       | 3,9 | 5,2734  | -    | -       |
| FBgn0037236 | 153298_at                 | CG9772  | -             | -                                                                                                                                                                                                       | -   | -       | 1,5  | 3,1441  |
| FBgn0037414 | 149380_at                 | CG1153  | Osi7          | -                                                                                                                                                                                                       | 2,6 | 4,5321  | -    | -       |
| FBgn0037424 | 149389_at                 | CG1157  | Osi15         | -                                                                                                                                                                                                       | 2,9 | 4,6513  | -    | -       |
| FBgn0037447 | 154993_at                 | CG2330  | -             | extracellular matrix structural constituent / structural molecule activity                                                                                                                              | 4,1 | 4,1761  | -    | -       |
| FBgn0037624 | 155060_at                 | CG8223  | -             | -                                                                                                                                                                                                       | -   | -       | 1,5  | 3,0751  |
| FBgn0037664 | 154972_at                 | CG8420  | -             | -                                                                                                                                                                                                       | 3,1 | 4,8138  | -    | -       |
| FBgn0037844 | 153457_at                 | CG4570  | -             | -                                                                                                                                                                                                       | -   | -       | 1,8  | 4,1898  |
| FBgn0037913 | 151826_at                 | CG6783  | -             | carrier activity / fatty acid binding / tricarboxylate carrier activity                                                                                                                                 | 2,0 | 4,6346  | -    | -       |
| FBgn0037977 | 153367_at                 | CG3132  | Ect3          | beta-galactosidase activity                                                                                                                                                                             | -   | -       | 1,9  | 3,0429  |
| FBgn0037992 | 155035_at                 | CG4702  | -             | -                                                                                                                                                                                                       | 2,9 | 4,2575  | -    | -       |
| FBgn0038022 | 149757_at                 | CG4381  | GstD3         | glutathione transferase activity                                                                                                                                                                        | 1,8 | 2,9358  | -    | -       |
| FBgn0038028 | 149763_at                 | CG10035 | -             | -                                                                                                                                                                                                       | -   | -       | 9,5  | 12,1424 |
| FBgn0038151 | 149841_at                 | CG17044 | yellow-e2     | -                                                                                                                                                                                                       | 1,6 | 2,9186  | -    | -       |
| FBgn0038256 | 155074_at                 | CG7530  | -             | -                                                                                                                                                                                                       | -   | -       | 1,8  | 4,3604  |
| FBgn0038353 | 149968_at                 | CG5399  | -             | -                                                                                                                                                                                                       | -   | -       | 1,8  | 3,2691  |
| FBgn0038610 | 153033_at                 | CG7675  | -             | oxidoreductase activity, acting on CH-OH group of donors                                                                                                                                                | 4,2 | 6,2163  | -    | -       |
| FBgn0038613 | 142662_at                 | CG7678  | -             | hydrogen-exporting ATPase activity, phosphorylative mechanism                                                                                                                                           | -   | -       | 2,5  | 3,3753  |
| FBgn0038899 | 152554_at                 | CG31177 | -             | NOT membrane alanyl aminopeptidase activity / NOT membrane alanyl aminopeptidase activity / receptor activity / receptor activity                                                                       | -   | -       | 1,6  | 3,413   |
| FBgn0038914 | 150335_at                 | CG17820 | ffit          | -                                                                                                                                                                                                       | 2,2 | 4,0766  | 3,4  | 4,8255  |
| FBgn0039021 | 151680_at                 | CG31139 | -             | -                                                                                                                                                                                                       | -   | -       | 1,8  | 4,0298  |
| FBgn0039251 | 150539_at                 | CG17462 | -             | nucleic acid binding / sigma DNA polymerase activity                                                                                                                                                    | -   | -       | 2,1  | 2,9762  |
| FBgn0039448 | 150674_at                 | CG14243 | -             | -                                                                                                                                                                                                       | 2,6 | 3,7537  | -    | -       |
| FBgn0039638 | 153804_at                 | CG11881 | -             | -                                                                                                                                                                                                       | -   | -       | 1,5  | 2,8603  |
| FBgn0039728 | 154520_at                 | CG7896  | -             | receptor activity                                                                                                                                                                                       | 1,9 | 2,9229  | -    | -       |
| FBgn0040051 | 151038_at                 | CG11686 | -             | -                                                                                                                                                                                                       | 2,5 | 3,8999  | -    | -       |
| FBgn0040078 | 151195_i_at / 151196_r_at | CG15353 | -             | -                                                                                                                                                                                                       | 2,6 | 5,0083  | 1,8  | 6,029   |
| FBgn0040741 | 151217_at                 | CG14486 | Uhg1          | -                                                                                                                                                                                                       | 2   | 8,383   | 16,4 | 10,7872 |
| FBgn0040796 | 151266_at                 | CG13064 | -             | -                                                                                                                                                                                                       | 3,6 | 5,5516  | -    | -       |
| FBgn0040808 | 151283_s_at               | CG12487 | BobA          | -                                                                                                                                                                                                       | -   | -       | 2,3  | 5,3546  |
| FBgn0040946 | 154370_at                 | CG14033 | -             | -                                                                                                                                                                                                       | -   | -       | 1,7  | 3,4912  |
| FBgn0040981 | 151442_at                 | CG4482  | mol           | -                                                                                                                                                                                                       | -   | -       | 1,9  | 6,0578  |
| FBgn0040984 | 151444_at                 | CG4440  | -             | -                                                                                                                                                                                                       | -   | -       | 1,9  | 5,4557  |

## Downregulated genes:

| FB code     | Affy identifier           | CG Numbers | Synonyms  | Description / Molecular Function                                                                                                                                                            | t-value st11 | t-value st12 | Fold change st11 | Fold change st12 |
|-------------|---------------------------|------------|-----------|---------------------------------------------------------------------------------------------------------------------------------------------------------------------------------------------|--------------|--------------|------------------|------------------|
| FBgn0000075 | 143066_at                 | CG10501    | amd       | aromatic-L-amino-acid decarboxylase activity / carboxy-lyase activity                                                                                                                       | -            | -            | -                | 2,0              |
| FBgn0000095 | 142814_at                 | CG1028     | Antp      | specific RNA polymerase II transcription factor activity                                                                                                                                    | -            | -            | -                | -1,9             |
| FBgn0000140 | 154866_at                 | CG6875     | asp       | microtubule binding / protein kinase activity                                                                                                                                               | -            | -            | -                | -                |
| FBgn0000163 | 143083_at                 | CG5055     | baz       | protein binding / protein kinase C binding / structural molecule activity                                                                                                                   | -1,8         | -3,1329      | -                | -                |
| FBgn0000165 | 151955_at                 | CG5779     | Bc        | -                                                                                                                                                                                           | -1,9         | -2,9753      | -                | -                |
| FBgn0000166 | 142838_at                 | CG1034     | bcd       | morphogen activity / specific RNA polymerase II transcription factor activity / translation regulator activity                                                                              | -            | -            | -                | -3,3             |
| FBgn0000180 | 155099_at                 | CG4722     | bib       | binding / carrier activity / water channel activity                                                                                                                                         | -1,6         | -3,0978      | -                | -                |
| FBgn0000261 | 143093_at                 | CG6871     | Cat       | antioxidant activity / catalase activity / heme binding / peroxidase activity                                                                                                               | -1,9         | -2,9311      | -                | -                |
| FBgn0000337 | 143103_at                 | CG1555     | cn        | -                                                                                                                                                                                           | -            | -            | -                | -1,5             |
| FBgn0000411 | 143116_at                 | CG5893     | D         | DNA bending activity / transcription factor activity                                                                                                                                        | -2,6         | -5,0028      | -                | -                |
| FBgn0000439 | 143122_at                 | CG2189     | Dfd       | RNA polymerase II transcription factor activity / transcription factor activity                                                                                                             | -1,9         | -3,7308      | -                | -                |
| FBgn0000636 | 143157_at                 | CG5803     | Fas3      | -                                                                                                                                                                                           | -1,5         | -2,8399      | -                | -                |
| FBgn0001148 | 143183_at                 | CG3388     | gsb       | specific RNA polymerase II transcription factor activity                                                                                                                                    | -            | -            | -                | -1,7             |
| FBgn0001224 | 153583_at                 | CG4463     | Hsp23     | actin binding                                                                                                                                                                               | -1,6         | -3,902       | -                | -                |
| FBgn0001226 | 153307_at                 | CG4466     | Hsp27     | -                                                                                                                                                                                           | -2,1         | -2,8465      | -                | -                |
| FBgn0001229 | 143196_at                 | CG4190     | Hsp67Bc   | -                                                                                                                                                                                           | -            | -            | -                | 2,0              |
| FBgn0001247 | 153407_at                 | CG5517     | Ide       | insulysin activity / zinc ion binding                                                                                                                                                       | -            | -            | -                | -1,8             |
| FBgn0002526 | 154252_at                 | CG10236    | LanA      | structural molecule activity                                                                                                                                                                | -2,0         | -3,046       | -2,0             | -3,2006          |
| FBgn0002561 | 143237_at                 | CG3839     | l(1)sc    | specific RNA polymerase II transcription factor activity / transcription factor activity                                                                                                    | -            | -            | -                | -1,7             |
| FBgn0002578 | 143245_at                 | CG8342     | m1        | serine-type endopeptidase inhibitor activity                                                                                                                                                | -2,0         | -6,4033      | -                | -                |
| FBgn0002629 | 143251_at                 | CG6099     | m4        | -                                                                                                                                                                                           | -            | -            | -                | -1,7             |
| FBgn0002631 | 143252_at                 | CG6096     | HLHm5     | DNA binding / specific transcriptional repressor activity / transcription factor activity                                                                                                   | -1,6         | -3,9084      | -                | -                |
| FBgn0002632 | 143253_at                 | CG8354     | m6        | -                                                                                                                                                                                           | -1,8         | -5,2045      | -                | -                |
| FBgn0002734 | 143260_at                 | CG8328     | HLHmdelta | DNA binding / specific transcriptional repressor activity / structural constituent of cuticle (sensu Insecta) / transcription factor activity                                               | -            | -            | -                | -1,5             |
| FBgn0002789 | 143271_at                 | CG4696     | Mp20      | actin binding / calcium ion binding / structural constituent of cytoskeleton                                                                                                                | -1,6         | -3,2187      | -                | -3,0828          |
| FBgn0002868 | 143276_at                 | CG9470     | MtnA      | metal ion binding                                                                                                                                                                           | -            | -            | -                | -1,8             |
| FBgn0003057 | 143296_at                 | CG10598    | -         | -                                                                                                                                                                                           | -            | -            | -                | -1,7             |
| FBgn0003082 | 143303_at                 | CG11205    | phr       | nucleic acid binding / nucleic acid binding                                                                                                                                                 | -            | -            | -                | -2,3             |
| FBgn0003189 | 142945_at                 | CG18572    | r         | aspartate carbamoyltransferase activity / carbamoyl-phosphate synthase (ammonia) activity / dihydroorotase activity / GDP binding / GTP binding / GTPase activity                           | 2,4          | 3,3605       | -                | -3,2484          |
| FBgn0003276 | 154098_at                 | CG3180     | RpII140   | DNA-directed RNA polymerase activity / nucleic acid binding                                                                                                                                 | -            | -            | -                | -1,5             |
| FBgn0003326 | 143333_at                 | CG17579    | sca       | receptor binding / signal transducer activity                                                                                                                                               | -1,5         | -5,7452      | -                | -                |
| FBgn0003356 | 143338_f_at               | CG31034    | Jon99Cii  | chymotrypsin activity / chymotrypsin activity / serine-type endopeptidase activity / serine-type endopeptidase activity / serine-type peptidase activity / serine-type peptidase activity   | -2,0         | -3,6049      | -                | -                |
| FBgn0003357 | 143340_f_at / 143339_i_at | CG31362    | Jon99Ciii | chymotrypsin activity / chymotrypsin activity / serine-type endopeptidase activity / serine-type endopeptidase activity / serine-type peptidase activity / serine-type peptidase activity   | -            | -            | -                | -18,3            |
| FBgn0003411 | 143353_at                 | CG1641     | sisA      | protein heterodimerization activity / transcription factor activity                                                                                                                         | -            | -            | -                | -14,9            |
| FBgn0003430 | 151981_at                 | CG16738    | slp1      | RNA polymerase II transcription factor activity / transcription factor activity                                                                                                             | -1,6         | -3,5437      | -                | -                |
| FBgn0003862 | 143384_at                 | CG8651     | trx       | contributes to histone lysine N-methyltransferase activity (H3-K4 specific) / DNA binding / histone lysine N-methyltransferase activity (H3-K4 specific) / transcription regulator activity | -1,6         | -2,8903      | -                | -                |
| FBgn0003867 | 143387_at                 | CG6705     | tsl       | torso binding                                                                                                                                                                               | -1,9         | -4,5719      | -2,0             | -3,7689          |
| FBgn0004009 | 143414_at                 | CG4889     | wg        | frizzled-2 binding / morphogen activity / Notch binding / receptor binding / signal transducer activity                                                                                     | -            | -            | -                | -1,6             |
| FBgn0004197 | 143438_at                 | CG6127     | Ser       | epidermal growth factor receptor binding / Notch binding / receptor binding / signal transducer activity                                                                                    | -2,5         | -3,0408      | -                | -3,0733          |
|             |                           |            |           |                                                                                                                                                                                             | -            | -            | 1,9              | 5,4557           |

|             |                       |         |            |                                                                                                                                                                                                                                                                     |      |         |      |          |
|-------------|-----------------------|---------|------------|---------------------------------------------------------------------------------------------------------------------------------------------------------------------------------------------------------------------------------------------------------------------|------|---------|------|----------|
| FBgn0004243 | I54201_at             | CG2092  | scra       | actin binding / microtubule binding / structural constituent of cytoskeleton                                                                                                                                                                                        | -1,6 | -3,3318 | -    | -        |
| FBgn0004378 | I53851_at             | CG9191  | Klp61F     | microtubule motor activity / motor activity / plus-end-directed microtubule motor activity / structural constituent of cytoskeleton                                                                                                                                 | -1,8 | -4,8104 | -    | -        |
| FBgn0004394 | I43457_at             | CG12287 | pdm2       | DNA binding / specific RNA polymerase II transcription factor activity                                                                                                                                                                                              | -1,7 | -3,6188 | -    | -        |
| FBgn0004425 | I43464_f_at           | CG1179  | LysB       | chitinase activity / lysozyme activity                                                                                                                                              | -1,8 | -3,6531 | -    | -        |
| FBgn0004427 | I43466_f_at           | CG9118  | LysD       | chitinase activity / lysozyme activity                                                                                                                                              | -2,6 | -3,9368 | -1,7 | -3,2124  |
| FBgn0004428 | I43467_f_at           | CG1180  | LysE       | chitinase activity / lysozyme activity                                                                                                                                              | -3,7 | -7,5174 | -2,1 | -2,878   |
| FBgn0004777 | I43509_at             | CG2342  | Ccp84Aq    | structural constituent of larval cuticle (sensu Insecta)                                                                                                                                                                                                            | -    | -       | -1,6 | -3,9788  |
| FBgn0010228 | I43588_at             | CG17921 | Hmg2       | chromatin binding / DNA binding / transcription regulator activity                                                                                                                                                                                                  | -1,8 | -4,1546 | -2,1 | -4,331   |
| FBgn0010314 | I53961_at             | CG3738  | Cks30A     | cyclin-dependent protein kinase activity / cyclin-dependent protein kinase regulator activity / protein serine/threonine kinase activity                                                                                                                            | -    | -       | -    | -        |
| FBgn0010359 | I43603_i_at           | CG30028 | gammaTry   | NOT serine-type endopeptidase activity / trypsin activity / trypsin activity                                                                                                                                                                                        | -1,7 | -3,2957 | -    | -        |
| FBgn0010383 | I43606_at             | CG6816  | Cyp18a1    | electron transporter activity / oxidoreductase activity                                                                                                                                                                                                             | -    | -       | -2,8 | -4,2815  |
| FBgn0010397 | I54588_at             | CG10119 | LamC       | structural constituent of cytoskeleton                                                                                                                                                                                                                              | -    | -       | -2,2 | -3,3692  |
| FBgn0010425 | I43624_at             | CG18681 | epsilonTry | trypsin activity                                                                                                                                                                                                                                                    | -    | -       | -2,1 | -3,0781  |
| FBgn0011692 | I43677_at             | CG1258  | pav        | microtubule motor activity / structural constituent of cytoskeleton                                                                                                                                                                                                 | -2,0 | -3,8184 | -    | -        |
| FBgn0011704 | I42872_at             | CG8975  | Rnr5       | ribonucleoside-diphosphate reductase activity                                                                                                                                                                                                                       | -2,0 | -5,3436 | -    | -        |
| FBgn0011823 | I41339_at             | CG4799  | Pen        | protein carrier activity                                                                                                                                                                                                                                            | -1,6 | -4,2439 | -    | -        |
| FBgn0013263 | I42876_at             | CG33261 | Trl        | DNA binding / RNA polymerase II transcription factor activity / specific RNA polymerase II transcription factor activity                                                                                                                                            | -    | -       | -1,6 | -3,3083  |
| FBgn0013469 | I43712_at             | CG12296 | klu        | transcription factor activity                                                                                                                                                                                                                                       | -1,6 | -3,4459 | -    | -        |
| FBgn0014127 | I43751_at             | CG10726 | barr       | -                                                                                                                                                                                                                                                                   | -1,5 | -3,0917 | -    | -        |
| FBgn0015286 | I43790_at             | CG2849  | Rala       | GTPase activity                                                                                                                                                                                                                                                     | -1,8 | -2,8177 | -1,7 | -3,2916  |
| FBgn0015766 | I55091_at             | CG10596 | Msr-110    | -                                                                                                                                                                                                                                                                   | -    | -       | -2,1 | -3,1742  |
| FBgn0015929 | I43860_at             | CG1616  | dpa        | DNA binding / DNA helicase activity / DNA replication origin binding                                                                                                                                                                                                | -1,5 | -3,4492 | -    | -        |
| FBgn0016075 | I43868_at             | CG16858 | vkq        | extracellular matrix structural constituent                                                                                                                                                                                                                         | -    | -       | -2,8 | -3,613   |
| FBgn0016724 | I51538_s_at           | CG11064 | Rfa8p      | fatty acid binding / heme binding / microtubule binding / retinoid binding / structural molecule activity                                                                                                                                                           | -    | -       | -1,5 | -3,3124  |
| FBgn0017551 | I52549_at             | CG10800 | Rca1       | molecular function unknown                                                                                                                                                                                                                                          | -1,6 | -3,3883 | -    | -        |
| FBgn0019686 | I54411_at             | CG10895 | lok        | protein kinase activity / protein serine/threonine kinase activity / receptor signaling protein serine/threonine kinase activity                                                                                                                                    | -2,0 | -3,3316 | -    | -        |
| FBgn0020389 | I54327_at             | CG8363  | Paps       | nucleotide kinase activity                                                                                                                                                                                                                                          | -    | -       | -2,0 | -5,6063  |
| FBgn0020637 | I43935_s_at           | CG10534 | Lcp65Aq2   | structural constituent of larval cuticle (sensu Insecta) / structural constituent of larval cuticle (sensu Insecta)                                                                                                                                                 | -2,0 | -4,3156 | -1,8 | -7,3651  |
| FBgn0021748 | I52922_at             | CG6775  | rg         | protein kinase A binding                                                                                                                                                                                                                                            | -    | -       | -1,6 | -2,7884  |
| FBgn0022213 | I43953_at             | CG13281 | Cas        | importin-alpha export receptor activity                                                                                                                                                                                                                             | -2,1 | -3,131  | -    | -        |
| FBgn0024988 | I41607_at             | CG14801 | -          | exonuclease activity / exonuclease activity / nucleic acid binding                                                                                                                                                                                                  | -2,8 | -4,1375 | -    | -        |
| FBgn0025618 | I41313_at             | CG12311 | Pomt2      | dolichyl-phosphate-mannose-protein mannosyltransferase activity                                                                                                                                                                                                     | -    | -       | -1,9 | -2,8651  |
| FBgn0026063 | I44112_at             | CG17216 | KP78b      | protein kinase activity / protein kinase activity / protein serine/threonine kinase activity / protein serine/threonine kinase activity / receptor signaling protein serine/threonine kinase activity / receptor signaling protein serine/threonine kinase activity | -1,6 | -2,9731 | -    | -        |
| FBgn0026753 | I44156_at             | CG6213  | Vha13      | hydrogen-exporting ATPase activity, phosphorylative mechanism                                                                                                                                                                                                       | -    | -       | -1,5 | -4,0642  |
| FBgn0027500 | I42718_at             | CG17286 | -          | -                                                                                                                                                                                                                                                                   | -1,8 | -3,9491 | -    | -        |
| FBgn0027594 | I51918_s_at           | CG2086  | drpr       | extracellular matrix structural constituent / receptor activity                                                                                                                                                                                                     | -    | -       | -1,5 | -3,1825  |
| FBgn0027842 | I54586_at             | CG12891 | CPTI       | acetyltransferase activity / carnitine O-palmitoyltransferase activity                                                                                                                                                                                              | -    | -       | -1,5 | -3,055   |
| FBgn0027948 | I52738_at             | CG5000  | mssp       | microtubule binding / protein binding / structural constituent of cytoskeleton                                                                                                                                                                                      | -1,6 | -3,1346 | -    | -        |
| FBgn0028504 | I51847_at             | CG12182 | -          | -                                                                                                                                                                                                                                                                   | -1,6 | -2,8231 | -    | -        |
| FBgn0028905 | I44302_at             | CG32972 | -          | -                                                                                                                                                                                                                                                                   | -    | -       | -1,9 | -5,6682  |
| FBgn0029531 | I44348_at             | CG13362 | -          | -                                                                                                                                                                                                                                                                   | -    | -       | -2,0 | -5,4708  |
| FBgn0029556 | I52743_at             | CG14629 | -          | -                                                                                                                                                                                                                                                                   | -    | -       | -1,6 | -4,3489  |
| FBgn0029576 | I51685_r_at           | CG32813 | -          | -                                                                                                                                                                                                                                                                   | -    | -       | -1,8 | -2,9499  |
| FBgn0029650 | I44430_at             | CG3939  | -          | -                                                                                                                                                                                                                                                                   | -    | -       | -1,6 | -3,0217  |
| FBgn0029804 | I44549_at             | CG3097  | -          | carboxypeptidase A activity                                                                                                                                                                                                                                         | -1,7 | -2,8056 | -    | -        |
| FBgn0029939 | I53744_at             | CG9650  | -          | transcription regulator activity                                                                                                                                                                                                                                    | -1,7 | -4,1716 | -    | -        |
| FBgn0030040 | I44700_at             | CG15347 | -          | -                                                                                                                                                                                                                                                                   | -    | -       | -2,9 | -6,1432  |
| FBgn0030183 | I52303_at             | CG15309 | -          | molecular function unknown                                                                                                                                                                                                                                          | -    | -       | -2,0 | -3,7397  |
| FBgn0030241 | I53167_at             | CG11207 | feo        | receptor binding                                                                                                                                                                                                                                                    | -1,5 | -3,3173 | -    | -        |
| FBgn0030242 | I41492_at             | CG1655  | sofe       | receptor binding                                                                                                                                                                                                                                                    | -1,8 | -2,8788 | -    | -        |
| FBgn0030305 | I44879_at             | CG1749  | -          | Mo-molybdopterin cofactor sulfurase activity                                                                                                                                                                                                                        | -    | -       | -1,5 | -2,8029  |
| FBgn0030436 | I44973_at             | CG4396  | fne        | pre-mRNA splicing factor activity / RNA binding                                                                                                                                                                                                                     | -    | -       | -1,6 | -4,4048  |
| FBgn0030484 | I52675_at             | CG1681  | -          | glutathione transferase activity                                                                                                                                                                                                                                    | -    | -       | -1,6 | -4,3081  |
| FBgn0030557 | I54460_at             | CG12047 | imud       | -                                                                                                                                                                                                                                                                   | -2,0 | -2,9859 | -    | -        |
| FBgn0031221 | I45511_at             | CG3164  | -          | ATPase activity, coupled to transmembrane movement of substances / transporter activity                                                                                                                                                                             | -    | -       | -1,7 | -3,5694  |
| FBgn0031316 | I41643_at             | CG5105  | Plap       | phospholipase A2 activator activity                                                                                                                                                                                                                                 | -1,8 | -3,3179 | -    | -        |
| FBgn0031433 | I45648_at             | CG18559 | Cyp309a2   | electron transporter activity / electron transporter activity / oxidoreductase activity / oxidoreductase activity                                                                                                                                                   | -    | -       | -1,6 | -3,4294  |
| FBgn0031464 | I45670_at             | CG3131  | -          | peroxidase activity / superoxide-generating NADPH oxidase activity                                                                                                                                                                                                  | -    | -       | -1,6 | -2,9805  |
| FBgn0031538 | I42390_at             | CG3246  | -          | -                                                                                                                                                                                                                                                                   | -    | -       | -1,8 | -4,8739  |
| FBgn0031645 | I51989_at             | CG3036  | -          | sodium:phosphate symporter activity                                                                                                                                                                                                                                 | -1,7 | -3,2152 | -    | -        |
| FBgn0031653 | I45795_at             | CG8871  | Jon25Biii  | elastase activity / serine-type peptidase activity                                                                                                                                                                                                                  | -    | -       | -2,9 | -7,6679  |
| FBgn0031706 | I45823_at             | CG6634  | nmr2       | transcription factor activity                                                                                                                                                                                                                                       | -    | -       | -1,6 | -3,6882  |
| FBgn0031832 | I45910_at             | CG9596  | -          | nucleic acid binding / translation factor activity, nucleic acid binding / translation initiation factor activity                                                                                                                                                   | -1,6 | -2,8177 | -    | -        |
| FBgn0031897 | I52508_at             | CG13784 | -          | -                                                                                                                                                                                                                                                                   | -1,8 | -3,3082 | -    | -        |
| FBgn0031907 | I54061_at             | CG5171  | -          | -                                                                                                                                                                                                                                                                   | -    | -       | -1,9 | -5,6136  |
| FBgn0031936 | I45974_at             | CG13794 | -          | -                                                                                                                                                                                                                                                                   | -6,8 | -9,5923 | -5,6 | -5,1974  |
| FBgn0032036 | I41633_at             | CG13384 | -          | -                                                                                                                                                                                                                                                                   | -1,7 | -3,1069 | -    | -        |
| FBgn0032167 | I41658_at             | CG5853  | -          | anion channel activity / ATPase activity, coupled to transmembrane movement of substances / transporter activity                                                                                                                                                    | -    | -       | -2,0 | -3,7223  |
| FBgn0032284 | I46183_at             | CG7294  | -          | -                                                                                                                                                                                                                                                                   | -    | -       | -2,0 | -3,788   |
| FBgn0032287 | I51967_at             | CG6415  | -          | -                                                                                                                                                                                                                                                                   | -    | -       | -1,9 | -3,2575  |
| FBgn0032297 | I46190_at             | CG17124 | -          | protein phosphatase inhibitor activity                                                                                                                                                                                                                              | -    | -       | -1,6 | -2,8138  |
| FBgn0032463 | I46305_at             | CG3762  | Vha68-2    | hydrogen-exporting ATPase activity, phosphorylative mechanism                                                                                                                                                                                                       | -    | -       | -1,5 | -3,0764  |
| FBgn0032726 | I46461_at             | CG10621 | -          | -                                                                                                                                                                                                                                                                   | -    | -       | -1,7 | -4,5161  |
| FBgn0032841 | I53191_at             | CG10728 | -          | -                                                                                                                                                                                                                                                                   | -1,7 | -3,0963 | -    | -        |
| FBgn0032844 | I46532_at             | CG10746 | fok        | -                                                                                                                                                                                                                                                                   | -    | -       | -1,8 | -4,6414  |
| FBgn0032885 | I46551_at             | CG9326  | -          | guanylate kinase activity                                                                                                                                                                                                                                           | -    | -       | -2,2 | -3,6379  |
| FBgn0033092 | I46687_at             | CG9422  | -          | -                                                                                                                                                                                                                                                                   | -    | -       | -1,5 | -3,3972  |
| FBgn0033205 | I41701_at             | CG2064  | -          | oxidoreductase activity                                                                                                                                                                                                                                             | -    | -       | -1,9 | -4,8135  |
| FBgn0033275 | I46794_at             | CG14756 | -          | -                                                                                                                                                                                                                                                                   | -    | -       | -1,9 | -19,7947 |
| FBgn0033367 | I42220_at             | CG8193  | -          | monophenol monooxygenase activity                                                                                                                                                                                                                                   | -2,5 | -5,4302 | -2,1 | -11,9779 |
| FBgn0033446 | I52817_at             | CG1648  | -          | -                                                                                                                                                                                                                                                                   | -3,3 | -7,1795 | -6,5 | -        |
| FBgn0033458 | I46908_at             | CG18446 | -          | -                                                                                                                                                                                                                                                                   | -    | -       | -1,7 | -3,8193  |
| FBgn0033529 | I53040_at             | CG17765 | -          | calcium ion binding / calmodulin binding                                                                                                                                                                                                                            | -1,7 | -3,1467 | -    | -        |
| FBgn0033575 | I46977_at             | CG33473 | luna       | -                                                                                                                                                                                                                                                                   | -    | -       | -1,9 | -5,4071  |
| FBgn0033604 | I47002_at             | CG9070  | -          | -                                                                                                                                                                                                                                                                   | -3,2 | -3,7504 | -1,9 | -2,955   |
| FBgn0033613 | I47009_at             | CG13211 | -          | -                                                                                                                                                                                                                                                                   | -    | -       | -2,1 | -5,064   |
| FBgn0033624 | I52681_at             | CG12384 | -          | enzyme activator activity / enzyme regulator activity                                                                                                                                                                                                               | -    | -       | -2,1 | -3,6262  |
| FBgn0033634 | I47022_at             | CG7763  | -          | -                                                                                                                                                                                                                                                                   | -    | -       | -1,6 | -3,3684  |
| FBgn0033643 | I47029_s_at           | CG30035 | -          | fructose transporter activity / glucose transporter activity / glucose transporter activity                                                                                                                                                                         | -1,6 | -3,0467 | -1,9 | -4,0521  |
| FBgn0033721 | I47084_at             | CG13159 | -          | -                                                                                                                                                                                                                                                                   | -2,0 | -4,2071 | -1,9 | -3,491   |
| FBgn0033779 | I42416_at             | CG3814  | -          | -                                                                                                                                                                                                                                                                   | -    | -       | -4,2 | -10,1433 |
| FBgn0033913 | I51760_at / I43046_at | CG8468  | -          | N-methyl-D-aspartate selective glutamate receptor activity                                                                                                                                                                                                          | -    | -       | -2,1 | -4,1871  |
| FBgn0034117 | I53785_at             | CG7997  | -          | monocarboxylate porter activity                                                                                                                                                                                                                                     | -    | -       | -1,7 | -3,3537  |
| FBgn0034212 | I42742_at             | CG30101 | -          | -                                                                                                                                                                                                                                                                   | -    | -       | -1,7 | -3,7933  |
| FBgn0034222 | I47364_at             | CG14478 | -          | -                                                                                                                                                                                                                                                                   | -    | -       | -1,5 | -3,2239  |
| FBgn0034294 | I47409_at             | CG5765  | -          | -                                                                                                                                                                                                                                                                   | -    | -       | -    | -        |
| FBgn0034395 | I55162_at             | CG15081 | I(2)03709  | -                                                                                                                                                                                                                                                                   | -    | -       | -2,5 | -4,1101  |
| FBgn0034404 | I42196_at             | CG15101 | Jheh1      | -                                                                                                                                                                                                                                                                   | -    | -       | -1,5 | -2,9233  |
| FBgn0034438 | I47493_at             | CG9416  | -          | -                                                                                                                                                                                                                                                                   | -    | -       | -2,4 | -4,7715  |
| FBgn0034468 | I47514_at             | CG11797 | Obp56a     | -                                                                                                                                                                                                                                                                   | -    | -       | -2,2 | -4,8095  |
| FBgn0034501 | I41541_at             | CG13868 | -          | -                                                                                                                                                                                                                                                                   | -1,6 | -3,0652 | -3,3 | -9,9265  |
| FBgn0034611 | I47615_at             | CG10069 | -          | glycerol-3-phosphate transporter activity                                                                                                                                                                                                                           | -1,7 | -4,132  | -    | -        |
| FBgn0034613 | I51929_at             | CG30390 | -          | -                                                                                                                                                                                                                                                                   | -    | -       | -1,9 | -2,8624  |
| FBgn0034698 | I41793_at             | CG6698  | Ntr        | -                                                                                                                                                                                                                                                                   | -    | -       | -2,5 | -4,1793  |
| FBgn0034702 | I52831_at             | CG6741  | a          | -                                                                                                                                                                                                                                                                   | -    | -       | -1,6 | -3,7544  |
| FBgn0034764 | I47701_at             | CG9952  | ppa        | -                                                                                                                                                                                                                                                                   | -    | -       | -    | -        |
| FBgn0034798 | I41705_at             | CG3820  | Nup214     | transporter activity                                                                                                                                                                                                                                                | -2,5 | -3,6951 | -    | -        |
| FBgn0035083 | I42434_at             | CG2803  | Tina-1     | structural constituent of muscle                                                                                                                                                                                                                                    | -2,0 | -3,3053 | -    | -        |
| FBgn0035091 | I52752_at             | CG3829  | -          | scavenger receptor activity                                                                                                                                                                                                                                         | -    | -       | -1,5 | -3,6401  |
| FBgn0035147 | I54410_at             | CG12030 | -          | UDP-glucose 4-epimerase activity                                                                                                                                                                                                                                    | -    | -       | -1,6 | -4,2392  |
| FBgn0035181 | I53685_at             | CG9205  | -          | -                                                                                                                                                                                                                                                                   | -1,7 | -3,0865 | -1,7 | -2,9555  |





|             |                           |         |         |                                                                                      |      |        |      |        |
|-------------|---------------------------|---------|---------|--------------------------------------------------------------------------------------|------|--------|------|--------|
| FBgn0034514 | 147549_at                 | CG13427 | -       | -                                                                                    | 2,1  | 5,0101 | 3,3  | 8,7284 |
| FBgn0034985 | 152943_at                 | CG3328  | -       | -                                                                                    | 4,3  | 4,9237 | -    | -      |
| FBgn0035089 | 147903_at                 | CG9358  | Phk-3   | -                                                                                    | 3,0  | 4,0764 | -    | -      |
| FBgn0035131 | 147924_at                 | CG17084 | mthl9   | G-protein coupled receptor activity                                                  | -    | -      | 2,7  | 3,244  |
| FBgn0035189 | 152102_at                 | CG9119  | -       | -                                                                                    | 2,0  | 4,3679 | -    | -      |
| FBgn0035208 | 147969_at                 | CG9184  | -       | -                                                                                    | 2,7  | 7,0256 | 1,5  | 3,8775 |
| FBgn0035621 | 154354_at                 | CG10591 | -       | -                                                                                    | 2,9  | 9,3854 | 2,2  | 6,3627 |
| FBgn0035735 | 148301_at                 | CG8640  | -       | structural constituent of cuticle (sensu Insecta)                                    | 4,1  | 7,0762 | -    | -      |
| FBgn0035880 | 152139_at                 | CG17352 | -       | -                                                                                    | 1,9  | 5,5497 | -    | -      |
| FBgn0035881 | 151795_at                 | CG7176  | Idh     | -                                                                                    | 1,8  | 4,5525 | 2,1  | 5,4674 |
| FBgn0035961 | 153070_at                 | CG4821  | Tequila | pancreatic elastase activity / serine-type endopeptidase activity / trypsin activity | 2,0  | 2,9974 | 2,3  | 6,5119 |
| FBgn0036352 | 148705_at                 | CG14110 | -       | -                                                                                    | 4,8  | 6,8724 | 3,2  | 8,3513 |
| FBgn0036786 | 148994_at                 | CG13701 | skl     | -                                                                                    | 2,1  | 3,6058 | 1,7  | 5,7467 |
| FBgn0036898 | 151832_at                 | CG8782  | Oat     | ornithine-oxo-acid transaminase activity                                             | -    | -      | 1,8  | 2,8988 |
| FBgn0037083 | 141375_at                 | CG5656  | -       | alkaline phosphatase activity / nucleotide phosphatase activity                      | 2,2  | 3,6549 | 2,3  | 5,0533 |
| FBgn0037356 | 152793_at                 | CG12170 | -       | 3-oxoacyl-[acyl-carrier protein] synthase activity                                   | -    | -      | 1,9  | 3,1459 |
| FBgn0037447 | 154993_at                 | CG2330  | -       | extracellular matrix structural constituent / structural molecule activity           | -    | -      | 1,6  | 2,9441 |
| FBgn0037913 | 151826_at                 | CG6783  | -       | carrier activity / fatty acid binding / tricarboxylate carrier activity              | 1,8  | 3,0129 | 2,1  | 4,7814 |
| FBgn0038366 | 149976_at                 | CG4576  | -       | -                                                                                    | -    | -      | 2,0  | 3,1122 |
| FBgn0038610 | 153033_at                 | CG7675  | -       | oxidoreductase activity, acting on CH-OH group of donors                             | 2,7  | 4,0305 | 2,1  | 5,3415 |
| FBgn0038681 | 150181_at                 | CG6042  | Cyp12a4 | electron transporter activity / oxidoreductase activity                              | 2,1  | 4,3231 | 5,8  | 7,4163 |
| FBgn0038733 | 152819_at                 | CG11407 | -       | ligase activity / long-chain fatty acid transporter activity                         | 14,3 | 5,6995 | 6,1  | 5,8678 |
| FBgn0038837 | 150283_at                 | CG3822  | -       | kainate selective glutamate receptor activity / ligand-gated ion channel activity    | 1,6  | 3,5237 | -    | -      |
| FBgn0039434 | 150663_r_at / 150662_i_at | CG5468  | -       | -                                                                                    | 2,2  | 4,6921 | -    | -      |
| FBgn0039436 | 150665_s_at               | CG6478  | -       | -                                                                                    | 3,2  | 5,9211 | -    | -      |
| FBgn0039437 | 154960_at                 | CG6447  | -       | -                                                                                    | 1,8  | 3,1365 | -    | -      |
| FBgn0039441 | 150670_i_at / 150671_f_at | CG5476  | -       | -                                                                                    | 2,5  | 5,8994 | -    | -      |
| FBgn0039444 | 150674_at                 | CG14243 | -       | -                                                                                    | 2,1  | 2,8382 | -    | -      |
| FBgn0039593 | 150780_at                 | CG9989  | -       | -                                                                                    | -    | -      | 2,9  | 3,5719 |
| FBgn0039690 | 154922_at                 | CG1969  | -       | -                                                                                    | 2,1  | 2,7931 | 2,3  | 5,4819 |
| FBgn0039795 | 141338_at                 | CG1342  | -       | serine-type endopeptidase inhibitor activity                                         | -    | -      | 3,9  | 7,5769 |
| FBgn0040626 | 151112_s_at               | CG15552 | Sox100B | -                                                                                    | 2,7  | 3,8143 | 4,1  | 3,2292 |
| FBgn0040718 | 151195_i_at / 151196_r_at | CG15353 | -       | -                                                                                    | 2,2  | 4,1762 | 1,7  | 9,9436 |
| FBgn0040741 | 151217_at                 | CG14486 | Uhg1    | -                                                                                    | 17,1 | 7,5556 | 15,1 | 5,784  |
| FBgn0040796 | 151266_at                 | CG13064 | -       | -                                                                                    | 2,2  | 3,6139 | 2,2  | 4,5389 |
| FBgn0040843 | 151316_at                 | CG15213 | -       | -                                                                                    | 2,1  | 4,3219 | -    | -      |

## Down-regulated genes:

| FB code     | Affy identifier           | CG numbers | Synonyms   | Description / Molecular function                                                                                                                                                            | Fold change st11 | t-value st11 | Fold change st12 | t-value st12 |
|-------------|---------------------------|------------|------------|---------------------------------------------------------------------------------------------------------------------------------------------------------------------------------------------|------------------|--------------|------------------|--------------|
| FBgn0000165 | 151955_at                 | CG5779     | Bc         | -                                                                                                                                                                                           | -                | -            | -3,4             | -4,4063      |
| FBgn0000216 | 143088_at                 | CG3096     | Brd        | calmodulin inhibitor activity                                                                                                                                                               | -                | -            | -2,3             | -4,2044      |
| FBgn0000299 | 153378_at                 | CG4145     | Cg25C      | extracellular matrix structural constituent / structural molecule activity                                                                                                                  | -                | -            | -2,6             | -6,3557      |
| FBgn0000337 | 143103_at                 | CG1555     | cn         | -                                                                                                                                                                                           | -2,1             | -4,4138      | -                | -            |
| FBgn0000439 | 143122_at                 | CG2189     | Dfd        | RNA polymerase II transcription factor activity / transcription factor activity                                                                                                             | -1,6             | -3,7375      | -                | -            |
| FBgn0000719 | 141493_at                 | CG9559     | fog        | -                                                                                                                                                                                           | -1,7             | -3,0244      | -                | -            |
| FBgn0001224 | 153583_at                 | CG4463     | Hsp23      | actin binding                                                                                                                                                                               | -2,6             | -4,1392      | -                | -            |
| FBgn0001235 | 143199_at                 | CG17117    | hth        | specific RNA polymerase II transcription factor activity / transcription factor activity                                                                                                    | -1,9             | -5,1637      | -1,5             | -3,1856      |
| FBgn0002561 | 143237_at                 | CG3839     | l(1)sc     | specific RNA polymerase II transcription factor activity / transcription factor activity                                                                                                    | -1,6             | -3,6828      | -                | -            |
| FBgn0002578 | 143245_at                 | CG8342     | m1         | serine-type endopeptidase inhibitor activity                                                                                                                                                | -3,3             | -4,5634      | -3,8             | -7,8666      |
| FBgn0002849 | 153515_at                 | CG1897     | Dr         | -                                                                                                                                                                                           | -1,5             | -3,8132      | -                | -            |
| FBgn0002868 | 143276_at                 | CG9470     | MtnA       | metal ion binding                                                                                                                                                                           | -                | -            | -1,6             | -3,6373      |
| FBgn0003057 | 143296_at                 | CG10598    | -          | -                                                                                                                                                                                           | -                | -            | -2,5             | -4,0513      |
| FBgn0003067 | 143299_at                 | CG17725    | Pepck      | phosphoenolpyruvate carboxylase (GTP) activity                                                                                                                                              | -                | -            | -1,9             | -5,0216      |
| FBgn0003082 | 143303_at                 | CG11205    | phr        | nucleic acid binding / nucleic acid binding                                                                                                                                                 | -1,8             | -2,9564      | -                | -            |
| FBgn0003089 | 143305_at                 | CG9614     | pip        | heparin-sulfate 2-sulfotransferase activity / sulfotransferase activity                                                                                                                     | -                | -            | -1,9             | -2,9694      |
| FBgn0003356 | 143338_f_at               | CG11034    | Jon99Cii   | chymotrypsin activity / chymotrypsin activity / serine-type endopeptidase activity / serine-type endopeptidase activity / serine-type peptidase activity / serine-type peptidase activity   | -                | -            | -2,8             | -13,9133     |
| FBgn0003357 | 143340_f_at / 143339_i_at | CG11362    | Jon99Ciii  | chymotrypsin activity / chymotrypsin activity / serine-type endopeptidase activity / serine-type endopeptidase activity / serine-type peptidase activity / serine-type peptidase activity   | -1,6             | -2,9701      | -20,3            | -13,5605     |
| FBgn0003410 | 153438_at                 | CG9949     | sina       | ligase activity / protein binding                                                                                                                                                           | -1,7             | -3,3617      | -                | -            |
| FBgn0003411 | 143353_at                 | CG1641     | sisA       | protein heterodimerization activity / transcription factor activity                                                                                                                         | -1,8             | -3,7862      | -2,9             | -5,304       |
| FBgn0003862 | 143384_at                 | CG8651     | trx        | contributes to histone lysine N-methyltransferase activity (H3-K4 specific) / DNA binding / histone lysine N-methyltransferase activity (H3-K4 specific) / transcription regulator activity | -1,8             | -4,5967      | -1,7             | -4,2731      |
| FBgn0004237 | 152021_at                 | CG12749    | Hrb87F     | RNA binding                                                                                                                                                                                 | -1,7             | -3,769       | -1,8             | -2,8324      |
| FBgn0004394 | 143457_at                 | CG12287    | pdm2       | DNA binding / specific RNA polymerase II transcription factor activity                                                                                                                      | -1,8             | -3,8832      | -                | -            |
| FBgn0004425 | 143464_f_at               | CG11189    | LysB       | chitinase activity / lysozyme activity                                                                      | -1,9             | -4,8029      | -1,5             | -3,1279      |
| FBgn0004427 | 143466_f_at               | CG9118     | LysD       | chitinase activity / lysozyme activity                                                                      | -2,7             | -4,1387      | -1,7             | -5,0413      |
| FBgn0004428 | 143467_f_at               | CG1180     | LysE       | chitinase activity / lysozyme activity                                                                      | -3,3             | -4,9848      | -                | -            |
| FBgn0004606 | 141676_at                 | CG1322     | zfh1       | DNA binding / RNA polymerase II transcription factor activity                                                                                                                               | -2,0             | -3,1383      | -1,9             | -3,2193      |
| FBgn0010105 | 143583_at                 | CG17943    | comm       | protein binding                                                                                                                                                                             | -                | -            | -1,6             | -3,0223      |
| FBgn0010359 | 143603_i_at               | CG30028    | gammaTry   | NOT serine-type endopeptidase activity / trypsin activity / trypsin activity                                                                                                                | -                | -            | -5,5             | -3,2476      |
| FBgn0010387 | 143608_at                 | CG8627     | Dbi        | acyl-CoA binding / carrier activity / diazepam binding / enzyme inhibitor activity                                                                                                          | -                | -            | -2,6             | -3,4967      |
| FBgn0010425 | 143624_at                 | CG18681    | epsilonTry | trypsin activity                                                                                                                                                                            | -                | -            | -2,3             | -3,9854      |
| FBgn0011202 | 143636_at                 | CG1768     | dia        | actin binding / structural constituent of cytoskeleton                                                                                                                                      | -2,8             | -3,276       | -2,2             | -3,1325      |
| FBgn0011704 | 142872_at                 | CG8975     | Rnr5       | ribonucleoside-diphosphate reductase activity                                                                                                                                               | -                | -            | -1,5             | -2,7863      |
| FBgn0011828 | 152747_at                 | CG12002    | Pxn        | peroxidase activity                                                                                                                                                                         | -                | -            | -2,5             | -2,8741      |
| FBgn0014141 | 141641_at                 | CG3937     | cher       | actin binding / structural constituent of cytoskeleton                                                                                                                                      | -3,4             | -7,7367      | -                | -            |
| FBgn0014151 | 143753_at                 | CG5403     | retn       | DNA binding / transcription factor activity / transcriptional activator activity / transcriptional repressor activity                                                                       | -1,6             | -3,3945      | -                | -            |
| FBgn0014343 | 143756_at                 | CG10601    | mirr       | protein binding / transcription factor activity / transcriptional activator activity                                                                                                        | -2,0             | -2,9534      | -                | -            |
| FBgn0015321 | 154399_at                 | CG8284     | UbcD4      | ligase activity / ubiquitin conjugating enzyme activity                                                                                                                                     | -1,5             | -3,3015      | -                | -            |
| FBgn0015550 | 143817_at                 | CG7659     | tap        | specific RNA polymerase II transcription factor activity                                                                                                                                    | -1,7             | -3,0738      | -                | -            |
| FBgn0016075 | 143868_at                 | CG16858    | vkq        | extracellular matrix structural constituent                                                                                                                                                 | -                | -            | -3,5             | -4,3661      |
| FBgn0020389 | 154327_at                 | CG8363     | Paps       | nucleotide kinase activity                                                                                                                                                                  | -2,0             | -3,3177      | -3,8             | -7,1892      |
| FBgn0024988 | 141607_at                 | CG14801    | -          | exonuclease activity / exonuclease activity / nucleic acid binding                                                                                                                          | -3,3             | -4,3927      | -                | -            |
| FBgn0027594 | 151918_s_at               | CG2086     | drpr       | extracellular matrix structural constituent / receptor activity                                                                                                                             | -1,6             | -4,3668      | -                | -            |
| FBgn0028491 | 151495_at                 | CG2930     | -          | proton-dependent oligopeptide transporter activity                                                                                                                                          | -2,8             | -6,021       | -                | -            |
| FBgn0028905 | 144302_at                 | CG32972    | -          | -                                                                                                                                                                                           | -2,6             | -6,8388      | -2,5             | -7,0078      |
| FBgn0029531 | 144348_at                 | CG13362    | -          | -                                                                                                                                                                                           | -                | -            | -2,1             | -4,0554      |
| FBgn0029804 | 144549_at                 | CG3097     | -          | carboxypeptidase A activity                                                                                                                                                                 | -1,7             | -3,2955      | -                | -            |
| FBgn0029918 | 151557_i_at               | CG33692    | -          | -                                                                                                                                                                                           | -2,3             | -2,944       | -                | -            |
| FBgn0030040 | 144700_at                 | CG15347    | -          | -                                                                                                                                                                                           | -                | -            | -3,2             | -4,4889      |
| FBgn0031653 | 145795_at                 | CG8871     | Jon25Biii  | elastase activity / serine-type peptidase activity                                                                                                                                          | -                | -            | -3,0             | -6,9789      |
| FBgn0031839 | 145915_at                 | CG31634    | Oatp26F    | organic anion transporter activity                                                                                                                                                          | -                | -            | -1,7             | -4,0354      |
| FBgn0031936 | 145974_at                 | CG13794    | -          | -                                                                                                                                                                                           | -6,1             | -7,0403      | -                | -            |
| FBgn0031937 | 145975_at                 | CG13795    | -          | amino acid transporter activity / transporter activity                                                                                                                                      | -2,3             | -3,3437      | -2,3             | -3,9004      |
| FBgn0032036 | 141633_at                 | CG13384    | -          | -                                                                                                                                                                                           | -1,9             | -2,9209      | -                | -            |
| FBgn0032082 | 146056_at                 | CG18088    | -          | -                                                                                                                                                                                           | -                | -            | -2,4             | -4,1127      |
| FBgn0032167 | 141658_at                 | CG5853     | -          | anion channel activity / ATPase activity, coupled to transmembrane movement of substances / transporter activity                                                                            | -                | -            | -2,7             | -4,0902      |
| FBgn0032192 | 146129_at                 | CG5731     | -          | -                                                                                                                                                                                           | -                | -            | -3,0             | -3,8023      |
| FBgn0032263 | 141619_at                 | CG7400     | Fatp       | long-chain fatty acid transporter activity                                                                                                                                                  | -1,5             | -3,4487      | -                | -            |
| FBgn0032282 | 146181_at                 | CG7299     | -          | -                                                                                                                                                                                           | -                | -            | -2,1             | -3,5675      |
| FBgn0032295 | 155152_at                 | CG12299    | -          | transcription regulator activity                                                                                                                                                            | -1,5             | -3,4525      | -                | -            |
| FBgn0032726 | 146461_at                 | CG10621    | -          | -                                                                                                                                                                                           | -1,6             | -3,342       | -1,9             | -3,4576      |
| FBgn0032803 | 146500_at                 | CG13082    | -          | -                                                                                                                                                                                           | -                | -            | -2,0             | -3,7589      |
| FBgn0032844 | 146532_at                 | CG10746    | fok        | -                                                                                                                                                                                           | -1,9             | -3,6136      | -2,0             | -4,4548      |
| FBgn0032899 | 152155_at                 | CG9338     | -          | -                                                                                                                                                                                           | -                | -            | -3,1             | -4,0211      |
| FBgn0032904 | 141458_at                 | CG9342     | -          | carrier activity / triglyceride binding                                                                                                                                                     | -                | -            | -2,3             | -3,0143      |
| FBgn0033035 | 146652_at                 | CG17337    | -          | -                                                                                                                                                                                           | -2,0             | -4,5311      | -1,7             | -3,3994      |
| FBgn0033068 | 146674_at                 | CG11212    | Ptr        | receptor activity                                                                                                                                                                           | -1,5             | -2,8605      | -                | -            |
| FBgn0033144 | 141404_at                 | CG12172    | Spn43Aa    | serine-type endopeptidase inhibitor activity                                                                                                                                                | -1,7             | -3,6977      | -1,7             | -3,7247      |
| FBgn0033205 | 141701_at                 | CG2064     | -          | oxidoreductase activity                                                                                                                                                                     | -                | -            | -1,7             | -3,0845      |
| FBgn0033275 | 146794_at                 | CG14756    | -          | -                                                                                                                                                                                           | -4,4             | -5,0137      | -60,2            | -17,2133     |
| FBgn0033367 | 142220_at                 | CG8193     | -          | monophenol monooxygenase activity                                                                                                                                                           | -2,1             | -4,7884      | -5,0             | -8,0326      |

|             |             |         |             |                                                                                                                                                             |       |         |       |          |
|-------------|-------------|---------|-------------|-------------------------------------------------------------------------------------------------------------------------------------------------------------|-------|---------|-------|----------|
| FBgn0033604 | 147002_at   | CG9070  | -           | -                                                                                                                                                           | -     | -       | -2,5  | -4,642   |
| FBgn0033613 | 147009_at   | CG13211 | -           | -                                                                                                                                                           | -     | -       | -1,9  | -3,1809  |
| FBgn0033634 | 147022_at   | CG7763  | -           | -                                                                                                                                                           | -2,0  | -6,3539 | -2,2  | -5,465   |
| FBgn0033643 | 147029_s_at | CG30035 | -           | fructose transporter activity / glucose transporter activity / glucose transporter activity                                                                 | -2,1  | -3,5807 | -     | -        |
| FBgn0033721 | 147084_at   | CG13159 | -           | -                                                                                                                                                           | -31,6 | -8,6854 | -67,1 | -18,7729 |
| FBgn0033724 | 153425_at   | CG8501  | -           | -                                                                                                                                                           | -     | -       | -2,2  | -3,3993  |
| FBgn0033855 | 153848_at   | CG13333 | -           | -                                                                                                                                                           | -     | -       | -1,8  | -3,5898  |
| FBgn0033921 | 147193_at   | CG8589  | -           | -                                                                                                                                                           | -1,9  | -3,1082 | -     | -        |
| FBgn0034079 | 154150_at   | CG8430  | Got1        | -                                                                                                                                                           | -1,6  | -3,2624 | -     | -        |
| FBgn0034108 | 155081_at   | CG3767  | Jhl-26      | -                                                                                                                                                           | -     | -       | -8,1  | -8,85    |
| FBgn0034117 | 153785_at   | CG7997  | -           | -                                                                                                                                                           | -1,7  | -3,4281 | -     | -        |
| FBgn0034203 | 147357_at   | CG30457 | -           | -                                                                                                                                                           | -     | -       | -1,7  | -3,3861  |
| FBgn0034294 | 147409_at   | CG5765  | -           | -                                                                                                                                                           | -     | -       | -3,1  | -5,1884  |
| FBgn0034356 | 147444_at   | CG10924 | -           | -                                                                                                                                                           | -1,8  | -4,6992 | -     | -        |
| FBgn0034698 | 141793_at   | CG6698  | NtR         | -                                                                                                                                                           | -2,0  | -3,4155 | -3,2  | -3,701   |
| FBgn0034716 | 142132_at   | CG3380  | Oatp58Dc    | organic anion transporter activity / sodium-independent organic anion transporter activity                                                                  | -1,8  | -3,4856 | -2,5  | -3,2791  |
| FBgn0035190 | 147960_at   | CG13913 | -           | -                                                                                                                                                           | -4,5  | -9,0967 | -1,8  | -3,0885  |
| FBgn0035551 | 148182_at   | CG7465  | -           | -                                                                                                                                                           | -     | -       | -6,4  | -6,0362  |
| FBgn0035717 | 152709_at   | CG10078 | Prat2       | -                                                                                                                                                           | -2,4  | -3,3659 | -1,6  | -3,3535  |
| FBgn0035763 | 154884_at   | CG8602  | -           | transporter activity                                                                                                                                        | -1,5  | -3,91   | -1,7  | -3,6002  |
| FBgn0035926 | 148422_at   | CG5804  | -           | acyl-CoA binding / carrier activity / diazepam binding / enzyme inhibitor activity                                                                          | -     | -       | -2,8  | -3,6054  |
| FBgn0035968 | 148450_at   | CG4484  | -           | sucrose:hydrogen symporter activity                                                                                                                         | -     | -       | -     | -        |
| FBgn0035999 | 148467_at   | CG3552  | -           | -                                                                                                                                                           | -1,7  | -3,4997 | -     | -        |
| FBgn0036182 | 153576_at   | CG6084  | -           | aldehyde reductase activity                                                                                                                                 | -     | -       | -2,0  | -3,5132  |
| FBgn0036381 | 148725_at   | CG8745  | -           | -                                                                                                                                                           | -     | -       | -1,8  | -2,9273  |
| FBgn0036494 | 153641_at   | CG7250  | Toll-6      | transmembrane receptor activity / transmembrane receptor protein serine/threonine kinase activity                                                           | -     | -       | -1,6  | -2,9305  |
| FBgn0036508 | 153226_at   | CG7439  | AGO2        | -                                                                                                                                                           | -1,5  | -3,6365 | -     | -        |
| FBgn0036600 | 148873_at   | CG13043 | -           | -                                                                                                                                                           | -1,7  | -3,7428 | -1,8  | -3,8357  |
| FBgn0036605 | 148878_s_at | CG13041 | -           | -                                                                                                                                                           | -     | -       | -5,3  | -6,1229  |
| FBgn0036675 | 149052_at   | CG9449  | -           | acid phosphatase activity                                                                                                                                   | -     | -       | -1,8  | -5,6174  |
| FBgn0036875 | 149052_at   | CG9449  | -           | acid phosphatase activity                                                                                                                                   | -1,7  | -3,3952 | -3,7  | -6,9339  |
| FBgn0037177 | 149244_at   | CG14454 | -           | molecular_function_unknown                                                                                                                                  | -1,5  | -3,3418 | -     | -        |
| FBgn0037372 | 151994_at   | CG2091  | -           | -                                                                                                                                                           | -1,8  | -3,9672 | -1,9  | -3,1675  |
| FBgn0037549 | 154657_at   | CG7878  | -           | ATP-dependent RNA helicase activity / helicase activity / nucleic acid binding                                                                              | -1,7  | -2,9874 | -     | -        |
| FBgn0037672 | 149545_at   | CG12952 | sage        | transcription factor activity                                                                                                                               | -     | -       | -1,5  | -3,1526  |
| FBgn0037930 | 142488_s_at | CG14715 | -           | FK506 binding / peptidyl-prolyl cis-trans isomerase activity / protein tyrosine phosphatase activity / receptor activity / transcription regulator activity | -1,5  | -4,1997 | -1,7  | -3,5648  |
| FBgn0038022 | 149757_at   | CG4381  | GstD3       | glutathione transferase activity                                                                                                                            | -     | -       | -1,9  | -3,0328  |
| FBgn0038024 | 149759_at   | CG12242 | GstD5       | glutathione transferase activity                                                                                                                            | -     | -       | -1,9  | -2,8856  |
| FBgn0038034 | 149768_s_at | CG17875 | Cyp9F3W     | electron transporter activity / nucleic acid binding / oxidoreductase activity                                                                              | -     | -       | -3,1  | -5,2613  |
| FBgn0038037 | 153031_at   | CG11466 | Cyp9F2      | electron transporter activity / nucleic acid binding / oxidoreductase activity                                                                              | -     | -       | -3,8  | -4,6099  |
| FBgn0038059 | 149782_at   | CG6489  | Hsp70Bc     | -                                                                                                                                                           | -     | -       | -2,7  | -6,2164  |
| FBgn0038077 | 142293_at   | CG12286 | kar         | monocarboxylic acid transporter activity                                                                                                                    | -     | -       | -2,2  | -2,8294  |
| FBgn0038081 | 142746_at   | CG10120 | Men         | carboxy-lyase activity / malate dehydrogenase (oxaloacetate-decarboxylating) (NADP+) activity                                                               | -     | -       | -1,9  | -3,8297  |
| FBgn0038194 | 152120_at   | CG3050  | Cyp6d5      | electron transporter activity / oxidoreductase activity                                                                                                     | -     | -       | -     | -        |
| FBgn0038278 | 142158_at   | CG7007  | VhaPPA1-1   | hydrogen-exporting ATPase activity, phosphorylative mechanism                                                                                               | -5,6  | -9,2367 | -9,1  | -10,5256 |
| FBgn0038353 | 149968_at   | CG5399  | -           | -                                                                                                                                                           | -     | -       | -1,5  | -3,1512  |
| FBgn0038563 | 152336_at   | CG7780  | DNasell     | -                                                                                                                                                           | -2,1  | -3,2389 | -     | -        |
| FBgn0038647 | 150161_at   | CG14302 | -           | -                                                                                                                                                           | -3,2  | -5,2414 | -3,4  | -5,1751  |
| FBgn0038803 | 152563_at   | CG5191  | -           | hydrolase activity                                                                                                                                          | -     | -       | -1,7  | -3,4976  |
| FBgn0038973 | 150369_at   | CG18594 | -           | kinase inhibitor activity / kinase regulator activity                                                                                                       | -     | -       | -1,6  | -2,8992  |
| FBgn0038982 | 142587_at   | CG33093 | -           | gibberellin 20-oxidase activity                                                                                                                             | -1,6  | -4,7419 | -2,2  | -5,1444  |
| FBgn0039052 | 150424_at   | CG6733  | -           | NOT aminoacylase activity                                                                                                                                   | -     | -       | -4,9  | -7,4501  |
| FBgn0039539 | 154473_at   | CG12880 | -           | -                                                                                                                                                           | -     | -       | -3,3  | -3,9831  |
| FBgn0039567 | 150762_at   | CG4869  | betaTub97EF | structural constituent of cytoskeleton / tubulin binding                                                                                                    | -     | -       | -1,7  | -2,7953  |
| FBgn0039586 | 142182_s_at | CG33103 | Ppn         | metalloproteinase activity / serine-type endopeptidase inhibitor activity                                                                                   | -2,3  | -6,9391 | -2,7  | -6,6612  |
| FBgn0039631 | 154649_at   | CG11305 | Sirt7       | chromatin binding / deacetylase activity / hydrolase activity / nucleic acid binding / transcription regulator activity                                     | -1,7  | -3,0478 | -     | -        |
| FBgn0039682 | 150834_at   | CG7584  | Obp99c      | -                                                                                                                                                           | -     | -       | -3,0  | -9,9305  |
| FBgn0039686 | 150838_at   | CG15506 | -           | -                                                                                                                                                           | -     | -       | -2,1  | -4,3952  |
| FBgn0039777 | 150893_f_at | CG2229  | Jon99Fii    | elastase activity / NOT serine-type endopeptidase activity / serine-type endopeptidase activity                                                             | -     | -       | -6,8  | -4,7892  |
| FBgn0039778 | 141369_at   | CG18030 | Jon99Fi     | elastase activity / NOT serine-type endopeptidase activity / serine-type endopeptidase activity                                                             | -     | -       | -8,0  | -7,3744  |
| FBgn0039779 | 150894_at   | CG1546  | PH4alpha5G2 | procollagen-proline 4-dioxygenase activity                                                                                                                  | -     | -       | -2,2  | -4,2621  |
| FBgn0039800 | 142413_at   | CG11314 | -           | -                                                                                                                                                           | -     | -       | -2,3  | -3,5627  |
| FBgn0039873 | 150955_at   | CG2191  | -           | cation transporter activity / sodium-dependent multivitamin transporter activity                                                                            | -3,4  | -5,0807 | -     | -        |
| FBgn0039922 | 153799_at   | CG1793  | MED26       | RNA polymerase II transcription mediator activity / transcription factor activity                                                                           | -1,5  | -3,2789 | -     | -        |
| FBgn0040813 | 151287_at   | CG11051 | Nplp2       | -                                                                                                                                                           | -1,5  | -3,9534 | -1,6  | -4,1908  |
| FBgn0040865 | 151339_at   | CG15758 | -           | -                                                                                                                                                           | -     | -       | -1,9  | -3,2336  |
| FBgn0040984 | 151444_at   | CG4440  | -           | -                                                                                                                                                           | -     | -       | -2,0  | -4,8177  |

Table S5. Genes responsive to Abd-A induction  
Up-regulated genes:

| FB code     | Affy identifier | CG numbers | Synonyms    | Description / Molecular function                                                                                                     | Fold change st11 | t-value st11 | Fold change st12 | t-value st12 |
|-------------|-----------------|------------|-------------|--------------------------------------------------------------------------------------------------------------------------------------|------------------|--------------|------------------|--------------|
| FBgn0000014 | 143052_at       | CG10325    | abd-A       | specific RNA polymerase II transcription factor activity                                                                             | 9,8              | 10,0511      | 7,1              | 16,6262      |
| FBgn0000139 | 154585_at       | CG6677     | ash2        | transcription regulator activity                                                                                                     | -                | -            | 1,5              | 4,3546       |
| FBgn0000158 | 143082_at       | CG10422    | bam         | -                                                                                                                                    | -                | -            | 1,7              | 3,236        |
| FBgn0000166 | 142838_at       | CG1034     | bcd         | morphogen activity / specific RNA polymerase II transcription factor activity / translation regulator activity                       | 1,5              | 3,7321       | 1,8              | 7,0277       |
| FBgn0000228 | 143090_at       | CG14025    | Bsq25D      | molecular_function_unknown                                                                                                           | -                | -            | 1,7              | 4,1048       |
| FBgn0000376 | 154489_at       | CG2714     | crm         | DNA binding                                                                                                                          | -                | -            | 1,5              | 3,4184       |
| FBgn0000499 | 143133_at       | CG18361    | dsh         | Notch binding                                                                                                                        | -                | -            | 1,5              | 3,6127       |
| FBgn0001078 | 154699_at       | CG4059     | ftz-f1      | DNA binding / ligand-dependent nuclear receptor activity / transcription cofactor activity / transcription factor activity           | -                | -            | 1,5              | 4,8828       |
| FBgn0001079 | 143170_at       | CG6551     | fu          | protein serine/threonine kinase activity / receptor signaling protein serine/threonine kinase activity                               | -                | -            | 1,6              | 3,5523       |
| FBgn0001086 | 155082_at       | CG4274     | fzy         | -                                                                                                                                    | -                | -            | 1,5              | 4,5201       |
| FBgn0001225 | 153731_at       | CG4183     | Hsp26       | -                                                                                                                                    | 2,0              | 5,4787       | -                | -            |
| FBgn0001974 | 143217_at       | CG3688     | I(2)35Bd    | nucleic acid binding                                                                                                                 | -                | -            | 1,6              | 4,6107       |
| FBgn0002570 | 143242_at       | CG8696     | LvpH        | alpha-glucosidase activity                                                                                                           | -                | -            | 3,1              | 7,9277       |
| FBgn0002673 | 153947_at       | CG4965     | twe         | protein tyrosine phosphatase activity / protein tyrosine/serine/threonine phosphatase activity                                       | -                | -            | 1,9              | 6,5679       |
| FBgn0002715 | 154633_at       | CG5303     | mei-5332    | molecular_function_unknown                                                                                                           | -                | -            | 1,5              | 3,7778       |
| FBgn0002775 | 143267_at       | CG8631     | msl-3       | chromatin binding / protein binding / RNA binding / transcription regulator activity                                                 | -                | -            | 2,0              | 2,8724       |
| FBgn0002872 | 155050_at       | CG1960     | mu2         | -                                                                                                                                    | -                | -            | 1,8              | 4,4071       |
| FBgn0002924 | 154464_at       | CG7831     | ncd         | microtubule motor activity / minus-end-directed microtubule motor activity / structural constituent of cytoskeleton                  | -                | -            | 1,6              | 6,6883       |
| FBgn0002962 | 151690_at       | CG5637     | nos         | protein binding / RNA binding                                                                                                        | 2,1              | 3,2736       | -                | -            |
| FBgn0003015 | 154312_at       | CG10901    | osk         | -                                                                                                                                    | 1,8              | 3,4338       | -                | -            |
| FBgn0003087 | 153890_at       | CG5052     | pim         | -                                                                                                                                    | -                | -            | 1,6              | 3,2952       |
| FBgn0003114 | 143307_at       | CG9183     | plu         | DNA binding                                                                                                                          | -                | -            | 1,7              | 5,5487       |
| FBgn0003138 | 141300_at       | CG9181     | Ptp61F      | protein tyrosine phosphatase activity / receptor activity                                                                            | -                | -            | 1,7              | 4,6624       |
| FBgn0003444 | 154678_at       | CG11561    | smo         | G-protein coupled receptor activity / hedgehog receptor activity / transmembrane receptor activity                                   | -                | -            | 1,5              | 6,6439       |
| FBgn0003655 | 151660_at       | CG3429     | swa         | dynein binding / RNA binding                                                                                                         | -                | -            | 1,7              | 4,1672       |
| FBgn0003701 | 141565_at       | CG5785     | thr         | -                                                                                                                                    | -                | -            | 1,7              | 5,2166       |
| FBgn0003733 | 143381_at       | CG1389     | tor         | protein kinase activity / protein-tyrosine kinase activity / transmembrane receptor protein tyrosine kinase activity                 | -                | -            | 1,9              | 6,6178       |
| FBgn0004106 | 154844_at       | CG5363     | cdc2        | protein binding / protein serine/threonine kinase activity / receptor signaling protein serine/threonine kinase activity             | -                | -            | 1,5              | 6,5855       |
| FBgn0004377 | 143451_at       | CG15844    | Klp54D      | microtubule motor activity / structural constituent of cytoskeleton                                                                  | -                | -            | 1,8              | 3,5021       |
| FBgn0004554 | 143480_at       | CG7539     | Edg91       | structural constituent of pupal cuticle (sensu Insecta)                                                                              | 2,2              | 4,0895       | -                | -            |
| FBgn0004598 | 154521_at       | CG18734    | Fur2        | furin activity                                                                                                                       | -                | -            | 1,8              | 4,1055       |
| FBgn0004611 | 153733_at       | CG4574     | Plc21C      | phosphoinositide phospholipase C activity                                                                                            | -                | -            | 1,5              | 3,7124       |
| FBgn0004655 | 142777_at       | CG3707     | wapl        | -                                                                                                                                    | -                | -            | 1,5              | 3,7589       |
| FBgn0004698 | 141256_at       | CG8153     | mus210      | damaged DNA binding                                                                                                                  | -                | -            | 1,5              | 5,0127       |
| FBgn0004924 | 143538_at       | CG6146     | Top1        | nucleic acid binding                                                                                                                 | -                | -            | 1,5              | 6,2242       |
| FBgn0005617 | 143556_at       | CG10385    | msl-1       | chromatin binding / DNA binding / protein binding                                                                                    | -                | -            | 1,5              | 3,5543       |
| FBgn0005694 | 151719_s_at     | CG5683     | Ae1F        | RNA polymerase II transcription factor activity / specific transcriptional repressor activity / transcription factor activity        | 1,6              | 3,7158       | 1,6              | 3,721        |
| FBgn0010315 | 154137_at       | CG9096     | CycD        | cyclin-dependent protein kinase regulator activity / kinase activator activity                                                       | -                | -            | 1,6              | 7,017        |
| FBgn0010441 | 142881_at       | CG5974     | pll         | protein kinase activity / protein serine/threonine kinase activity / transmembrane receptor protein serine/threonine kinase activity | -                | -            | 1,6              | 2,8446       |
| FBgn0010550 | 154412_at       | CG8068     | Su(var)2-10 | DEAD/H-box RNA helicase binding / DNA binding                                                                                        | -                | -            | 1,6              | 3,1018       |

|             |             |         |               |                                                                                                                                                                                                    |     |        |     |         |
|-------------|-------------|---------|---------------|----------------------------------------------------------------------------------------------------------------------------------------------------------------------------------------------------|-----|--------|-----|---------|
| FBgn0011705 | 154129_at   | CG9552  | rost          | -                                                                                                                                                                                                  | -   | -      | 1,6 | 3,1734  |
| FBgn0011737 | 142924_at   | CG4488  | wee           | non-membrane spanning protein tyrosine kinase activity / protein kinase activity / protein-tyrosine kinase activity                                                                                | -   | -      | 1,7 | 4,6435  |
| FBgn0011761 | 154221_at   | CG4193  | dhd           | thiol-disulfide exchange intermediate activity                                                                                                                                                     | 3,0 | 5,358  | -   | -       |
| FBgn0013746 | 141726_at   | CG9556  | alien         | protein binding / signal transducer activity / transcription corepressor activity                                                                                                                  | -   | -      | 1,5 | 4,8825  |
| FBgn0013953 | 142492_at   | CG7005  | Esp           | sulfate porter activity                                                                                                                                                                            | 1,5 | 4,51   | 2,1 | 10,5411 |
| FBgn0014032 | 151950_at   | CG12117 | Sptr          | sepiapterin reductase activity                                                                                                                                                                     | -   | -      | 1,9 | 6,279   |
| FBgn0014931 | 151670_at   | CG2678  | -             | transcription factor activity                                                                                                                                                                      | -   | -      | 1,9 | 5,9304  |
| FBgn0015037 | 143782_at   | CG10842 | Cyp4p1        | electron transporter activity / oxidoreductase activity                                                                                                                                            | 2,5 | 5,3164 | 3,6 | 6,122   |
| FBgn0015321 | 154399_at   | CG8284  | UbcD4         | ligase activity / ubiquitin conjugating enzyme activity                                                                                                                                            | 1,5 | 4,6147 | -   | -       |
| FBgn0015391 | 154348_at   | CG11397 | glu           | chromatin binding / DNA binding / nucleotide binding                                                                                                                                               | -   | -      | 1,6 | 7,212   |
| FBgn0015573 | 152410_at   | CG1089  | alpha-Est5    | carboxylesterase activity                                                                                                                                                                          | -   | -      | 1,6 | 3,683   |
| FBgn0015800 | 143846_at   | CG6920  | mus309        | ATP-dependent DNA helicase activity / ATP-dependent DNA helicase activity / DNA binding / DNA helicase activity / DNA-dependent protein kinase activity / helicase activity / nucleic acid binding | -   | -      | 1,7 | 3,3192  |
| FBgn0015926 | 153153_at   | CG6157  | dah           | -                                                                                                                                                                                                  | -   | -      | 1,6 | 7,5231  |
| FBgn0016034 | 153959_at   | CG11254 | mael          | -                                                                                                                                                                                                  | -   | -      | 1,7 | 7,2831  |
| FBgn0017448 | 143890_at   | CG2187  | -             | cation transporter activity / sodium:iodide symporter activity                                                                                                                                     | 1,7 | 3,4138 | -   | -       |
| FBgn0019637 | 154540_at   | CG1433  | Atu           | molecular_function unknown                                                                                                                                                                         | -   | -      | 1,9 | 4,3352  |
| FBgn0020018 | 154945_at   | CG5796  | Ppox          | protoporphyrinogen oxidase activity                                                                                                                                                                | -   | -      | 1,7 | 3,2891  |
| FBgn0020360 | 153671_at   | CG6219  | cav           | -                                                                                                                                                                                                  | -   | -      | 2,3 | 3,9551  |
| FBgn0020911 | 154217_at   | CG5595  | Sce           | protein binding                                                                                                                                                                                    | -   | -      | 1,6 | 4,2711  |
| FBgn0022772 | 153737_at   | CG10667 | Orc1          | DNA binding / DNA replication origin binding                                                                                                                                                       | -   | -      | 1,7 | 5,2674  |
| FBgn0022981 | 153614_at   | CG1058  | rpk           | amiloride-sensitive sodium channel activity / sodium channel activity                                                                                                                              | -   | -      | 1,9 | 5,5308  |
| FBgn0022987 | 143968_at   | CG4816  | qkr54B        | RNA binding                                                                                                                                                                                        | -   | -      | 1,8 | 5,0759  |
| FBgn0023129 | 154184_at   | CG3705  | aay           | phosphoserine phosphatase activity                                                                                                                                                                 | -   | -      | 1,5 | 3,077   |
| FBgn0023177 | 143976_at   | CG32505 | Pp4-19C       | protein serine/threonine phosphatase activity                                                                                                                                                      | -   | -      | 1,5 | 5,8096  |
| FBgn0023444 | 154250_at   | CG4063  | ebi           | GTP binding / protein binding                                                                                                                                                                      | -   | -      | 1,6 | 6,6333  |
| FBgn0023513 | 143991_at   | CG14803 | -             | -                                                                                                                                                                                                  | -   | -      | 1,7 | 5,7545  |
| FBgn0023522 | 154980_at   | CG11596 | -             | -                                                                                                                                                                                                  | -   | -      | 1,5 | 5,5335  |
| FBgn0024227 | 154863_at   | CG6620  | ial           | protein kinase activity / protein serine/threonine kinase activity / receptor signaling protein serine/threonine kinase activity                                                                   | -   | -      | 1,6 | 3,7524  |
| FBgn0024542 | 153420_at   | CG8614  | Neos          | RNA binding                                                                                                                                                                                        | -   | -      | 1,6 | 6,8124  |
| FBgn0024732 | 144023_at   | CG8357  | Rep1          | -                                                                                                                                                                                                  | -   | -      | 1,6 | 2,8396  |
| FBgn0025458 | 144064_at   | CG7838  | Bub1          | protein kinase activity / protein serine/threonine kinase activity / receptor signaling protein serine/threonine kinase activity                                                                   | -   | -      | 1,5 | 6,4085  |
| FBgn0025615 | 154672_at   | CG3024  | torp4a        | -                                                                                                                                                                                                  | -   | -      | 1,6 | 6,3412  |
| FBgn0025626 | 152343_at   | CG4281  | -             | -                                                                                                                                                                                                  | -   | -      | 1,5 | 3,9332  |
| FBgn0025635 | 144078_at   | CG17829 | -             | -                                                                                                                                                                                                  | -   | -      | 1,6 | 4,5283  |
| FBgn0025743 | 144091_at   | CG18582 | mbt           | protein serine/threonine kinase activity / receptor signaling protein serine/threonine kinase activity                                                                                             | -   | -      | 1,5 | 5,5244  |
| FBgn0025781 | 144093_at   | CG6759  | cdc16         | meprin A activity / ubiquitin-protein ligase activity                                                                                                                                              | -   | -      | 1,5 | 3,085   |
| FBgn0025874 | 153556_at   | CG8474  | Meics         | -                                                                                                                                                                                                  | -   | -      | 1,5 | 6,2103  |
| FBgn0026150 | 153980_at   | CG6291  | ApepP         | metallopeptidase activity                                                                                                                                                                          | -   | -      | 1,7 | 6,7532  |
| FBgn0026317 | 154199_at   | CG6147  | Tsc1          | kinase binding                                                                                                                                                                                     | -   | -      | 1,5 | 2,8225  |
| FBgn0026598 | 154309_at   | CG6193  | Apc2          | microtubule binding / protein binding / structural constituent of cytoskeleton                                                                                                                     | -   | -      | 1,9 | 5,1444  |
| FBgn0026616 | 153670_at   | CG4606  | alpha-Man-IIb | alpha-mannosidase activity / hydrolase activity, hydrolyzing N-glycosyl compounds / mannosyl-oligosaccharide 1,3-1,6-alpha-mannosidase activity                                                    | -   | -      | 1,6 | 5,0267  |
| FBgn0026629 | 153839_at   | CG6072  | sra           | receptor binding                                                                                                                                                                                   | -   | -      | 1,5 | 6,3994  |
| FBgn0026751 | 153571_at   | CG4208  | XRCC1         | nucleic acid binding                                                                                                                                                                               | -   | -      | 1,8 | 3,2126  |
| FBgn0026871 | 144162_at   | CG14781 | -             | -                                                                                                                                                                                                  | -   | -      | 1,8 | 7,6695  |
| FBgn0027052 | 144169_at   | CG5203  | CHIP          | ubiquitin-protein ligase activity                                                                                                                                                                  | -   | -      | 1,7 | 4,7111  |
| FBgn0027055 | 144170_at   | CG18332 | CSN3          | -                                                                                                                                                                                                  | -   | -      | 1,5 | 4,6261  |
| FBgn0027511 | 154082_at   | CG1619  | -             | -                                                                                                                                                                                                  | -   | -      | 1,6 | 3,291   |
| FBgn0027521 | 154041_at   | CG3679  | -             | -                                                                                                                                                                                                  | -   | -      | 2,0 | 3,5026  |
| FBgn0027526 | 154017_at   | CG6697  | -             | -                                                                                                                                                                                                  | -   | -      | 1,5 | 5,5686  |
| FBgn0027606 | 151864_at   | CG12787 | hoe1          | cation transporter activity / L-tyrosine transporter activity / transporter activity                                                                                                               | -   | -      | 1,8 | 6,0355  |
| FBgn0027617 | 151768_at   | CG5808  | -             | isomerase activity / mRNA 3'-UTR binding / mRNA binding / RNA binding / RNA binding                                                                                                                | -   | -      | 1,6 | 2,9189  |
| FBgn0027783 | 153548_at   | CG10212 | SMC2          | chromatin binding / DNA binding                                                                                                                                                                    | -   | -      | 1,6 | 3,7265  |
| FBgn0027889 | 153644_at   | CG6386  | ball          | histone-threonine kinase activity / protein kinase activity / protein serine/threonine kinase activity                                                                                             | -   | -      | 1,6 | 6,9668  |
| FBgn0027890 | 153626_at   | CG4584  | dUTPase       | -                                                                                                                                                                                                  | -   | -      | 1,5 | 6,9801  |
| FBgn0027914 | 153274_at   | CG10670 | Gen           | damaged DNA binding / endonuclease activity / exodeoxyribonuclease activity / flap endonuclease activity / single-stranded DNA specific endodeoxyribonuclease activity                             | -   | -      | 1,5 | 2,8563  |
| FBgn0027949 | 154597_at   | CG10364 | msb11         | molecular_function unknown                                                                                                                                                                         | -   | -      | 1,6 | 6,1297  |
| FBgn0028408 | 144208_at   | CG1975  | Rep2          | -                                                                                                                                                                                                  | -   | -      | 1,6 | 5,3912  |
| FBgn0028487 | 152215_at   | CG9611  | -             | receptor binding / structural molecule activity                                                                                                                                                    | -   | -      | 1,5 | 4,2904  |
| FBgn0028528 | 154408_at   | CG4482  | mol           | -                                                                                                                                                                                                  | -   | -      | 1,7 | 8,0834  |
| FBgn0028708 | 144250_at   | CG11993 | Mst85C        | -                                                                                                                                                                                                  | -   | -      | 1,7 | 6,2316  |
| FBgn0028860 | 144271_at   | CG15266 | -             | -                                                                                                                                                                                                  | -   | -      | 1,5 | 3,4807  |
| FBgn0028967 | 144335_at   | CG8947  | 26-29-p       | -                                                                                                                                                                                                  | 2,0 | 5,3428 | -   | -       |
| FBgn0029532 | 144349_at   | CG13361 | -             | -                                                                                                                                                                                                  | 2,6 | 3,9913 | -   | -       |
| FBgn0029546 | 154641_at   | CG3704  | -             | purine nucleotide binding                                                                                                                                                                          | -   | -      | 1,5 | 4,0666  |
| FBgn0029685 | 154104_at   | CG2938  | -             | -                                                                                                                                                                                                  | -   | -      | 1,8 | 6,2064  |
| FBgn0029744 | 141469_at   | CG11706 | -             | -                                                                                                                                                                                                  | 3,4 | 5,7748 | 7,0 | 7,593   |
| FBgn0029756 | 144516_at   | CG3309  | -             | -                                                                                                                                                                                                  | -   | -      | 2,0 | 3,9094  |
| FBgn0029824 | 154360_at   | CG3726  | -             | DNA binding / transcription regulator activity                                                                                                                                                     | -   | -      | 1,8 | 3,0521  |
| FBgn0029865 | 154623_at   | CG15893 | -             | -                                                                                                                                                                                                  | 1,5 | 3,1537 | 1,7 | 7,3329  |
| FBgn0029891 | 152822_at   | CG4523  | -             | protein kinase activity                                                                                                                                                                            | -   | -      | 1,6 | 6,636   |
| FBgn0029899 | 151584_r_at | CG14438 | -             | -                                                                                                                                                                                                  | -   | -      | 1,6 | 3,06    |
| FBgn0029924 | 154888_at   | CG4586  | -             | acyl-CoA oxidase activity                                                                                                                                                                          | -   | -      | 1,6 | 3,9972  |
| FBgn0029935 | 142921_at   | CG4615  | -             | -                                                                                                                                                                                                  | -   | -      | 1,5 | 3,6013  |
| FBgn0029970 | 153517_at   | CG17256 | Nek2          | protein serine/threonine kinase activity / receptor signaling protein serine/threonine kinase activity                                                                                             | -   | -      | 1,7 | 2,9171  |
| FBgn0029996 | 153913_at   | CG2257  | Ubc-E2H       | ligase activity / ubiquitin conjugating enzyme activity                                                                                                                                            | -   | -      | 1,5 | 4,2273  |
| FBgn0030003 | 153751_at   | CG2116  | -             | -                                                                                                                                                                                                  | -   | -      | 1,7 | 3,634   |
| FBgn0030048 | 153300_at   | CG12112 | -             | -                                                                                                                                                                                                  | -   | -      | 1,6 | 3,4637  |
| FBgn0030054 | 141513_at   | CG12109 | Caf1-180      | chromatin binding                                                                                                                                                                                  | -   | -      | 1,5 | 3,5348  |
| FBgn0030057 | 144710_at   | CG12108 | Ppt1          | palmitoyl-(protein) hydrolase activity                                                                                                                                                             | -   | -      | 1,5 | 3,1873  |
| FBgn0030100 | 151907_at   | CG12106 | -             | -                                                                                                                                                                                                  | -   | -      | 1,5 | 3,1054  |
| FBgn0030122 | 154992_at   | CG16892 | -             | -                                                                                                                                                                                                  | -   | -      | 1,6 | 6,6823  |
| FBgn0030147 | 144764_at   | CG32697 | I(1)G0232     | -                                                                                                                                                                                                  | -   | -      | 1,5 | 3,362   |
| FBgn0030228 | 144824_at   | CG1826  | -             | actin binding / structural constituent of cytoskeleton                                                                                                                                             | -   | -      | 1,5 | 5,429   |
| FBgn0030301 | 151708_s_at | CG1745  | -             | -                                                                                                                                                                                                  | -   | -      | 1,5 | 5,0475  |
| FBgn0030312 | 144884_at   | CG1558  | I(1)G0237     | -                                                                                                                                                                                                  | -   | -      | 1,5 | 2,8627  |
| FBgn0030336 | 154432_at   | CG1578  | -             | -                                                                                                                                                                                                  | -   | -      | 1,5 | 3,3576  |
| FBgn0030353 | 153926_at   | CG15737 | -             | polynucleotide adenyltransferase activity                                                                                                                                                          | -   | -      | 1,8 | 4,4908  |
| FBgn0030373 | 144920_at   | CG12721 | -             | -                                                                                                                                                                                                  | -   | -      | 2,0 | 4,3731  |
| FBgn0030430 | 151663_at   | CG32649 | -             | protein kinase activity                                                                                                                                                                            | -   | -      | 1,5 | 3,6409  |
| FBgn0030432 | 144970_at   | CG4404  | -             | -                                                                                                                                                                                                  | -   | -      | 1,9 | 4,2675  |
| FBgn0030501 | 145019_at   | CG11177 | BthD          | -                                                                                                                                                                                                  | -   | -      | 1,7 | 5,0459  |
| FBgn0030557 | 154460_at   | CG12047 | mud           | -                                                                                                                                                                                                  | -   | -      | 1,7 | 2,9859  |
| FBgn0030603 | 141531_at   | CG5541  | -             | -                                                                                                                                                                                                  | 1,5 | 2,8343 | -   | -       |
| FBgn0030607 | 154001_at   | CG5560  | -             | -                                                                                                                                                                                                  | -   | -      | 2,0 | 5,3752  |
| FBgn0030709 | 142914_at   | CG9126  | Stim          | carrier activity / nuclear export signal receptor activity / RAN protein binding                                                                                                                   | -   | -      | 1,5 | 4,1628  |
| FBgn0030710 | 153942_at   | CG8924  | -             | DNA binding / transcription regulator activity                                                                                                                                                     | -   | -      | 1,8 | 6,8247  |
| FBgn0030711 | 145163_at   | CG8928  | -             | -                                                                                                                                                                                                  | -   | -      | 1,5 | 4,0627  |
| FBgn0030803 | 153983_at   | CG4880  | -             | -                                                                                                                                                                                                  | -   | -      | 1,6 | 7,2147  |
| FBgn0030855 | 145251_at   | CG5800  | -             | nucleic acid binding / RNA helicase activity                                                                                                                                                       | -   | -      | 1,5 | 2,8934  |
| FBgn0030864 | 145258_at   | CG8173  | -             | protein serine/threonine kinase activity                                                                                                                                                           | -   | -      | 1,8 | 6,9568  |
| FBgn0030874 | 154845_at   | CG6506  | -             | -                                                                                                                                                                                                  | -   | -      | 1,8 | 3,2474  |
| FBgn0030890 | 154547_at   | CG7536  | -             | G-protein coupled receptor activity / receptor activity                                                                                                                                            | -   | -      | 1,6 | 4,2536  |
| FBgn0030915 | 145297_at   | CG6179  | -             | -                                                                                                                                                                                                  | -   | -      | 1,5 | 4,6737  |
| FBgn0030973 | 154261_at   | CG7332  | -             | -                                                                                                                                                                                                  | -   | -      | 1,6 | 3,8954  |
| FBgn0031059 | 142464_at   | CG14229 | -             | -                                                                                                                                                                                                  | -   | -      | 1,6 | 4,1227  |
| FBgn0031062 | 154638_at   | CG14230 | -             | RNA binding                                                                                                                                                                                        | -   | -      | 1,5 | 3,8343  |
| FBgn0031070 | 145396_at   | CG12702 | -             | -                                                                                                                                                                                                  | -   | -      | 1,6 | 3,1704  |
| FBgn0031090 | 154069_at   | CG9575  | Rab35         | GTPase activity                                                                                                                                                                                    | -   | -      | 1,6 | 3,9612  |
| FBgn0031151 | 145455_at   | CG32512 | -             | -                                                                                                                                                                                                  | -   | -      | 1,8 | 5,7355  |
| FBgn0031152 | 145456_at   | CG32512 | -             | -                                                                                                                                                                                                  | -   | -      | 1,6 | 3,9722  |
| FBgn0031173 | 145473_at   | CG1696  | I(1)G0269     | -                                                                                                                                                                                                  | -   | -      | 1,6 | 4,439   |

|             |             |         |             |                                                                                                                                                              |     |        |     |         |
|-------------|-------------|---------|-------------|--------------------------------------------------------------------------------------------------------------------------------------------------------------|-----|--------|-----|---------|
| FBgn0031192 | 151481_s_at | CG14616 | I(1)G0196   | -                                                                                                                                                            | -   | -      | 1,5 | 3,7308  |
| FBgn0031360 | 154613_at   | CG31937 | -           | oxidoreductase activity, acting on the CH-OH group of donors, NAD or NADP as acceptor                                                                        | -   | -      | 1,5 | 4,1871  |
| FBgn0031398 | 154325_at   | CG10880 | -           | -                                                                                                                                                            | -   | -      | 1,6 | 4,5516  |
| FBgn0031434 | 145649_at   | CG3227  | insv        | -                                                                                                                                                            | -   | -      | 1,6 | 6,1095  |
| FBgn0031435 | 153717_at   | CG9883  | -           | -                                                                                                                                                            | -   | -      | 1,7 | 4,7735  |
| FBgn0031452 | 145663_at   | CG2843  | -           | -                                                                                                                                                            | 1,6 | 2,9301 | -   | -       |
| FBgn0031498 | 155084_at   | CG17260 | -           | -                                                                                                                                                            | -   | -      | 2,1 | 3,2243  |
| FBgn0031609 | 145763_at   | CG15443 | -           | -                                                                                                                                                            | -   | -      | 1,6 | 3,0559  |
| FBgn0031610 | 154618_at   | CG15436 | -           | transcription regulator activity                                                                                                                             | -   | -      | 1,9 | 3,3247  |
| FBgn0031739 | 154906_at   | CG14005 | -           | -                                                                                                                                                            | -   | -      | 1,7 | 3,7607  |
| FBgn0031741 | 145847_at   | CG11034 | -           | -                                                                                                                                                            | -   | -      | 1,7 | 5,0193  |
| FBgn0031773 | 145868_at   | CG9144  | -           | -                                                                                                                                                            | -   | -      | 1,6 | 4,5185  |
| FBgn0031806 | 145894_at   | CG9506  | slam        | -                                                                                                                                                            | -   | -      | 1,7 | 5,8928  |
| FBgn0031843 | 154616_at   | CG31633 | -           | carrier activity / tocopherol binding                                                                                                                        | -   | -      | 1,6 | 3,3151  |
| FBgn0031871 | 153669_at   | CG10158 | -           | -                                                                                                                                                            | -   | -      | 1,6 | 4,2129  |
| FBgn0031882 | 145938_at   | CG9100  | Rab30       | GTPase activity                                                                                                                                              | -   | -      | 1,6 | 2,9816  |
| FBgn0031886 | 141632_at   | CG8902  | -           | -                                                                                                                                                            | -   | -      | 1,6 | 4,313   |
| FBgn0031893 | 155153_at   | CG4495  | -           | -                                                                                                                                                            | -   | -      | 1,6 | 3,831   |
| FBgn0031895 | 142856_at   | CG4497  | -           | -                                                                                                                                                            | -   | -      | 1,6 | 4,5168  |
| FBgn0031896 | 142056_at   | CG4502  | -           | -                                                                                                                                                            | -   | -      | 1,7 | 3,3999  |
| FBgn0031996 | 153927_at   | CG8460  | -           | -                                                                                                                                                            | -   | -      | 1,7 | 6,167   |
| FBgn0032022 | 146022_at   | CG14275 | -           | -                                                                                                                                                            | 1,9 | 3,2927 | 2,9 | 6,6405  |
| FBgn0032040 | 151676_at   | CG13386 | -           | molecular_function unknown                                                                                                                                   | -   | -      | 2,0 | 4,2727  |
| FBgn0032043 | 146034_at   | CG13399 | Chrac-14    | single-stranded DNA specific endodeoxyribonuclease activity                                                                                                  | -   | -      | 1,7 | 10,8253 |
| FBgn0032056 | 146041_at   | CG18042 | Img         | -                                                                                                                                                            | -   | -      | 1,5 | 4,232   |
| FBgn0032059 | 146044_at   | CG9296  | -           | cGMP-specific phosphodiesterase activity                                                                                                                     | -   | -      | 1,6 | 3,0969  |
| FBgn0032189 | 146128_at   | CG18145 | -           | -                                                                                                                                                            | -   | -      | 1,9 | 5,406   |
| FBgn0032243 | 142536_at   | CG5300  | Klp31E      | microtubule motor activity / motor activity / structural constituent of cytoskeleton                                                                         | -   | -      | 1,6 | 3,1028  |
| FBgn0032250 | 152523_at   | CG5198  | -           | molecular_function unknown                                                                                                                                   | -   | -      | 1,7 | 4,4499  |
| FBgn0032251 | 146160_at   | CG13142 | -           | -                                                                                                                                                            | -   | -      | 1,7 | 3,7855  |
| FBgn0032262 | 155142_at   | CG7384  | -           | -                                                                                                                                                            | -   | -      | 2,1 | 5,4795  |
| FBgn0032354 | 146236_at   | CG4788  | -           | -                                                                                                                                                            | -   | -      | 1,5 | 6,1827  |
| FBgn0032356 | 146238_at   | CG3694  | cana        | -                                                                                                                                                            | -   | -      | 1,7 | 3,4458  |
| FBgn0032594 | 146370_at   | CG4711  | sku         | protein kinase activity / protein serine/threonine kinase activity / receptor signaling protein serine/threonine kinase activity                             | -   | -      | 1,7 | 5,2537  |
| FBgn0032635 | 154299_at   | CG15141 | -           | -                                                                                                                                                            | -   | -      | 1,8 | 5,1322  |
| FBgn0032714 | 154326_at   | CG17322 | -           | 2-hydroxyacylsphingosine 1-beta-galactosyltransferase activity                                                                                               | -   | -      | 1,7 | 4,1539  |
| FBgn0032725 | 146460_at   | CG10679 | Nedd8       | protein binding                                                                                                                                              | -   | -      | 1,5 | 5,381   |
| FBgn0032752 | 154745_at   | CG10702 | -           | insulin-like growth factor receptor activity                                                                                                                 | -   | -      | 2,0 | 3,6199  |
| FBgn0032760 | 152500_at   | CG10563 | -           | general RNA polymerase II transcription factor activity / transcription regulator activity                                                                   | -   | -      | 1,7 | 3,7512  |
| FBgn0032789 | 146498_at   | CG13083 | -           | -                                                                                                                                                            | -   | -      | 1,6 | 5,0692  |
| FBgn0032823 | 146514_at   | CG10528 | fs(2)toPP43 | -                                                                                                                                                            | -   | -      | 1,6 | 4,4647  |
| FBgn0032882 | 153711_at   | CG9320  | -           | GTP binding / hydrolase activity, acting on acid anhydrides, in phosphorus-containing anhydrides / nucleic acid binding                                      | -   | -      | 1,7 | 5,5752  |
| FBgn0032890 | 151641_at   | CG31673 | -           | glyoxylate reductase (NADP) activity                                                                                                                         | -   | -      | 1,7 | 4,7117  |
| FBgn0032907 | 146565_at   | CG9272  | -           | nucleic acid binding / pyrimidine-specific oxidized base lesion DNA N-glycosylase activity                                                                   | -   | -      | 1,6 | 3,0641  |
| FBgn0032929 | 155063_at   | CG9241  | Mcm10       | -                                                                                                                                                            | -   | -      | 1,7 | 4,6482  |
| FBgn0032998 | 153781_at   | CG17478 | -           | -                                                                                                                                                            | -   | -      | 2,1 | 3,829   |
| FBgn0033082 | 154155_at   | CG3273  | sced        | -                                                                                                                                                            | -   | -      | 1,7 | 7,1376  |
| FBgn0033109 | 146698_at   | CG9446  | coro        | actin binding / structural constituent of cytoskeleton                                                                                                       | -   | -      | 1,6 | 5,6279  |
| FBgn0033156 | 141608_at   | CG12165 | Incenp      | -                                                                                                                                                            | -   | -      | 1,6 | 4,8541  |
| FBgn0033177 | 154461_at   | CG11141 | -           | -                                                                                                                                                            | -   | -      | 1,8 | 5,2185  |
| FBgn0033233 | 142811_at   | CG15835 | -           | transcription cofactor activity / transcription regulator activity                                                                                           | -   | -      | 1,6 | 6,6376  |
| FBgn0033234 | 153231_at   | CG8791  | -           | high affinity inorganic phosphate:sodium symporter activity                                                                                                  | 2,1 | 3,4069 | 3,7 | 5,9369  |
| FBgn0033236 | 154856_at   | CG14764 | -           | -                                                                                                                                                            | -   | -      | 1,8 | 4,3107  |
| FBgn0033239 | 146778_at   | CG14764 | -           | -                                                                                                                                                            | -   | -      | 1,6 | 2,7809  |
| FBgn0033242 | 146780_at   | CG2916  | Sep5        | GTPase activity / structural constituent of cytoskeleton                                                                                                     | -   | -      | 1,8 | 4,126   |
| FBgn0033316 | 154427_at   | CG14749 | -           | -                                                                                                                                                            | -   | -      | 1,7 | 8,4178  |
| FBgn0033395 | 152833_at   | CG1944  | Cyp4p2      | electron transporter activity / oxidoreductase activity                                                                                                      | 1,8 | 5,1058 | 2,6 | 8,603   |
| FBgn0033414 | 146882_at   | CG11804 | ced-6       | receptor binding                                                                                                                                             | -   | -      | 1,5 | 4,479   |
| FBgn0033427 | 154357_at   | CG1868  | -           | -                                                                                                                                                            | -   | -      | 1,7 | 3,0679  |
| FBgn0033453 | 154443_at   | CG1667  | -           | -                                                                                                                                                            | -   | -      | 1,8 | 6,1576  |
| FBgn0033456 | 153430_at   | CG10536 | cbx         | -                                                                                                                                                            | -   | -      | 1,5 | 3,8341  |
| FBgn0033458 | 146908_at   | CG18446 | -           | -                                                                                                                                                            | 1,6 | 2,8189 | -   | -       |
| FBgn0033466 | 154695_at   | CG12130 | -           | -                                                                                                                                                            | -   | -      | 1,6 | 4,2828  |
| FBgn0033475 | 154020_at   | CG12129 | -           | -                                                                                                                                                            | -   | -      | 1,7 | 5,5187  |
| FBgn0033518 | 146946_s_at | CG11765 | Prx2540-2   | antioxidant activity / antioxidant activity / non-selenium glutathione peroxidase activity / peroxidase activity / peroxidase activity / peroxidase activity | -   | -      | 1,7 | 9,5971  |
| FBgn0033519 | 146947_at   | CG11825 | -           | -                                                                                                                                                            | 1,5 | 3,5679 | 2,5 | 7,8211  |
| FBgn0033584 | 151723_at   | CG7737  | -           | oxidoreductase activity                                                                                                                                      | -   | -      | 1,7 | 3,1369  |
| FBgn0033607 | 147005_at   | CG9062  | -           | -                                                                                                                                                            | -   | -      | 1,7 | 5,0343  |
| FBgn0033638 | 147023_at   | CG9005  | -           | -                                                                                                                                                            | -   | -      | 1,6 | 4,0919  |
| FBgn0033656 | 147040_at   | CG8988  | S2P         | metalloendopeptidase activity / sterol regulatory element-binding protein site 2 protease activity                                                           | -   | -      | 2,0 | 5,7452  |
| FBgn0033670 | 154801_at   | CG8290  | -           | general RNA polymerase II transcription factor activity                                                                                                      | -   | -      | 1,5 | 3,6557  |
| FBgn0033675 | 142664_at   | CG8889  | -           | -                                                                                                                                                            | -   | -      | 1,5 | 4,3315  |
| FBgn0033683 | 147055_at   | CG18343 | -           | -                                                                                                                                                            | -   | -      | 1,6 | 5,2161  |
| FBgn0033757 | 147107_at   | CG8811  | muskelin    | -                                                                                                                                                            | -   | -      | 1,8 | 3,4574  |
| FBgn0033762 | 147110_at   | CG8632  | -           | -                                                                                                                                                            | -   | -      | 1,7 | 3,1888  |
| FBgn0033827 | 147145_at   | CG17047 | -           | -                                                                                                                                                            | -   | -      | 1,5 | 3,0722  |
| FBgn0033845 | 154035_at   | CG17064 | mars        | -                                                                                                                                                            | -   | -      | 1,7 | 4,2296  |
| FBgn0033881 | 147175_at   | CG13345 | RacGAP50C   | diacylglycerol binding / GTPase activator activity / Rho GTPase activator activity / signal transducer activity                                              | -   | -      | 1,5 | 5,8767  |
| FBgn0033898 | 141695_at   | CG8241  | -           | ATP-dependent RNA helicase activity / pre-mRNA splicing factor activity                                                                                      | -   | -      | 1,5 | 4,4082  |
| FBgn0033921 | 147193_at   | CG8589  | -           | -                                                                                                                                                            | -   | -      | 1,9 | 7,8243  |
| FBgn0033941 | 154835_at   | CG10110 | cpsf        | -                                                                                                                                                            | -   | -      | 1,7 | 4,447   |
| FBgn0033945 | 147210_at   | CG12868 | -           | -                                                                                                                                                            | -   | -      | 1,9 | 4,5401  |
| FBgn0033986 | 147229_at   | CG10261 | aPKC        | diacylglycerol binding / protein binding / protein serine/threonine kinase activity / receptor signaling protein serine/threonine kinase activity            | -   | -      | 1,6 | 4,7513  |
| FBgn0034046 | 141221_at   | CG8253  | tun         | -                                                                                                                                                            | -   | -      | 1,8 | 3,1023  |
| FBgn0034064 | 153183_at   | CG8392  | I(2)05070   | endopeptidase activity                                                                                                                                       | -   | -      | 1,5 | 5,2234  |
| FBgn0034080 | 142651_at   | CG30094 | -           | -                                                                                                                                                            | -   | -      | 1,7 | 3,6264  |
| FBgn0034114 | 154012_at   | CG4282  | -           | transcription regulator activity                                                                                                                             | -   | -      | 1,5 | 3,3132  |
| FBgn0034185 | 154614_at   | CG8961  | tef         | -                                                                                                                                                            | -   | -      | 1,7 | 5,1527  |
| FBgn0034250 | 141797_at   | CG4924  | icln        | -                                                                                                                                                            | -   | -      | 1,8 | 5,8425  |
| FBgn0034320 | 151659_at   | CG5580  | sbp         | -                                                                                                                                                            | -   | -      | 1,7 | 4,0385  |
| FBgn0034366 | 147451_at   | CG5489  | Atg7        | binding / carrier activity                                                                                                                                   | -   | -      | 1,6 | 5,0026  |
| FBgn0034398 | 147469_at   | CG15098 | -           | -                                                                                                                                                            | -   | -      | 1,6 | 6,6121  |
| FBgn0034470 | 147516_at   | CG11518 | Obp56d      | -                                                                                                                                                            | 3,2 | 5,7557 | -   | -       |
| FBgn0034531 | 142091_at   | CG30149 | rig         | ligand-dependent nuclear receptor transcription coactivator activity / protein binding                                                                       | -   | -      | 1,8 | 3,2821  |
| FBgn0034594 | 141200_at   | CG9418  | -           | DNA binding / transcription regulator activity                                                                                                               | -   | -      | 1,5 | 3,8368  |
| FBgn0034640 | 154994_at   | CG9858  | clt         | carboxylesterase activity                                                                                                                                    | -   | -      | 1,9 | 3,0203  |
| FBgn0034703 | 152372_at   | CG3045  | -           | -                                                                                                                                                            | -   | -      | 1,7 | 4,7416  |
| FBgn0034878 | 153852_at   | CG3941  | pita        | transcription regulator activity                                                                                                                             | -   | -      | 1,6 | 3,4341  |
| FBgn0034933 | 154746_at   | CG3735  | -           | -                                                                                                                                                            | -   | -      | 1,6 | 3,5267  |
| FBgn0034980 | 154372_at   | CG4057  | tamo        | -                                                                                                                                                            | -   | -      | 1,6 | 4,319   |
| FBgn0035025 | 154497_at   | CG11416 | -           | -                                                                                                                                                            | -   | -      | 1,6 | 3,1148  |
| FBgn0035061 | 154579_at   | CG30422 | -           | -                                                                                                                                                            | -   | -      | 1,6 | 5,3403  |
| FBgn0035136 | 147928_at   | CG6905  | -           | pre-mRNA splicing factor activity / transcription regulator activity                                                                                         | -   | -      | 1,6 | 3,2824  |
| FBgn0035151 | 154989_at   | CG17129 | -           | -                                                                                                                                                            | -   | -      | 1,8 | 4,5036  |
| FBgn0035160 | 147938_at   | CG13897 | -           | -                                                                                                                                                            | -   | -      | 1,5 | 3,645   |
| FBgn0035189 | 152102_at   | CG9119  | -           | -                                                                                                                                                            | 1,6 | 2,9688 | -   | -       |
| FBgn0035208 | 147969_at   | CG9184  | -           | -                                                                                                                                                            | 1,9 | 6,5671 | -   | -       |
| FBgn0035209 | 147970_at   | CG13914 | -           | -                                                                                                                                                            | -   | -      | 1,7 | 5,7922  |
| FBgn0035350 | 155102_at   | CG16757 | Spn         | -                                                                                                                                                            | -   | -      | 1,7 | 3,5928  |
| FBgn0035414 | 141266_at   | CG14965 | -           | -                                                                                                                                                            | -   | -      | 1,7 | 4,5611  |
| FBgn0035425 | 154425_at   | CG17746 | -           | protein serine/threonine phosphatase activity                                                                                                                | -   | -      | 1,7 | 6,4667  |

|             |             |         |               |                                                                                                                                                                                 |   |     |     |        |     |         |
|-------------|-------------|---------|---------------|---------------------------------------------------------------------------------------------------------------------------------------------------------------------------------|---|-----|-----|--------|-----|---------|
| FBgn0035428 | 148099_at   | CG14960 | -             | -                                                                                                                                                                               | - | -   | 1,5 | -      | 1,5 | 4,224   |
| FBgn0035434 | 148103_at   | CG10812 | dro5          | -                                                                                                                                                                               | - | -   | -   | 6,445  | 1,6 | 7,6576  |
| FBgn0035461 | 153770_at   | CG10855 | -             | -                                                                                                                                                                               | - | -   | -   | -      | 1,9 | 3,9322  |
| FBgn0035462 | 148124_at   | CG1120  | -             | -                                                                                                                                                                               | - | -   | -   | -      | 2,4 | 4,7733  |
| FBgn0035511 | 148155_at   | CG15007 | -             | structural constituent of larval cuticle (sensu Insecta)                                                                                                                        | - | -   | -   | -      | 1,9 | 2,8503  |
| FBgn0035611 | 148226_at   | CG13285 | -             | -                                                                                                                                                                               | - | 1,8 | -   | 3,0002 | -   | -       |
| FBgn0035617 | 155154_at   | CG5146  | -             | -                                                                                                                                                                               | - | -   | -   | -      | 1,5 | 3,4827  |
| FBgn0035621 | 154354_at   | CG10591 | -             | -                                                                                                                                                                               | - | 2,0 | -   | 7,629  | -   | -       |
| FBgn0035640 | 148237_at   | CG17498 | mad2          | -                                                                                                                                                                               | - | -   | -   | -      | 1,8 | 8,997   |
| FBgn0035641 | 141286_at   | CG5568  | -             | 4-coumarate-CoA ligase activity / ligase activity                                                                                                                               | - | -   | -   | -      | 2,2 | 3,3533  |
| FBgn0035705 | 154361_at   | CG18769 | -             | -                                                                                                                                                                               | - | -   | -   | -      | 1,6 | 4,2946  |
| FBgn0035821 | 148362_at   | CG32365 | -             | -                                                                                                                                                                               | - | -   | -   | -      | 1,7 | 2,9865  |
| FBgn0035822 | 148363_at   | CG32365 | -             | -                                                                                                                                                                               | - | -   | -   | -      | 1,5 | 3,4819  |
| FBgn0035842 | 148373_at   | CG7504  | -             | ATP-dependent RNA helicase activity / DNA helicase activity / nucleic acid binding                                                                                              | - | -   | -   | -      | 1,7 | 3,1418  |
| FBgn0035876 | 141211_at   | CG7081  | -             | -                                                                                                                                                                               | - | -   | -   | -      | 1,5 | 2,7846  |
| FBgn0035918 | 154316_at   | CG5971  | -             | DNA clamp loader activity / DNA replication origin binding                                                                                                                      | - | -   | -   | -      | 1,6 | 5,4274  |
| FBgn0035945 | 141294_at   | CG5026  | -             | protein tyrosine/serine/threonine phosphatase activity                                                                                                                          | - | -   | -   | -      | 1,7 | 5,4477  |
| FBgn0035959 | 148444_at   | CG4911  | -             | -                                                                                                                                                                               | - | -   | -   | -      | 1,5 | 5,9144  |
| FBgn0035961 | 153070_at   | CG4821  | Tequila       | pancreatic elastase activity / serine-type endopeptidase activity / trypsin activity                                                                                            | - | -   | -   | -      | 1,6 | 6,308   |
| FBgn0036020 | 152064_at   | CG8336  | -             | isomerase activity                                                                                                                                                              | - | -   | -   | -      | 1,6 | 3,2253  |
| FBgn0036117 | 153845_at   | CG6321  | -             | transaminase activity / transferase activity                                                                                                                                    | - | -   | -   | -      | 1,6 | 4,1123  |
| FBgn0036120 | 153797_at   | CG7869  | SuUR          | -                                                                                                                                                                               | - | -   | -   | -      | 1,6 | 3,7649  |
| FBgn0036247 | 153973_at   | CG6801  | I(3)2D3       | -                                                                                                                                                                               | - | -   | -   | -      | 1,5 | 3,0289  |
| FBgn0036248 | 154560_at   | CG17153 | -             | -                                                                                                                                                                               | - | -   | -   | -      | 1,7 | 4,2551  |
| FBgn0036272 | 148648_at   | CG4300  | -             | -                                                                                                                                                                               | - | -   | -   | -      | 1,5 | 8,8001  |
| FBgn0036312 | 155126_at   | CG17667 | -             | -                                                                                                                                                                               | - | -   | -   | -      | 1,5 | 3,3955  |
| FBgn0036330 | 148687_at   | CG11263 | -             | -                                                                                                                                                                               | - | -   | -   | -      | 2,1 | 4,6969  |
| FBgn0036352 | 148705_at   | CG14110 | -             | -                                                                                                                                                                               | - | 1,9 | -   | 5,8211 | -   | -       |
| FBgn0036354 | 153557_at   | CG10191 | -             | -                                                                                                                                                                               | - | -   | -   | -      | 1,6 | 4,5163  |
| FBgn0036395 | 148737_at   | CG17361 | -             | -                                                                                                                                                                               | - | -   | -   | -      | 1,7 | 3,9605  |
| FBgn0036402 | 154248_at   | CG6650  | -             | -                                                                                                                                                                               | - | -   | -   | -      | 1,6 | 3,7432  |
| FBgn0036423 | 153907_at   | CG3919  | -             | -                                                                                                                                                                               | - | -   | -   | -      | 1,5 | 3,0932  |
| FBgn0036565 | 148844_at   | CG5235  | -             | dopamine beta-monoxygenase activity                                                                                                                                             | - | -   | -   | -      | 1,6 | 3,226   |
| FBgn0036612 | 148885_at   | CG4998  | -             | NOT serine-type endopeptidase activity                                                                                                                                          | - | -   | -   | -      | 1,8 | 3,341   |
| FBgn0036625 | 153654_at   | CG4877  | -             | -                                                                                                                                                                               | - | -   | -   | -      | 1,6 | 4,5468  |
| FBgn0036641 | 154173_at   | CG16725 | Smn           | -                                                                                                                                                                               | - | -   | -   | -      | 1,5 | 7,893   |
| FBgn0036661 | 141237_at   | CG9705  | -             | nucleic acid binding / RNA binding                                                                                                                                              | - | -   | -   | -      | 1,5 | 5,089   |
| FBgn0036689 | 154559_at   | CG7730  | -             | -                                                                                                                                                                               | - | 1,5 | -   | 4,3222 | 2,3 | 5,5655  |
| FBgn0036777 | 153818_at   | CG7341  | -             | molecular_function unknown                                                                                                                                                      | - | -   | -   | -      | 1,6 | 2,9063  |
| FBgn0036800 | 154409_at   | CG6897  | -             | -                                                                                                                                                                               | - | -   | -   | -      | 1,5 | 5,8346  |
| FBgn0036847 | 142238_at   | CG11577 | -             | -                                                                                                                                                                               | - | -   | -   | -      | 1,5 | 4,8313  |
| FBgn0036850 | 141250_at   | CG10419 | -             | -                                                                                                                                                                               | - | -   | -   | -      | 1,6 | 4,3248  |
| FBgn0036856 | 154328_at   | CG9666  | -             | -                                                                                                                                                                               | - | -   | -   | -      | 1,5 | 5,0335  |
| FBgn0036863 | 154347_at   | CG9670  | fal           | -                                                                                                                                                                               | - | -   | -   | -      | 1,7 | 5,5112  |
| FBgn0036955 | 155096_at   | CG17149 | -             | oxidoreductase activity                                                                                                                                                         | - | -   | -   | -      | 1,5 | 4,4254  |
| FBgn0036980 | 154298_at   | CG5701  | RhoBTB        | GTPase activity                                                                                                                                                                 | - | -   | -   | -      | 1,7 | 5,6916  |
| FBgn0037006 | 153241_at   | CG32425 | -             | -                                                                                                                                                                               | - | -   | -   | -      | 1,6 | 5,5562  |
| FBgn0037019 | 153962_at   | CG3947  | -             | -                                                                                                                                                                               | - | 1,6 | -   | 3,266  | 1,7 | 3,6519  |
| FBgn0037082 | 141519_at   | CG5664  | -             | -                                                                                                                                                                               | - | -   | -   | -      | 1,9 | 4,4476  |
| FBgn0037084 | 154189_at   | CG7736  | Syx6          | -                                                                                                                                                                               | - | -   | -   | -      | 1,5 | 4,8071  |
| FBgn0037095 | 149186_at   | CG7184  | Mkrn1         | -                                                                                                                                                                               | - | -   | -   | -      | 1,6 | 6,5367  |
| FBgn0037106 | 153689_at   | CG11307 | -             | -                                                                                                                                                                               | - | -   | -   | -      | 1,7 | 5,3032  |
| FBgn0037156 | 153126_at   | CG11523 | -             | -                                                                                                                                                                               | - | -   | -   | -      | 1,5 | 3,9426  |
| FBgn0037205 | 153555_at   | CG11133 | -             | -                                                                                                                                                                               | - | 1,6 | -   | 3,6776 | 2,3 | 3,9766  |
| FBgn0037211 | 142644_s_at | CG12414 | nAcRalpha-80B | acetylcholine receptor activity / nicotinic acetylcholine-activated cation-selective channel activity                                                                           | - | -   | -   | -      | 1,9 | 7,0998  |
| FBgn0037212 | 142645_r_at | CG12414 | nAcR-80B      | acetylcholine receptor activity / nicotinic acetylcholine-activated cation-selective channel activity                                                                           | - | -   | -   | -      | 1,7 | 3,4079  |
| FBgn0037327 | 149333_at   | CG2087  | PEK           | eukaryotic elongation factor-2 kinase activity / protein kinase activity / receptor signaling protein serine/threonine kinase activity / translation initiation factor activity | - | -   | -   | -      | 1,6 | 6,3357  |
| FBgn0037349 | 149342_at   | CG14672 | Spec2         | -                                                                                                                                                                               | - | -   | -   | -      | 1,6 | 3,8339  |
| FBgn0037359 | 149346_at   | CG1245  | MED27         | -                                                                                                                                                                               | - | -   | -   | -      | 1,7 | 4,2105  |
| FBgn0037376 | 149351_at   | CG2051  | -             | histone acetyltransferase activity                                                                                                                                              | - | -   | -   | -      | 1,5 | 5,6529  |
| FBgn0037468 | 149420_at   | CG1943  | -             | -                                                                                                                                                                               | - | -   | -   | -      | 1,5 | 4,6401  |
| FBgn0037479 | 154519_at   | CG33546 | gfzf          | -                                                                                                                                                                               | - | -   | -   | -      | 1,6 | 3,9661  |
| FBgn0037487 | 149433_at   | CG14608 | -             | -                                                                                                                                                                               | - | 5,8 | -   | 3,4664 | -   | -       |
| FBgn0037491 | 153896_at   | CG1227  | -             | protein kinase activity / protein serine/threonine kinase activity / receptor signaling protein serine/threonine kinase activity                                                | - | -   | -   | -      | 1,5 | 4,2732  |
| FBgn0037595 | 154278_at   | CG31453 | -             | transcription cofactor activity                                                                                                                                                 | - | -   | -   | -      | 1,6 | 2,9322  |
| FBgn0037614 | 149520_at   | CG8116  | -             | -                                                                                                                                                                               | - | -   | -   | -      | 1,6 | 5,0364  |
| FBgn0037620 | 142783_at   | CG9793  | -             | transcription regulator activity                                                                                                                                                | - | -   | -   | -      | 1,8 | 3,4407  |
| FBgn0037624 | 155060_at   | CG8223  | -             | -                                                                                                                                                                               | - | -   | -   | -      | 1,6 | 7,3791  |
| FBgn0037655 | 153500_at   | CG11984 | -             | potassium channel regulator activity                                                                                                                                            | - | -   | -   | -      | 1,7 | 5,8888  |
| FBgn0037710 | 154154_at   | CG9393  | -             | P-P-bond-hydrolysis-driven transporter activity                                                                                                                                 | - | -   | -   | -      | 1,5 | 3,2269  |
| FBgn0037717 | 154329_at   | CG8301  | -             | transcription regulator activity                                                                                                                                                | - | -   | -   | -      | 1,7 | 3,3275  |
| FBgn0037746 | 154179_at   | CG8478  | -             | -                                                                                                                                                                               | - | -   | -   | -      | 1,6 | 5,8797  |
| FBgn0037756 | 154479_at   | CG8507  | -             | -                                                                                                                                                                               | - | -   | -   | -      | 1,6 | 2,9228  |
| FBgn0037792 | 154727_at   | CG6241  | -             | -                                                                                                                                                                               | - | -   | -   | -      | 1,6 | 3,6446  |
| FBgn0037844 | 153457_at   | CG4570  | -             | -                                                                                                                                                                               | - | -   | -   | -      | 1,9 | 10,2238 |
| FBgn0037878 | 153550_at   | CG6693  | -             | -                                                                                                                                                                               | - | -   | -   | -      | 1,5 | 5,0586  |
| FBgn0037881 | 149678_at   | CG10703 | -             | -                                                                                                                                                                               | - | -   | -   | -      | 1,6 | 2,9121  |
| FBgn0037894 | 141400_at   | CG5252  | Ranbp9        | RAN protein binding                                                                                                                                                             | - | -   | -   | -      | 1,5 | 3,1432  |
| FBgn0038047 | 149776_at   | CG2445  | -             | transcription regulator activity                                                                                                                                                | - | -   | -   | -      | 1,9 | 3,4653  |
| FBgn0038058 | 141609_at   | CG5608  | -             | -                                                                                                                                                                               | - | -   | -   | -      | 1,8 | 4,3002  |
| FBgn0038059 | 149782_at   | CG6489  | Hsp70Bc       | -                                                                                                                                                                               | - | 1,6 | -   | 3,4138 | 0,4 | 4,612   |
| FBgn0038169 | 153775_at   | CG9351  | fff           | -                                                                                                                                                                               | - | -   | -   | -      | 1,6 | 5,9381  |
| FBgn0038251 | 154534_at   | CG3508  | -             | -                                                                                                                                                                               | - | -   | -   | -      | 1,5 | 5,4792  |
| FBgn0038256 | 155074_at   | CG7530  | -             | -                                                                                                                                                                               | - | 1,6 | -   | 4,0375 | 2,1 | 5,0605  |
| FBgn0038388 | 152212_at   | CG4287  | -             | -                                                                                                                                                                               | - | -   | -   | -      | 1,6 | 3,5877  |
| FBgn0038428 | 150015_at   | CG14894 | -             | -                                                                                                                                                                               | - | -   | -   | -      | 1,7 | 3,8414  |
| FBgn0038470 | 150044_at   | CG18213 | -             | -                                                                                                                                                                               | - | -   | -   | -      | 1,7 | 4,868   |
| FBgn0038487 | 154015_at   | CG4060  | -             | -                                                                                                                                                                               | - | -   | -   | -      | 1,8 | 4,8731  |
| FBgn0038489 | 150057_at   | CG12265 | -             | -                                                                                                                                                                               | - | -   | -   | -      | 1,5 | 4,2399  |
| FBgn0038517 | 153862_at   | CG5824  | I(3)07882     | -                                                                                                                                                                               | - | -   | -   | -      | 1,5 | 4,2399  |
| FBgn0038538 | 155012_at   | CG7660  | pxt           | peroxidase activity                                                                                                                                                             | - | 1,6 | -   | 3,3127 | -   | -       |
| FBgn0038551 | 142817_at   | CG7357  | -             | -                                                                                                                                                                               | - | -   | -   | -      | 1,6 | 4,3709  |
| FBgn0038588 | 154268_at   | CG7156  | -             | protein kinase activity                                                                                                                                                         | - | -   | -   | -      | 1,7 | 3,5558  |
| FBgn0038650 | 154706_at   | CG7719  | gwl           | protein kinase activity / protein serine/threonine kinase activity / receptor signaling protein serine/threonine kinase activity                                                | - | -   | -   | -      | 1,7 | 5,3474  |
| FBgn0038733 | 152819_at   | CG11407 | -             | ligase activity / long-chain fatty acid transporter activity                                                                                                                    | - | 3,7 | -   | 4,9429 | 2,6 | 3,7286  |
| FBgn0038767 | 150241_at   | CG4413  | -             | transcription regulator activity                                                                                                                                                | - | -   | -   | -      | 1,7 | 3,4222  |
| FBgn0038772 | 154702_at   | CG4973  | -             | -                                                                                                                                                                               | - | -   | -   | -      | 1,9 | 4,9555  |
| FBgn0038828 | 142610_at   | CG17270 | -             | -                                                                                                                                                                               | - | -   | -   | -      | 1,6 | 3,1286  |
| FBgn0038857 | 142442_at   | CG17282 | -             | -                                                                                                                                                                               | - | 1,6 | -   | 3,0212 | 2,0 | 2,9843  |
| FBgn0038962 | 150364_at   | CG31285 | -             | molecular_function unknown                                                                                                                                                      | - | -   | -   | -      | 1,6 | 2,9411  |
| FBgn0038992 | 153756_at   | CG31156 | -             | chromatin binding / nucleic acid binding / RNA binding                                                                                                                          | - | -   | -   | -      | 1,6 | 3,3385  |
| FBgn0039021 | 151680_at   | CG31139 | -             | -                                                                                                                                                                               | - | -   | -   | -      | 1,8 | 5,6574  |
| FBgn0039066 | 154444_at   | CG6755  | EloA          | transcription cofactor activity / transcriptional elongation regulator activity                                                                                                 | - | -   | -   | -      | 1,7 | 2,9076  |
| FBgn0039128 | 150472_at   | CG13599 | -             | microtubule motor activity / plus-end-directed microtubule motor activity / structural constituent of cytoskeleton                                                              | - | -   | -   | -      | 1,6 | 4,9676  |
| FBgn0039132 | 153802_at   | CG5864  | -             | -                                                                                                                                                                               | - | -   | -   | -      | 1,5 | 5,0592  |
| FBgn0039206 | 153609_at   | CG6631  | -             | -                                                                                                                                                                               | - | -   | -   | -      | 1,5 | 4,0836  |
| FBgn0039207 | 154494_at   | CG5789  | -             | ATPase activity, coupled to transmembrane movement of substances / transporter activity / xenobiotic-transporting ATPase activity                                               | - | 1,5 | -   | 3,1073 | 1,9 | 5,5436  |
| FBgn0039240 | 150534_at   | CG3744  | -             | serine-type peptidase activity                                                                                                                                                  | - | -   | -   | -      | 1,6 | 3,9368  |
| FBgn0039251 | 150539_at   | CG17462 | -             | nucleic acid binding / sigma DNA polymerase activity                                                                                                                            | - | 1,7 | -   | 4,2798 | 2,1 | 8,0085  |
| FBgn0039252 | 141475_at   | CG11771 | -             | -                                                                                                                                                                               | - | -   | -   | -      | 1,5 | 5,0017  |
| FBgn0039267 | 150548_at   | CG31109 | -             | -                                                                                                                                                                               | - | -   | -   | -      | 1,7 | 3,6647  |

|             |             |         |         |   |   |   |     |        |
|-------------|-------------|---------|---------|---|---|---|-----|--------|
| FBgn0039352 | 142128_at   | CG5053  | -       | - | - | - | 1,6 | 4,079  |
| FBgn0039355 | 150600_at   | CG4730  | -       | - | - | - | 1,9 | 6,3547 |
| FBgn0039449 | 150679_at   | CG6425  | -       | - | - | - | 1,9 | 4,9295 |
| FBgn0039488 | 150713_at   | CG6066  | -       | - | - | - | 1,7 | 3,6257 |
| FBgn0039543 | 141776_at   | CG12428 | -       | - | - | - | 1,6 | 5,4405 |
| FBgn0039544 | 150748_at   | CG12877 | -       | - | - | - | 1,7 | 3,0813 |
| FBgn0039558 | 142708_at   | CG4980  | -       | - | - | - | 1,5 | 4,6427 |
| FBgn0039638 | 153804_at   | CG11881 | -       | - | - | - | 1,8 | 5,5091 |
| FBgn0039644 | 153894_at   | CG11897 | -       | - | - | - | 1,6 | 4,7603 |
| FBgn0039668 | 150823_at   | CG2304  | Trc8    | - | - | - | 1,5 | 3,6477 |
| FBgn0039680 | 154905_at   | CG1911  | CAP-D2  | - | - | - | 1,5 | 3,6903 |
| FBgn0039705 | 141401_at   | CG31033 | -       | - | - | - | 1,6 | 3,7441 |
| FBgn0039712 | 154243_at   | CG15514 | -       | - | - | - | 1,5 | 4,4088 |
| FBgn0039740 | 153841_at   | CG7928  | -       | - | - | - | 1,5 | 3,8827 |
| FBgn0039861 | 154141_at   | CG1800  | pasha   | - | - | - | 1,7 | 4,0169 |
| FBgn0039870 | 154870_at   | CG1896  | -       | - | - | - | 1,6 | 3,6706 |
| FBgn0039881 | 153510_at   | CG1971  | -       | - | - | - | 1,9 | 3,6419 |
| FBgn0039888 | 150964_at   | CG1487  | krz     | - | - | - | 1,6 | 6,0859 |
| FBgn0040626 | 151112_s_at | CG15552 | Sox100B | - | - | - | 2,8 | 5,5017 |
| FBgn0040736 | 151211_at   | CG16844 | IM3     | - | - | - | 4,8 | 6,7979 |
| FBgn0040833 | 153602_at   | CG7498  | -       | - | - | - | 1,7 | 4,2813 |
| FBgn0040835 | 151308_at   | CG32365 | -       | - | - | - | 1,6 | 3,1552 |
| FBgn0040928 | 151397_at   | CG15345 | -       | - | - | - | 1,7 | 3,5601 |
| FBgn0040929 | 151398_at   | CG12659 | -       | - | - | - | 1,6 | 4,5842 |
| FBgn0040946 | 154370_at   | CG14033 | -       | - | - | - | 1,9 | 7,7195 |
| FBgn0040981 | 151442_at   | CG4482  | mol     | - | - | - | 1,6 | 7,4564 |

Downregulated genes:

| FB code     | Affy identifier           | CG numbers | Synonyms   | Description / Molecular function                                                                                                                                                               | Fold change st11 | t-value st11 | Fold change st12 | t-value st12 |
|-------------|---------------------------|------------|------------|------------------------------------------------------------------------------------------------------------------------------------------------------------------------------------------------|------------------|--------------|------------------|--------------|
| FBgn0000055 | 151802_at                 | CG3481     | Adh        | -                                                                                                                                                                                              | -2,5             | -8,2194      | -8,0             | -23,8077     |
| FBgn0000061 | 143065_at                 | CG3935     | al         | specific RNA polymerase II transcription factor activity / transcription factor activity                                                                                                       | -                | -            | -1,9             | -5,4237      |
| FBgn0000075 | 143066_at                 | CG10501    | amd        | aromatic-L-amino-acid decarboxylase activity / carboxy-lyase activity                                                                                                                          | -2,1             | -5,1416      | -1,5             | -4,6981      |
| FBgn0000095 | 142814_at                 | CG1028     | Antp       | specific RNA polymerase II transcription factor activity                                                                                                                                       | -1,9             | -3,3502      | -1,7             | -3,0894      |
| FBgn0000150 | 142560_at                 | CG2210     | awd        | nucleoside-diphosphate kinase activity / nucleotide kinase activity                                                                                                                            | -                | -            | -1,7             | -3,7198      |
| FBgn0000157 | 143081_at                 | CG3629     | Dll        | specific RNA polymerase II transcription factor activity                                                                                                                                       | -1,9             | -2,9243      | -1,7             | -3,318       |
| FBgn0000165 | 151955_at                 | CG5779     | Bc         | -                                                                                                                                                                                              | -1,6             | -3,7614      | -3,2             | -9,6531      |
| FBgn0000299 | 153378_at                 | CG4145     | Cg25C      | extracellular matrix structural constituent / structural molecule activity                                                                                                                     | -1,9             | -5,1616      | -4,3             | -12,2501     |
| FBgn0000337 | 143103_at                 | CG1555     | cn         | -                                                                                                                                                                                              | -3,7             | -9,6807      | -1,6             | -4,43        |
| FBgn0000439 | 143122_at                 | CG2189     | Dfd        | RNA polymerase II transcription factor activity / transcription factor activity                                                                                                                | -2,1             | -5,2306      | -1,8             | -5,1953      |
| FBgn0000579 | 143150_at                 | CG17654    | Eno        | -                                                                                                                                                                                              | -                | -            | -1,6             | -5,0686      |
| FBgn0001091 | 154244_at                 | CG12055    | Gapdh1     | glyceraldehyde-3-phosphate dehydrogenase (phosphorylating) activity                                                                                                                            | -                | -            | -3,4             | -14,9483     |
| FBgn0001092 | 143175_at                 | CG8893     | Gapdh2     | glyceraldehyde-3-phosphate dehydrogenase (phosphorylating) activity                                                                                                                            | -                | -            | -2,9             | -9,2847      |
| FBgn0001114 | 141472_at                 | CG9280     | Git        | calcium ion binding                                                                                                                                                                            | -1,9             | -3,8028      | -2,4             | -6,9727      |
| FBgn0001145 | 143181_at                 | CG1743     | Gs2        | glutamate-ammonia ligase activity                                                                                                                                                              | -                | -            | -2,4             | -6,092       |
| FBgn0001149 | 143184_at                 | CG10045    | GstD1      | glutathione transferase activity                                                                                                                                                               | -                | -            | -2,3             | -7,9811      |
| FBgn0001208 | 153434_at                 | CG7399     | Hn         | tryptophan 5-monooxygenase activity                                                                                                                                                            | -                | -            | -1,7             | -6,9013      |
| FBgn0001226 | 153307_at                 | CG4466     | Hsp27      | -                                                                                                                                                                                              | -                | -            | -1,7             | -6,3693      |
| FBgn0001229 | 143196_at                 | CG4190     | Hsp67Bc    | -                                                                                                                                                                                              | -                | -            | -1,9             | -5,9677      |
| FBgn0001230 | 143197_at                 | CG5436     | Hsp68      | unfolded protein binding                                                                                                                                                                       | -                | -            | -2,2             | -4,6316      |
| FBgn0001233 | 143198_at                 | CG1242     | Hsp83      | ATPase activity, coupled                                                                                                                                                                       | -                | -            | -1,8             | -5,2296      |
| FBgn0001235 | 143199_at                 | CG17117    | hth        | specific RNA polymerase II transcription factor activity / transcription factor activity                                                                                                       | -2,0             | -6,9188      | -1,9             | -5,7129      |
| FBgn0001256 | 141386_at                 | CG10717    | ImpL1      | -                                                                                                                                                                                              | -                | -            | -1,5             | -3,4666      |
| FBgn0002031 | 152440_at                 | CG10691    | l(2)37Cc   | -                                                                                                                                                                                              | -                | -            | -1,8             | -3,718       |
| FBgn0002522 | 143230_at                 | CG1264     | lab        | specific RNA polymerase II transcription factor activity / transcription factor activity                                                                                                       | -                | -            | -2,7             | -5,2096      |
| FBgn0002561 | 143237_at                 | CG3839     | l(1)sc     | specific RNA polymerase II transcription factor activity / transcription factor activity                                                                                                       | -1,6             | -3,6547      | -                | -            |
| FBgn0002578 | 143245_at                 | CG8342     | m1         | serine-type endopeptidase inhibitor activity                                                                                                                                                   | -2,4             | -5,1284      | -2,7             | -11,0232     |
| FBgn0002741 | 143263_at                 | CG17927    | Mhc        | ATPase activity, coupled / cytoskeletal protein binding / microfilament motor activity / structural constituent of cytoskeleton / structural constituent of muscle                             | -                | -            | -2,0             | -4,8243      |
| FBgn0002772 | 143264_at                 | CG5596     | Mlc1       | ATPase activity, coupled / microfilament motor activity / NOT calcium ion binding                                                                                                              | -                | -            | -2,1             | -7,8301      |
| FBgn0002773 | 143265_at                 | CG2184     | Mlc2       | ATPase activity, coupled / calcium ion binding / calmodulin binding / microfilament motor activity                                                                                             | -                | -            | -2,1             | -5,7646      |
| FBgn0002789 | 143271_at                 | CG4696     | Mp20       | actin binding / calcium ion binding / structural constituent of cytoskeleton                                                                                                                   | -                | -            | -5,1             | -18,2751     |
| FBgn0002868 | 143276_at                 | CG9470     | MtnA       | metal ion binding                                                                                                                                                                              | -1,9             | -5,2107      | -2,5             | -10,2121     |
| FBgn0002921 | 151602_at                 | CG5670     | Atpalpha   | hydrolase activity, acting on acid anhydrides, catalyzing transmembrane movement of substances / sodium:potassium-exchanging ATPase activity                                                   | -                | -            | -1,6             | -2,8282      |
| FBgn0003057 | 143296_at                 | CG10598    | -          | -                                                                                                                                                                                              | -                | -            | -2,2             | -19,2688     |
| FBgn0003067 | 143299_at                 | CG17725    | Pepck      | phosphoenolpyruvate carboxykinase (GTP) activity                                                                                                                                               | -1,7             | -3,6468      | -2,0             | -7,442       |
| FBgn0003074 | 152515_at                 | CG8251     | Pgi        | phosphogluconate dehydrogenase (decarboxylating) activity                                                                                                                                      | -                | -            | -1,7             | -4,9858      |
| FBgn0003075 | 143301_at                 | CG3127     | Pgk        | carbohydrate kinase activity / phosphoglycerate kinase activity                                                                                                                                | -                | -            | -2,2             | -6,9739      |
| FBgn0003089 | 143305_at                 | CG9614     | pip        | heparin-sulfate 2-sulfotransferase activity / sulfotransferase activity                                                                                                                        | -1,8             | -6,5823      | -2,9             | -9,7353      |
| FBgn0003149 | 152555_at                 | CG5939     | Prm        | cytoskeletal protein binding / motor activity / structural constituent of cytoskeleton / structural constituent of muscle                                                                      | -                | -            | -2,1             | -9,1374      |
| FBgn0003178 | 141674_at                 | CG7070     | Pyk        | carbohydrate kinase activity / pyruvate kinase activity                                                                                                                                        | -                | -            | -2,3             | -7,2221      |
| FBgn0003187 | 143316_at                 | CG6433     | qua        | actin binding / calcium ion binding / structural constituent of cytoskeleton                                                                                                                   | -                | -            | -1,6             | -4,0332      |
| FBgn0003308 | 152200_at                 | CG7642     | ry         | xanthine dehydrogenase activity                                                                                                                                                                | -                | -            | -2,1             | -6,2458      |
| FBgn0003326 | 143333_at                 | CG17579    | sca        | receptor binding / signal transducer activity                                                                                                                                                  | -1,6             | -3,3097      | -                | -            |
| FBgn0003356 | 143338_f_at / 143339_i_at | CG10304    | Jon99Cii   | chymotrypsin activity / chymotrypsin activity / serine-type endopeptidase activity / serine-type endopeptidase activity / serine-type peptidase activity / serine-type peptidase activity      | -11,6            | -14,019      | -47,6            | -51,2387     |
| FBgn0003357 | 143340_f_at / 143339_i_at | CG13362    | Jon99Ciii  | chymotrypsin activity / chymotrypsin activity / serine-type endopeptidase activity / serine-type endopeptidase activity / serine-type peptidase activity / serine-type peptidase activity      | -18,0            | -23,073      | -88,5            | -37,7408     |
| FBgn0003358 | 143341_at                 | CG10309    | Jon99Ci    | elastase activity / serine-type endopeptidase activity                                                                                                                                         | -                | -            | -3,1             | -9,772       |
| FBgn0003411 | 143353_at                 | CG1641     | sisA       | protein heterodimerization activity / transcription factor activity                                                                                                                            | -1,9             | -5,7123      | -                | -            |
| FBgn0003507 | 141687_at                 | CG3992     | srp        | DNA binding / general RNA polymerase II transcription factor activity / RNA polymerase II transcription factor activity / transcriptional activator activity                                   | -                | -            | -1,7             | -3,8417      |
| FBgn0003738 | 152334_at                 | CG2171     | Tpi        | intramolecular transferase activity / triose-phosphate isomerase activity                                                                                                                      | -                | -            | -1,7             | -4,1505      |
| FBgn0003863 | 143385_at                 | CG18444    | epsilonTry | NOT serine-type endopeptidase activity / trypsin activity                    | -1,9             | -4,5846      | -8,1             | -14,8921     |
| FBgn0003944 | 143400_at                 | CG10388    | Ubx        | DNA binding / specific RNA polymerase II transcription factor activity / transcription factor activity                                                                                         | -7,8             | -9,3768      | -4,0             | -5,968       |
| FBgn0004028 | 143415_at                 | CG7178     | wupA       | actin binding / structural constituent of cytoskeleton / tropomyosin binding                                                                                                                   | -                | -            | -1,8             | -6,1503      |
| FBgn0004117 | 143427_at                 | CG4843     | Tm2        | actin binding / structural constituent of cytoskeleton                                                                                                                                         | -                | -            | -1,8             | -5,4259      |
| FBgn0004169 | 142555_at                 | CG7107     | up         | tropomyosin binding                                                                                                                                                                            | -                | -            | -1,7             | -3,6698      |
| FBgn0004396 | 143003_at                 | CG7450     | CrebA      | DNA binding / protein homodimerization activity / RNA polymerase II transcription factor activity / transcription factor activity                                                              | -                | -            | -1,5             | -2,9694      |
| FBgn0004425 | 143464_f_at               | CG1179     | LysB       | chitinase activity / lysozyme activity                                                                         | -2,8             | -6,6445      | -2,3             | -9,8709      |
| FBgn0004426 | 143465_f_at               | CG9111     | LysC       | chitinase activity / lysozyme activity                                                     | -3,0             | -7,715       | -2,4             | -8,2527      |
| FBgn0004427 | 143466_f_at               | CG9118     | LysD       | chitinase activity / lysozyme activity                                                     | -6,2             | -11,8067     | -5,6             | -10,4875     |
| FBgn0004428 | 143467_f_at               | CG1180     | LysE       | chitinase activity / lysozyme activity                                                     | -4,1             | -9,6155      | -2,5             | -10,4393     |
| FBgn0004430 | 143469_at                 | CG1165     | LysS       | chitinase activity / lysozyme activity                                                                         | -                | -            | -1,9             | -4,1806      |
| FBgn0004511 | 143475_at                 | CG9355     | dy         | structural constituent of cuticle (sensu Insecta)                                                                                                                                              | -                | -            | -1,7             | -4,3521      |
| FBgn0004782 | 143514_s_at               | CG1252     | Ccp84Ab    | structural constituent of larval cuticle (sensu Insecta)                                                                                                                                       | -3,5             | -7,116       | -2,8             | -5,5968      |
| FBgn0005671 | 153041_at                 | CG17369    | Vha55      | hydrogen-exporting ATPase activity, phosphorylating mechanism                                                                                                                                  | -                | -            | -1,9             | -5,7867      |
| FBgn0010019 | 152015_at                 | CG3972     | Cyp4g1     | electron transporter activity / oxidoreductase activity                                                                                                                                        | -                | -            | -2,1             | -5,6273      |
| FBgn0010357 | 143602_at                 | CG18211    | betaTry    | trypsin activity                                                                                                                                                                               | -                | -            | -4,6             | -24,1431     |
| FBgn0010359 | 143603_i_at               | CG30028    | gammaTry   | NOT serine-type endopeptidase activity / trypsin activity / trypsin activity                                                                                                                   | -3,5             | -7,577       | -100,0           | -23,6527     |
| FBgn0010387 | 143608_at                 | CG8627     | Dbi        | acyl-CoA binding / carrier activity / diazepam binding / enzyme inhibitor activity                                                                                                             | -                | -            | -1,7             | -6,0713      |
| FBgn0010423 | 143622_at                 | CG9073     | TpnC47D    | calcium ion binding / calmodulin binding                                                                                                                                                       | -1,5             | -3,2612      | -2,2             | -8,6538      |
| FBgn0010425 | 143624_at                 | CG18681    | epsilonTry | trypsin activity                                                                                                                                                                               | -2,8             | -6,0566      | -15,6            | -21,1352     |
| FBgn0011361 | 143658_at                 | CG9160     | mtacp1     | NADH dehydrogenase (ubiquinone) activity / NADH dehydrogenase activity                                                                                                                         | -                | -            | -1,5             | -3,9743      |
| FBgn0011555 | 143660_at                 | CG12385    | thetaTry   | trypsin activity                                                                                                                                                                               | -                | -            | -1,5             | -4,5503      |
| FBgn0011556 | 143661_at                 | CG12387    | betaTry    | NOT serine-type endopeptidase activity / trypsin activity | -                | -            | -2,5             | -4,8365      |
| FBgn0011591 | 143664_at                 | CG10580    | fng        | acetylglucosaminyltransferase activity / receptor binding / transferase activity, transferring glycosyl groups / UDP-glycosyltransferase activity                                              | -1,5             | -3,8557      | -1,9             | -4,6555      |
| FBgn0011603 | 153419_at                 | CG15444    | ine        | neurotransmittersodium symporter activity                                                                                                                                                      | -                | -            | -2,4             | -6,7081      |
| FBgn0011828 | 152747_at                 | CG12002    | Pxn        | peroxidase activity                                                                                                                                                                            | -                | -            | -1,7             | -6,8456      |
| FBgn0012034 | 153769_at                 | CG9390     | AcCoAS     | -                                                                                                                                                                                              | -                | -            | -1,9             | -6,4437      |
| FBgn0014141 | 141641_at                 | CG3937     | cher       | actin binding / structural constituent of cytoskeleton                                                                                                                                         | -2,1             | -8,0145      | -                | -            |
| FBgn0014343 | 143756_at                 | CG10601    | mirr       | protein binding / transcription factor activity / transcriptional activator activity                                                                                                           | -                | -            | -1,7             | -4,1197      |
| FBgn0014388 | 143757_at                 | CG1921     | sty        | receptor binding                                                                                                                                                                               | -1,6             | -3,0585      | -                | -            |
| FBgn0014455 | 153144_at                 | CG11654    | Ahcy13     | -                                                                                                                                                                                              | -                | -            | -1,5             | -4,7591      |

|             |             |         |              |                                                                                                                                                                           |      |         |       |          |
|-------------|-------------|---------|--------------|---------------------------------------------------------------------------------------------------------------------------------------------------------------------------|------|---------|-------|----------|
| FBgn0014863 | 143769_at   | CG1019  | Mlp84B       | protein binding                                                                                                                                                           | -    | -       | -1,8  | -7,226   |
| FBgn0014869 | 152504_at   | CG1721  | Pglym78      | phosphoglycerate mutase activity                                                                                                                                          | -    | -       | -1,8  | -9,1293  |
| FBgn0014877 | 153163_at   | CG6155  | Roe1         | unfolded protein binding                                                                                                                                                  | -    | -       | -1,8  | -4,8517  |
| FBgn0015245 | 141664_at   | CG12101 | Hsp60        | ATPase activity, coupled / unfolded protein binding                                                                                                                       | -    | -       | -1,8  | -6,9462  |
| FBgn0015316 | 143796_at   | CG9564  | Try29F       | peptidase activity / serine-type peptidase activity / trypsin activity                                                                                                    | -3,0 | -5,9168 | -2,6  | -3,3673  |
| FBgn0015766 | 155091_at   | CG10596 | Msr-110      | -                                                                                                                                                                         | -2,0 | -4,076  | -1,6  | -4,8614  |
| FBgn0015774 | 151503_at   | CG10521 | NetB         | structural molecule activity / structural molecule activity                                                                                                               | -    | -       | -1,5  | -3,212   |
| FBgn0015904 | 143855_at   | CG10571 | ara          | DNA binding / specific RNA polymerase II transcription factor activity / transcription factor activity / transcription regulator activity                                 | -1,6 | -4,2966 | -1,8  | -7,0689  |
| FBgn0016075 | 143868_at   | CG16858 | vkg          | extracellular matrix structural constituent                                                                                                                               | -1,9 | -4,9525 | -4,5  | -12,311  |
| FBgn0016694 | 153055_at   | CG17888 | Pdp1         | DNA binding / protein homodimerization activity / transcription factor activity                                                                                           | -1,5 | -3,4678 | -1,8  | -8,1595  |
| FBgn0016718 | 151805_at   | CG2194  | Reg-3        | -                                                                                                                                                                         | -    | -       | -1,7  | -4,8376  |
| FBgn0016724 | 151538_s_at | CG11064 | RfaBp        | fatty acid binding / heme binding / microtubule binding / retinoid binding / structural molecule activity                                                                 | -    | -       | -2,1  | -4,311   |
| FBgn0019643 | 152456_at   | CG3318  | Dat          | aralkylamine N-acetyltransferase activity / arylamine N-acetyltransferase activity / cocaine binding / dopamine transporter activity / dopamine:sodium symporter activity | -    | -       | -1,5  | -3,2529  |
| FBgn0019650 | 152583_at   | CG11186 | toy          | specific RNA polymerase II transcription factor activity                                                                                                                  | -1,8 | -3,6756 | -     | -        |
| FBgn0020235 | 143911_at   | CG7610  | ATPsyn-gamma | hydrogen-exporting ATPase activity, phosphorylative mechanism                                                                                                             | -    | -       | -1,5  | -4,8221  |
| FBgn0020307 | 143919_at   | CG5799  | dve          | AT DNA binding / transcription factor activity                                                                                                                            | -    | -       | -1,7  | -4,1258  |
| FBgn0020378 | 143922_at   | CG1343  | Sp1          | RNA polymerase II transcription factor activity                                                                                                                           | -2,4 | -3,9366 | -1,6  | -3,9632  |
| FBgn0020389 | 154327_at   | CG8363  | Paps         | nucleotide kinase activity                                                                                                                                                | -2,3 | -7,2436 | -3,1  | -12,2229 |
| FBgn0020414 | 152116_at   | CG4559  | ldgf3        | hydrolase activity, hydrolyzing N-glycosyl compounds / imaginal disc growth factor activity / NOT chitinase activity                                                      | -    | -       | -2,1  | -6,9089  |
| FBgn0020508 | 143929_at   | CG9540  | Aq5r2        | -                                                                                                                                                                         | -    | -       | -5,2  | -8,1216  |
| FBgn0020611 | 153422_at   | CG8048  | Vha44        | hydrogen-exporting ATPase activity, phosphorylative mechanism                                                                                                             | -    | -       | -1,7  | -5,9893  |
| FBgn0020637 | 143935_s_at | CG10534 | Lcp65Aq2     | structural constituent of larval cuticle (sensu Insecta) / structural constituent of larval cuticle (sensu Insecta)                                                       | -    | -       | -7,4  | -32,1918 |
| FBgn0020638 | 141314_at   | CG10530 | Lcp65Aq1     | structural constituent of larval cuticle (sensu Insecta) / structural constituent of larval cuticle (sensu Insecta)                                                       | -    | -       | -7,9  | -14,4544 |
| FBgn0020642 | 143938_at   | CG6956  | Lcp65Ac      | structural constituent of larval cuticle (sensu Insecta)                                                                                                                  | -2,0 | -5,3089 | -     | -        |
| FBgn0020653 | 154053_at   | CG2151  | Trxr-1       | antioxidant activity                                                                                                                                                      | -    | -       | -2,0  | -6,3777  |
| FBgn0020906 | 143944_at   | CG8867  | Jon25Bi      | elastase activity / pancreatic elastase activity / serine-type endopeptidase activity                                                                                     | -    | -       | -5,0  | -12,8958 |
| FBgn0020907 | 143945_at   | CG14904 | Scp2         | calcium ion binding / GTPase activity                                                                                                                                     | -    | -       | -1,6  | -6,9152  |
| FBgn0022341 | 143955_at   | CG33521 | -            | -                                                                                                                                                                         | -    | -       | -1,7  | -3,9386  |
| FBgn0022703 | 143961_at   | CG17682 | Chit1        | chitinase activity                                                                                                                                                        | -    | -       | -1,6  | -3,5522  |
| FBgn0023417 | 143985_at   | CG7807  | AP-2         | RNA polymerase II transcription factor activity / specific RNA polymerase II transcription factor activity                                                                | -    | -       | -1,7  | -3,5163  |
| FBgn0023496 | 143988_at   | CG7279  | Lip1         | lipase activity / triacylglycerol lipase activity                                                                                                                         | -    | -       | -1,6  | -3,1986  |
| FBgn0023537 | 153323_at   | CG17896 | -            | -                                                                                                                                                                         | -    | -       | -2,9  | -7,6408  |
| FBgn0024315 | 142681_at   | CG8098  | Picot        | high affinity inorganic phosphate:sodium symporter activity                                                                                                               | -    | -       | -5,1  | -10,9649 |
| FBgn0024361 | 144018_at   | CG11415 | Tsp2A        | -                                                                                                                                                                         | -    | -       | -1,6  | -4,4703  |
| FBgn0024978 | 153536_at   | CG2713  | -            | -                                                                                                                                                                         | -    | -       | -1,5  | -4,2554  |
| FBgn0024988 | 141607_at   | CG14801 | -            | exonuclease activity / exonuclease activity / nucleic acid binding                                                                                                        | -1,7 | -2,8639 | -     | -        |
| FBgn0026210 | 153275_at   | CG2520  | lap          | clathrin binding / phosphatidylinositol binding                                                                                                                           | -    | -       | -1,9  | -3,3564  |
| FBgn0026562 | 144147_at   | CG6378  | BM-40-SPARC  | -                                                                                                                                                                         | -1,8 | -6,4566 | -2,1  | -7,9451  |
| FBgn0026753 | 144156_at   | CG6213  | Vha13        | hydrogen-exporting ATPase activity, phosphorylative mechanism                                                                                                             | -    | -       | -1,7  | -4,8235  |
| FBgn0026761 | 155020_at   | CG3152  | Trap1        | -                                                                                                                                                                         | -    | -       | -1,5  | -5,0896  |
| FBgn0027107 | 144173_at   | CG17063 | inx6         | gap-junction forming channel activity / gap-junction forming channel activity / innexin channel activity / innexin channel activity                                       | -    | -       | -2,0  | -3,9164  |
| FBgn0027111 | 144176_at   | CG1221  | miple        | -                                                                                                                                                                         | -3,2 | -7,8076 | -2,1  | -6,0085  |
| FBgn0027348 | 153318_at   | CG4501  | bgm          | -                                                                                                                                                                         | -    | -       | -1,9  | -6,526   |
| FBgn0027527 | 144185_at   | CG1151  | Osi6         | -                                                                                                                                                                         | -2,2 | -7,1157 | -1,8  | -5,1113  |
| FBgn0027556 | 152286_at   | CG4928  | -            | -                                                                                                                                                                         | -1,9 | -2,8439 | -3,4  | -7,9154  |
| FBgn0027571 | 152126_at   | CG3523  | -            | fatty-acid synthase activity                                                                                                                                              | -    | -       | -4,3  | -10,7826 |
| FBgn0027573 | 152119_at   | CG5518  | sda          | -                                                                                                                                                                         | -    | -       | -2,7  | -4,7862  |
| FBgn0027580 | 152059_at   | CG1516  | -            | -                                                                                                                                                                         | -1,7 | -3,8917 | -2,1  | -5,6933  |
| FBgn0027594 | 151918_s_at | CG2086  | drpr         | extracellular matrix structural constituent / receptor activity                                                                                                           | -1,6 | -4,4208 | -     | -        |
| FBgn0027596 | 151915_at   | CG10249 | -            | -                                                                                                                                                                         | -    | -       | -1,5  | -3,7583  |
| FBgn0027844 | 152261_at   | CG7820  | CAH1         | carbonate dehydratase activity                                                                                                                                            | -2,7 | -4,1161 | -3,0  | -9,9222  |
| FBgn0027945 | 141370_at   | CG7758  | ppl          | hydrolase activity                                                                                                                                                        | -    | -       | -1,5  | -4,1047  |
| FBgn0028381 | 144201_at   | CG14902 | decay        | caspase activity                                                                                                                                                          | -    | -       | -1,9  | -3,5107  |
| FBgn0028491 | 151495_at   | CG2930  | -            | proton-dependent oligopeptide transporter activity                                                                                                                        | -1,6 | -3,7713 | -2,2  | -7,075   |
| FBgn0028510 | 144220_at   | CG15261 | -            | -                                                                                                                                                                         | -    | -       | -2,0  | -4,7313  |
| FBgn0028533 | 142950_at   | CG7953  | -            | -                                                                                                                                                                         | -    | -       | -1,5  | -6,6359  |
| FBgn0028536 | 144233_at   | CG15281 | -            | -                                                                                                                                                                         | -4,6 | -9,9917 | -10,0 | -11,0219 |
| FBgn0028544 | 153391_at   | CG16884 | -            | -                                                                                                                                                                         | -    | -       | -2,9  | -8,4397  |
| FBgn0028573 | 144238_at   | CG5700  | prc          | -                                                                                                                                                                         | -    | -       | -1,9  | -5,6333  |
| FBgn0028583 | 144239_at   | CG12794 | lcs          | -                                                                                                                                                                         | -    | -       | -1,6  | -4,8891  |
| FBgn0028789 | 144254_at   | CG5133  | Doc1         | transcription factor activity                                                                                                                                             | -    | -       | -     | -        |
| FBgn0028876 | 144283_at   | CG16876 | -            | -                                                                                                                                                                         | -1,5 | -3,1091 | -     | -        |
| FBgn0028905 | 144302_at   | CG32972 | -            | -                                                                                                                                                                         | -    | -       | -1,5  | -4,6595  |
| FBgn0028920 | 144310_at   | CG8997  | -            | -                                                                                                                                                                         | -2,4 | -9,2896 | -1,9  | -4,4317  |
| FBgn0029531 | 144348_at   | CG13362 | -            | -                                                                                                                                                                         | -    | -       | -1,6  | -5,2814  |
| FBgn0029620 | 142467_at   | CG7981  | -            | -                                                                                                                                                                         | -    | -       | -2,7  | -11,5692 |
| FBgn0029639 | 144419_at   | CG14419 | -            | -                                                                                                                                                                         | -    | -       | -2,1  | -6,385   |
| FBgn0029650 | 144430_at   | CG9399  | -            | -                                                                                                                                                                         | -1,5 | -3,2095 | -2,3  | -7,5571  |
| FBgn0029652 | 144432_at   | CG14265 | -            | -                                                                                                                                                                         | -    | -       | -1,7  | -4,909   |
| FBgn0029721 | 153790_at   | CG7010  | (1)G0334     | pyruvate dehydrogenase (acetyl-transferring) activity                                                                                                                     | -2,4 | -4,1318 | -2,6  | -11,5045 |
| FBgn0029804 | 144549_at   | CG3097  | -            | carboxypeptidase A activity                                                                                                                                               | -    | -       | -1,8  | -5,4722  |
| FBgn0029807 | 142938_at   | CG3108  | -            | metallocarboxypeptidase activity                                                                                                                                          | -1,9 | -6,2935 | -1,9  | -5,5123  |
| FBgn0029823 | 144561_at   | CG3011  | -            | glycine hydroxymethyltransferase activity                                                                                                                                 | -1,6 | -3,1342 | -1,8  | -4,2589  |
| FBgn0029854 | 144586_at   | CG3566  | -            | electron transporter activity                                                                                                                                             | -    | -       | -2,3  | -7,0808  |
| FBgn0029889 | 155145_at   | CG4094  | (1)G0255     | fumarate hydratase activity / fumarate hydratase activity                                                                                                                 | -    | -       | -1,5  | -3,1736  |
| FBgn0029969 | 154229_at   | CG10932 | -            | acetyl-CoA C-acetyltransferase activity                                                                                                                                   | -    | -       | -1,7  | -5,7347  |
| FBgn0029990 | 152816_at   | CG2232  | -            | -                                                                                                                                                                         | -    | -       | -1,6  | -3,4687  |
| FBgn0029994 | 144675_at   | CG2254  | -            | oxidoreductase activity                                                                                                                                                   | -    | -       | -4,7  | -8,5828  |
| FBgn0030040 | 144700_at   | CG15347 | -            | -                                                                                                                                                                         | -    | -       | -1,9  | -6,5915  |
| FBgn0030041 | 144701_at   | CG12116 | -            | sepiapterin reductase activity                                                                                                                                            | -    | -       | -2,2  | -9,048   |
| FBgn0030059 | 144712_at   | CG1787  | Hexo2        | beta-N-acetylhexosaminidase activity / hydrolase activity, hydrolyzing N-glycosyl compounds                                                                               | -    | -       | -2,8  | -6,0274  |
| FBgn0030138 | 141481_at   | CG32699 | -            | receptor activity                                                                                                                                                         | -    | -       | -1,9  | -4,3079  |
| FBgn0030183 | 152303_at   | CG15309 | -            | molecular_function_unknown                                                                                                                                                | -    | -       | -1,7  | -5,8333  |
| FBgn0030187 | 154819_at   | CG2961  | Ipod         | -                                                                                                                                                                         | -    | -       | -1,7  | -4,7525  |
| FBgn0030251 | 152332_at   | CG2145  | -            | serine-type peptidase activity                                                                                                                                            | -2,4 | -5,0215 | -     | -        |
| FBgn0030263 | 142756_at   | CG2076  | -            | -                                                                                                                                                                         | -    | -       | -1,8  | -4,1102  |
| FBgn0030309 | 153527_at   | CG1572  | -            | -                                                                                                                                                                         | -    | -       | -2,0  | -5,4854  |
| FBgn0030362 | 141568_at   | CG1803  | regucalcin   | -                                                                                                                                                                         | -    | -       | -1,5  | -3,3512  |
| FBgn0030394 | 144941_at   | CG2560  | -            | structural constituent of larval cuticle (sensu Insecta)                                                                                                                  | -    | -       | -2,1  | -6,8568  |
| FBgn0030465 | 144996_at   | CG15743 | -            | nucleotide phosphatase activity                                                                                                                                           | -    | -       | -2,1  | -7,5504  |
| FBgn0030472 | 153359_at   | CG1633  | Jafrac1      | antioxidant activity / peroxidase activity / thioredoxin peroxidase activity                                                                                              | -    | -       | -1,6  | -4,7213  |
| FBgn0030478 | 141639_at   | CG1640  | -            | -                                                                                                                                                                         | -    | -       | -5,0  | -12,9174 |
| FBgn0030481 | 152076_at   | CG1662  | -            | receptor signaling protein activity                                                                                                                                       | -    | -       | -1,8  | -5,1358  |
| FBgn0030537 | 145043_at   | CG12480 | -            | -                                                                                                                                                                         | -1,9 | -3,7377 | -1,7  | -4,3723  |
| FBgn0030539 | 153732_at   | CG1368  | -            | structural constituent of chorion (sensu Insecta)                                                                                                                         | -    | -       | -4,5  | -17,0462 |
| FBgn0030541 | 145047_at   | CG11584 | -            | molecular_function_unknown                                                                                                                                                | -1,7 | -2,9418 | -12,4 | -16,5731 |
| FBgn0030569 | 155122_at   | CG9411  | -            | -                                                                                                                                                                         | -3,0 | -4,2598 | -1,7  | -24,9284 |
| FBgn0030593 | 152393_at   | CG9512  | -            | choline dehydrogenase activity                                                                                                                                            | -    | -       | -2,6  | -4,5488  |
| FBgn0030650 | 141692_at   | CG32206 | (1)G0168     | -                                                                                                                                                                         | -1,6 | -3,7621 | -2,0  | -3,4288  |
| FBgn0030653 | 153970_at   | CG7860  | -            | asparaginase activity                                                                                                                                                     | -    | -       | -1,8  | -7,8631  |
| FBgn0030737 | 145178_at   | CG9914  | -            | oxidoreductase activity / structural molecule activity                                                                                                                    | -    | -       | -1,5  | -6,462   |
| FBgn0030775 | 145202_at   | CG9673  | -            | NOT serine-type endopeptidase activity                                                                                                                                    | -    | -       | -1,5  | -3,7204  |
| FBgn0030821 | 145230_at   | CG5010  | -            | -                                                                                                                                                                         | -    | -       | -2,5  | -4,5959  |
| FBgn0030825 | 155011_at   | CG32563 | -            | -                                                                                                                                                                         | -    | -       | -1,5  | -4,5602  |
| FBgn0030837 | 145243_at   | CG8661  | -            | -                                                                                                                                                                         | -2,7 | -7,5807 | -16,4 | -21,9345 |
| FBgn0030882 | 145269_at   | CG6835  | GS           | catalytic activity / glutathione synthase activity / ligase activity                                                                                                      | -1,6 | -4,0629 | -1,7  | -3,6098  |
| FBgn0030887 | 145273_at   | CG6867  | -            | extracellular matrix structural constituent / structural molecule activity                                                                                                | -    | -       | -1,5  | -6,7699  |
| FBgn0030980 | 145340_at   | CG7406  | -            | -                                                                                                                                                                         | -    | -       | -2,1  | -2,9531  |
| FBgn0031000 | 145357_at   | CG7876  | -            | -                                                                                                                                                                         | -    | -       | -2,1  | -5,0583  |
| FBgn0031021 | 145368_at   | CG12203 | -            | NADH dehydrogenase (ubiquinone) activity / NADH dehydrogenase activity / oxidoreductase activity                                                                          | -    | -       | -1,5  | -4,456   |
| FBgn0031141 | 145450_at   | CG1304  | -            | serine-type endopeptidase activity                                                                                                                                        | -    | -       | -2,3  | -3,2408  |
|             |             |         |              |                                                                                                                                                                           | -    | -       | -2,3  | -5,4907  |



|             |                       |         |            |                                                                                                                   |       |          |        |          |
|-------------|-----------------------|---------|------------|-------------------------------------------------------------------------------------------------------------------|-------|----------|--------|----------|
| FBgn0031249 | 141435_at             | CG11911 | -          | chymotrypsin activity / serine-type endopeptidase activity                                                        | -     | -        | -6,2   | -12,2726 |
| FBgn0031277 | 145547_r_at           | CG13947 | -          | -                                                                                                                 | -     | -        | -2,2   | -6,5392  |
| FBgn0031294 | 153019_at             | CG13795 | ia2        | protein tyrosine phosphatase activity / transmembrane receptor protein tyrosine phosphatase activity              | -     | -        | -1,6   | -3,6296  |
| FBgn0031380 | 152801_at             | CG4233  | Got2       | aspartate transaminase activity                                                                                   | -     | -        | -2,8   | -8,6607  |
| FBgn0031433 | 145648_at             | CG18559 | Cyp309a2   | electron transporter activity / electron transporter activity / oxidoreductase activity / oxidoreductase activity | -     | -        | -4,1   | -9,2889  |
| FBgn0031561 | 145731_at             | CG16712 | -          | serine-type endopeptidase inhibitor activity                                                                      | -1,9  | -6,0082  | -3,9   | -9,5336  |
| FBgn0031579 | 145743_at             | CG15422 | -          | -                                                                                                                 | -     | -        | -1,8   | -3,2248  |
| FBgn0031629 | 145779_at             | CG3244  | -          | -                                                                                                                 | -     | -        | -2,2   | -7,107   |
| FBgn0031653 | 145795_at             | CG8871  | Jon25Biii  | elastase activity / serine-type peptidase activity                                                                | -9,9  | -9,5356  | -58,8  | -32,0902 |
| FBgn0031654 | 145796_at             | CG8869  | Jon25Bii   | chymotrypsin activity / serine-type endopeptidase activity                                                        | -     | -        | -33,8  | -20,3352 |
| FBgn0031688 | 145813_at             | CG6081  | Cyp28d2    | electron transporter activity / oxidoreductase activity                                                           | -3,8  | -5,1926  | -5,2   | -8,0957  |
| FBgn0031702 | 152614_at             | CG14021 | -          | -                                                                                                                 | -     | -        | -2,2   | -6,5411  |
| FBgn0031737 | 151477_at             | CG11142 | -          | structural constituent of peritrophic membrane (sensu Insecta)                                                    | -     | -        | -2,7   | -8,9442  |
| FBgn0031816 | 145900_at             | CG16947 | -          | -                                                                                                                 | -     | -        | -1,7   | -4,2949  |
| FBgn0031839 | 145915_at             | CG13634 | Oatp26F    | organic anion transporter activity                                                                                | -1,6  | -5,1832  | -      | -        |
| FBgn0031908 | 153932_at             | CG5177  | -          | trehalose-phosphatase activity                                                                                    | -     | -        | -1,7   | -5,2282  |
| FBgn0031914 | 153381_at             | CG5973  | -          | carrier activity / retinal binding                                                                                | -     | -        | -1,5   | -3,7957  |
| FBgn0031936 | 145974_at             | CG13794 | -          | -                                                                                                                 | -6,2  | -10,4479 | -3,0   | -8,4854  |
| FBgn0031937 | 145975_at             | CG13795 | -          | amino acid transporter activity / transporter activity                                                            | -1,6  | -3,771   | -      | -        |
| FBgn0031938 | 145976_s_at           | CG13796 | -          | glycine transporter activity / structural constituent of adult cuticle (sensu Insecta)                            | -     | -        | -1,5   | -3,3866  |
| FBgn0031939 | 145977_at             | CG13796 | -          | glycine transporter activity / structural constituent of adult cuticle (sensu Insecta)                            | -     | -        | -1,6   | -2,7962  |
| FBgn0031948 | 152382_at             | CG7149  | -          | -                                                                                                                 | -     | -        | -1,8   | -5,1844  |
| FBgn0032021 | 146021_at             | CG7781  | -          | -                                                                                                                 | -     | -        | -1,6   | -4,1508  |
| FBgn0032068 | 142147_at             | CG9466  | -          | alpha-mannosidase activity / hydrolase activity, hydrolyzing N-glycosyl compounds                                 | -     | -        | -2,5   | -7,2059  |
| FBgn0032069 | 146050_at             | CG9468  | -          | alpha-mannosidase activity / hydrolase activity, hydrolyzing N-glycosyl compounds                                 | -2,2  | -3,7299  | -6,1   | -8,4254  |
| FBgn0032075 | 146053_at             | CG9496  | Tsp29Fb    | -                                                                                                                 | -     | -        | -2,0   | -4,4092  |
| FBgn0032076 | 141703_at             | CG9510  | -          | argininosuccinate lyase activity                                                                                  | -     | -        | -1,5   | -3,3152  |
| FBgn0032088 | 146061_at             | CG13102 | -          | -                                                                                                                 | -     | -        | -2,0   | -6,1659  |
| FBgn0032114 | 146084_at             | CG3752  | Aldh       | aldehyde dehydrogenase (NAD) activity                                                                             | -     | -        | -7,4   | -16,8193 |
| FBgn0032136 | 153828_at             | CG15828 | -          | lipid binding                                                                                                     | -     | -        | -1,7   | -5,6375  |
| FBgn0032144 | 146103_at             | CG17633 | -          | carboxypeptidase A activity                                                                                       | -     | -        | -3,8   | -9,3587  |
| FBgn0032152 | 141255_at             | CG4535  | FKBP59     | FK506 binding / peptidyl-prolyl cis-trans isomerase activity                                                      | -     | -        | -1,6   | -3,9093  |
| FBgn0032167 | 141658_at             | CG5853  | -          | anion channel activity / ATPase activity, coupled to transmembrane movement of substances / transporter activity  | -     | -        | -2,2   | -7,7669  |
| FBgn0032177 | 146118_at             | CG33301 | -          | molecular_function unknown / structural constituent of cuticle (sensu Insecta)                                    | -     | -        | -1,6   | -5,2094  |
| FBgn0032192 | 146129_at             | CG5731  | -          | -                                                                                                                 | -2,1  | -5,4013  | -2,0   | -4,2497  |
| FBgn0032237 | 146151_at             | CG5362  | -          | L-malate dehydrogenase activity                                                                                   | -     | -        | -1,6   | -5,5648  |
| FBgn0032264 | 146165_at             | CG6113  | -          | triacylglycerol lipase activity                                                                                   | -     | -        | -1,5   | -4,5853  |
| FBgn0032282 | 146181_at             | CG7299  | -          | -                                                                                                                 | -7,2  | -8,7595  | -22,4  | -18,3639 |
| FBgn0032287 | 151967_at             | CG6415  | -          | -                                                                                                                 | -     | -        | -1,9   | -5,8467  |
| FBgn0032304 | 146197_at             | CG17134 | -          | cathepsin D activity                                                                                              | -     | -        | -3,2   | -6,3881  |
| FBgn0032373 | 146249_at             | CG12602 | -          | hydrogen-exporting ATPase activity, phosphorylative mechanism                                                     | -     | -        | -2,4   | -6,5694  |
| FBgn0032396 | 151733_at             | CG5304  | I(2)01810  | transporter activity                                                                                              | -     | -        | -2,0   | -5,2867  |
| FBgn0032405 | 146269_at             | CG14946 | -          | oxidoreductase activity                                                                                           | -     | -        | -2,7   | -8,336   |
| FBgn0032463 | 146305_at             | CG3762  | Vha68-2    | hydrogen-exporting ATPase activity, phosphorylative mechanism                                                     | -     | -        | -1,8   | -5,5828  |
| FBgn0032511 | 142243_at             | CG9306  | -          | NADH dehydrogenase (ubiquinone) activity / NADH dehydrogenase activity                                            | -     | -        | -1,5   | -2,8394  |
| FBgn0032537 | 146350_s_at           | CG16885 | -          | -                                                                                                                 | -     | -        | -2,7   | -13,3271 |
| FBgn0032606 | 146379_at             | CG17932 | Ugt36Bc    | glucuronosyltransferase activity                                                                                  | -     | -        | -1,8   | -4,3141  |
| FBgn0032679 | 141807_at             | CG10302 | bsf        | mRNA 3'-UTR binding / oxidoreductase activity                                                                     | -     | -        | -1,6   | -3,0186  |
| FBgn0032693 | 155069_at             | CG10391 | Cyp310a1   | electron transporter activity / oxidoreductase activity                                                           | -     | -        | -1,6   | -5,174   |
| FBgn0032721 | 154383_at             | CG10602 | -          | metallopeptidase activity                                                                                         | -     | -        | -2,2   | -6,1359  |
| FBgn0032773 | 153365_at             | CG15825 | -          | -                                                                                                                 | -1,6  | -3,7069  | -3,1   | -7,2637  |
| FBgn0032803 | 146500_at             | CG13082 | -          | -                                                                                                                 | -     | -        | -2,4   | -7,0825  |
| FBgn0032806 | 146503_at             | CG10363 | TeplV      | protease inhibitor activity                                                                                       | -     | -        | -1,7   | -5,3094  |
| FBgn0032844 | 146532_at             | CG10746 | fok        | -                                                                                                                 | -2,2  | -7,4202  | -2,1   | -6,6095  |
| FBgn0032899 | 152155_at             | CG9338  | -          | -                                                                                                                 | -1,6  | -4,065   | -2,6   | -10,6606 |
| FBgn0032946 | 146586_at             | CG8663  | nrv3       | -                                                                                                                 | -     | -        | -2,2   | -5,0678  |
| FBgn0032993 | 141373_at             | CG18117 | -          | -                                                                                                                 | -     | -        | -1,7   | -4,1936  |
| FBgn0033093 | 151882_at             | CG3270  | -          | oxidoreductase activity                                                                                           | -     | -        | -1,8   | -4,3555  |
| FBgn0033173 | 146742_at             | CG30502 | -          | -                                                                                                                 | -     | -        | -1,6   | -4,2782  |
| FBgn0033183 | 146745_at             | CG1620  | -          | -                                                                                                                 | -     | -        | -1,7   | -3,0673  |
| FBgn0033205 | 141701_at             | CG2064  | -          | oxidoreductase activity                                                                                           | -2,4  | -5,0762  | -1,6   | -4,3174  |
| FBgn0033221 | 146767_at             | CG12825 | -          | -                                                                                                                 | -     | -        | -1,9   | -3,8803  |
| FBgn0033245 | 152407_at             | CG11198 | -          | -                                                                                                                 | -     | -        | -1,6   | -4,6551  |
| FBgn0033268 | 146792_at             | CG2297  | Obp44a     | -                                                                                                                 | -     | -        | -3,4   | -10,5569 |
| FBgn0033271 | 152726_at             | CG8708  | -          | transferase activity / transferase activity, transferring glycosyl groups                                         | -     | -        | -1,6   | -3,257   |
| FBgn0033275 | 146794_at             | CG14756 | -          | -                                                                                                                 | -12,8 | -16,1154 | -100,0 | -47,2649 |
| FBgn0033319 | 146826_at             | CG8579  | Jon4E      | chymotrypsin activity                                                                                             | -1,6  | -3,5671  | -10,6  | -13,4573 |
| FBgn0033359 | 155018_at             | CG8213  | -          | serine-type endopeptidase activity / trypsin activity                                                             | -     | -        | -1,6   | -4,4352  |
| FBgn0033367 | 142220_at             | CG8193  | -          | monophenol monooxygenase activity                                                                                 | -2,0  | -6,9155  | -2,4   | -10,9751 |
| FBgn0033423 | 151956_at             | CG1809  | -          | alkaline phosphatase activity / nucleotide phosphatase activity                                                   | -     | -        | -2,7   | -7,6072  |
| FBgn0033446 | 152817_at             | CG1648  | -          | -                                                                                                                 | -     | -        | -1,5   | -6,0634  |
| FBgn0033448 | 142262_at             | CG1623  | -          | -                                                                                                                 | -     | -        | -1,5   | -3,923   |
| FBgn0033509 | 154737_at             | CG12908 | Ndg        | structural molecule activity                                                                                      | -1,8  | -4,2423  | -1,5   | -5,1768  |
| FBgn0033541 | 146958_at             | CG12934 | -          | -                                                                                                                 | -2,3  | -5,0302  | -6,2   | -12,7578 |
| FBgn0033590 | 146988_at             | CG13217 | -          | -                                                                                                                 | -2,1  | -4,5418  | -1,5   | -3,282   |
| FBgn0033604 | 147002_at             | CG9070  | -          | -                                                                                                                 | -     | -        | -9,5   | -20,7797 |
| FBgn0033613 | 147009_at             | CG13211 | -          | -                                                                                                                 | -     | -        | -2,0   | -4,1983  |
| FBgn0033634 | 147022_at             | CG7763  | -          | -                                                                                                                 | -2,5  | -4,2105  | -1,9   | -5,6294  |
| FBgn0033643 | 147026_s_at           | CG30095 | -          | fructose transporter activity / glucose transporter activity / glucose transporter activity                       | -2,1  | -7,5196  | -      | -        |
| FBgn0033717 | 153538_at             | CG8839  | -          | fatty acid amide hydrolase activity                                                                               | -     | -        | -1,6   | -3,9764  |
| FBgn0033721 | 147084_at             | CG13159 | -          | -                                                                                                                 | -8,8  | -15,5485 | -11,7  | -19,612  |
| FBgn0033724 | 153425_at             | CG8501  | -          | -                                                                                                                 | -     | -        | -2,0   | -6,5553  |
| FBgn0033726 | 147087_at             | CG8836  | -          | structural constituent of larval cuticle (sensu Insecta)                                                          | -     | -        | -3,2   | -4,1423  |
| FBgn0033765 | 152880_at             | CG8772  | nemy       | glutaminase activity                                                                                              | -     | -        | -1,8   | -3,6384  |
| FBgn0033779 | 142416_at             | CG3814  | -          | N-methyl-D-aspartate selective glutamate receptor activity                                                        | -1,6  | -3,333   | -2,0   | -5,8007  |
| FBgn0033787 | 147125_at             | CG13321 | -          | -                                                                                                                 | -1,6  | -4,6328  | -3,1   | -8,9716  |
| FBgn0033788 | 147126_i_at           | CG13323 | -          | -                                                                                                                 | -     | -        | -2,8   | -5,6702  |
| FBgn0033878 | 142709_s_at           | CG6543  | -          | oxidoreductase activity                                                                                           | -     | -        | -2,0   | -6,2334  |
| FBgn0033913 | 151760_at / 143046_at | CG8468  | -          | monocarboxylate porter activity                                                                                   | -1,7  | -2,8438  | -1,5   | -4,649   |
| FBgn0033968 | 141323_at             | CG10200 | -          | -                                                                                                                 | -     | -        | -1,6   | -4,1015  |
| FBgn0034010 | 147242_at             | CG8157  | -          | -                                                                                                                 | -2,5  | -6,4989  | -8,7   | -11,4505 |
| FBgn0034011 | 147243_at             | CG8160  | -          | -                                                                                                                 | -     | -        | -1,8   | -4,9853  |
| FBgn0034034 | 142370_at             | CG8205  | fus        | RNA binding                                                                                                       | -     | -        | -1,6   | -3,3956  |
| FBgn0034044 | 147264_at             | CG12969 | tum        | actin binding / structural constituent of cytoskeleton                                                            | -     | -        | -1,5   | -4,8793  |
| FBgn0034048 | 152312_at             | CG8256  | I(2)k05713 | glycerol-3-phosphate dehydrogenase activity                                                                       | -     | -        | -2,1   | -5,4681  |
| FBgn0034108 | 155081_at             | CG3767  | Jhl-26     | -                                                                                                                 | -2,3  | -5,013   | -1,9   | -7,1166  |
| FBgn0034201 | 147355_at             | CG17290 | -          | -                                                                                                                 | -     | -        | -7,3   | -7,9886  |
| FBgn0034203 | 147357_at             | CG30457 | -          | -                                                                                                                 | -     | -        | -3,0   | -5,5798  |
| FBgn0034204 | 147358_at             | CG10953 | -          | -                                                                                                                 | -     | -        | -2,1   | -6,325   |
| FBgn0034259 | 154495_at             | CG6459  | -          | -                                                                                                                 | -     | -        | -2,0   | -7,1972  |
| FBgn0034288 | 147405_at             | CG5084  | -          | -                                                                                                                 | -     | -        | -5,7   | -9,8853  |
| FBgn0034289 | 147406_at             | CG10910 | -          | -                                                                                                                 | -     | -        | -7,0   | -4,9793  |
| FBgn0034292 | 147407_at             | CG5767  | -          | -                                                                                                                 | -     | -        | -3,2   | -7,3802  |
| FBgn0034294 | 147409_at             | CG5765  | -          | -                                                                                                                 | -1,8  | -4,8159  | -6,0   | -18,3062 |
| FBgn0034295 | 147410_at             | CG10911 | -          | -                                                                                                                 | -     | -        | -2,1   | -5,796   |
| FBgn0034318 | 147422_at             | CG14500 | -          | -                                                                                                                 | -     | -        | -1,8   | -3,5902  |
| FBgn0034364 | 147450_at             | CG5493  | -          | -                                                                                                                 | -1,7  | -5,8467  | -      | -        |
| FBgn0034365 | 153187_at             | CG5335  | -          | protein transporter activity                                                                                      | -     | -        | -2,4   | -6,5707  |
| FBgn0034390 | 152083_at             | CG15093 | -          | -                                                                                                                 | -3,8  | -6,3497  | -22,7  | -17,8495 |
| FBgn0034394 | 153069_at             | CG15096 | -          | high affinity inorganic phosphate:sodium symporter activity                                                       | -     | -        | -1,9   | -8,424   |
| FBgn0034395 | 155162_at             | CG15081 | I(2)03709  | -                                                                                                                 | -     | -        | -1,6   | -5,4739  |

|             |                           |         |           |                                                                                                                                                                                                                                                                                                                                   |      |          |       |          |
|-------------|---------------------------|---------|-----------|-----------------------------------------------------------------------------------------------------------------------------------------------------------------------------------------------------------------------------------------------------------------------------------------------------------------------------------|------|----------|-------|----------|
| FBgn0034406 | 154747_at                 | CG15106 | Jheh3     | epoxide hydrolase activity / juvenile hormone epoxide hydrolase activity                                                                                                                                                                                                                                                          | -    | -        | -1,6  | -3,7982  |
| FBgn0034428 | 147486_i_at               | CG18606 | -         | -                                                                                                                                                                                                                                                                                                                                 | -    | -        | -1,8  | -2,9753  |
| FBgn0034475 | 147521_at                 | CG13874 | Obp56h    | odorant binding                                                                                                                                                                                                                                                                                                                   | -    | -        | -1,5  | -5,107   |
| FBgn0034501 | 141541_at                 | CG13868 | -         | -                                                                                                                                                                                                                                                                                                                                 | -    | -        | -1,7  | -3,76    |
| FBgn0034564 | 147588_at                 | CG9344  | -         | pre-mRNA splicing factor activity                                                                                                                                                                                                                                                                                                 | -    | -        | -1,6  | -3,1899  |
| FBgn0034583 | 155148_at                 | CG10527 | -         | farnesoic acid O-methyltransferase activity                                                                                                                                                                                                                                                                                       | -    | -        | -2,5  | -9,4385  |
| FBgn0034584 | 152512_at                 | CG9364  | Treh      | -                                                                                                                                                                                                                                                                                                                                 | -    | -        | -1,5  | -4,1506  |
| FBgn0034602 | 152886_at                 | CG15658 | -         | -                                                                                                                                                                                                                                                                                                                                 | -    | -        | -1,7  | -4,1315  |
| FBgn0034698 | 141793_at                 | CG6698  | NTR       | -                                                                                                                                                                                                                                                                                                                                 | -    | -        | -2,2  | -6,2329  |
| FBgn0034712 | 147666_at                 | CG3264  | -         | alkaline phosphatase activity / nucleotide phosphatase activity                                                                                                                                                                                                                                                                   | -1,8 | -3,9511  | -2,8  | -7,9348  |
| FBgn0034819 | 147740_at                 | CG9877  | -         | -                                                                                                                                                                                                                                                                                                                                 | -    | -        | -2,1  | -7,32    |
| FBgn0034885 | 147793_at                 | CG4019  | -         | carrier activity / water channel activity                                                                                                                                                                                                                                                                                         | -    | -        | -2,7  | -9,273   |
| FBgn0034900 | 147802_at                 | CG12491 | -         | -                                                                                                                                                                                                                                                                                                                                 | -    | -        | -16,4 | -16,6263 |
| FBgn0034901 | 142461_at                 | CG11300 | -         | -                                                                                                                                                                                                                                                                                                                                 | -1,5 | -4,2737  | -3,1  | -8,9391  |
| FBgn0034952 | 152806_at                 | CG33519 | -         | protein serine/threonine kinase activity / structural constituent of cytoskeleton                                                                                                                                                                                                                                                 | -    | -        | -1,8  | -4,7387  |
| FBgn0035030 | 152422_at                 | CG3541  | -         | -                                                                                                                                                                                                                                                                                                                                 | -    | -        | -1,6  | -6,0838  |
| FBgn0035077 | 154985_at                 | CG9083  | -         | -                                                                                                                                                                                                                                                                                                                                 | -8,5 | -13,8321 | -     | -        |
| FBgn0035095 | 147907_at                 | CG32475 | mthl8     | G-protein coupled receptor activity                                                                                                                                                                                                                                                                                               | -2,8 | -3,0102  | -2,5  | -4,2689  |
| FBgn0035154 | 152830_at                 | CG3344  | -         | carboxypeptidase C activity / serine carboxypeptidase activity                                                                                                                                                                                                                                                                    | -    | -        | -1,6  | -3,9571  |
| FBgn0035190 | 147960_at                 | CG13913 | -         | -                                                                                                                                                                                                                                                                                                                                 | -    | -        | -     | -        |
| FBgn0035281 | 148008_at                 | CG1919  | -         | structural constituent of cuticle (sensu Insecta)                                                                                                                                                                                                                                                                                 | -4,8 | -10,3083 | -     | -        |
| FBgn0035289 | 141428_at                 | CG12026 | -         | -                                                                                                                                                                                                                                                                                                                                 | -3,4 | -5,4757  | -     | -        |
| FBgn0035326 | 141439_at                 | CG32302 | -         | -                                                                                                                                                                                                                                                                                                                                 | -    | -        | -1,5  | -3,7735  |
| FBgn0035482 | 148137_at                 | CG14985 | -         | -                                                                                                                                                                                                                                                                                                                                 | -    | -        | -3,9  | -8,3249  |
| FBgn0035495 | 152055_at                 | CG14989 | -         | -                                                                                                                                                                                                                                                                                                                                 | -2,5 | -5,2147  | -1,6  | -4,3785  |
| FBgn0035544 | 148175_at                 | CG15021 | -         | -                                                                                                                                                                                                                                                                                                                                 | -    | -        | -1,6  | -4,6802  |
| FBgn0035545 | 148176_at                 | CG12607 | -         | -                                                                                                                                                                                                                                                                                                                                 | -1,7 | -5,055   | -     | -        |
| FBgn0035548 | 148179_at                 | CG15023 | -         | -                                                                                                                                                                                                                                                                                                                                 | -1,5 | -4,1417  | -1,5  | -5,938   |
| FBgn0035551 | 148182_at                 | CG7465  | -         | -                                                                                                                                                                                                                                                                                                                                 | -    | -        | -3,0  | -5,8852  |
| FBgn0035552 | 148183_at                 | CG11350 | -         | -                                                                                                                                                                                                                                                                                                                                 | -2,1 | -8,4916  | -33,8 | -38,4279 |
| FBgn0035558 | 151577_at                 | CG11357 | -         | transferase activity, transferring glycosyl groups / UDP-galactose beta-N-acetylglucosamine beta-1,3-galactosyltransferase activity                                                                                                                                                                                               | -    | -        | -7,0  | -8,6022  |
| FBgn0035579 | 148202_at                 | CG32237 | -         | -                                                                                                                                                                                                                                                                                                                                 | -1,8 | -2,9083  | -2,9  | -4,692   |
| FBgn0035580 | 148203_at                 | CG32237 | -         | -                                                                                                                                                                                                                                                                                                                                 | -3,4 | -5,1627  | -     | -        |
| FBgn0035582 | 148205_at                 | CG13705 | -         | -                                                                                                                                                                                                                                                                                                                                 | -3,9 | -10,2694 | -2,4  | -4,6759  |
| FBgn0035583 | 148206_at                 | CG13704 | -         | -                                                                                                                                                                                                                                                                                                                                 | -1,7 | -5,5497  | -3,7  | -17,3333 |
| FBgn0035588 | 141484_at                 | CG10672 | -         | oxidoreductase activity, acting on CH-OH group of donors                                                                                                                                                                                                                                                                          | -    | -        | -1,6  | -3,1565  |
| FBgn0035608 | 148223_at                 | CG10630 | -         | -                                                                                                                                                                                                                                                                                                                                 | -    | -        | -1,9  | -3,4536  |
| FBgn0035612 | 154869_at                 | CG10625 | -         | -                                                                                                                                                                                                                                                                                                                                 | -1,7 | -2,9602  | -2,0  | -4,6957  |
| FBgn0035619 | 148228_at                 | CG10592 | -         | alkaline phosphatase activity / nucleotide phosphatase activity                                                                                                                                                                                                                                                                   | -    | -        | -2,9  | -9,0722  |
| FBgn0035620 | 151980_at                 | CG5150  | -         | alkaline phosphatase activity / nucleotide phosphatase activity                                                                                                                                                                                                                                                                   | -    | -        | -2,4  | -5,7344  |
| FBgn0035662 | 152176_at                 | CG6457  | yip7      | chymotrypsin activity / serine-type endopeptidase activity                                                                                                                                                                                                                                                                        | -    | -        | -2,2  | -6,3451  |
| FBgn0035664 | 148253_at                 | CG6467  | Jon6SAiv  | chymotrypsin activity / serine-type endopeptidase activity                                                                                                                                                                                                                                                                        | -2,3 | -7,0935  | -34,7 | -23,3608 |
| FBgn0035665 | 151793_at                 | CG6483  | Jon6SAiii | elastase activity / serine-type endopeptidase activity                                                                                                                                                                                                                                                                            | -2,0 | -2,974   | -5,1  | -13,0282 |
| FBgn0035667 | 148255_at                 | CG10475 | Jon6SAi   | serine-type endopeptidase activity                                                                                                                                                                                                                                                                                                | -    | -        | -3,8  | -13,0152 |
| FBgn0035670 | 152006_at                 | CG10472 | -         | serine-type endopeptidase activity                                                                                                                                                                                                                                                                                                | -    | -        | -3,1  | -8,4391  |
| FBgn0035717 | 152709_at                 | CG10078 | Prat2     | -                                                                                                                                                                                                                                                                                                                                 | -    | -        | -2,4  | -6,1853  |
| FBgn0035742 | 148307_i_at / 148308_f_at | CG8629  | -         | acyl-CoA binding / carrier activity / diazepam binding / enzyme inhibitor activity                                                                                                                                                                                                                                                | -2,5 | -6,3069  | -2,9  | -8,8737  |
| FBgn0035744 | 148310_i_at               | CG8628  | -         | acyl-CoA binding / carrier activity / diazepam binding / enzyme inhibitor activity                                                                                                                                                                                                                                                | -    | -        | -13,4 | -12,9795 |
| FBgn0035770 | 153088_at                 | CG8588  | pst       | -                                                                                                                                                                                                                                                                                                                                 | -    | -        | -1,7  | -3,1342  |
| FBgn0035779 | 148332_at                 | CG8562  | -         | metallocarboxypeptidase activity                                                                                                                                                                                                                                                                                                  | -3,4 | -6,8414  | -6,1  | -11,765  |
| FBgn0035781 | 152794_at                 | CG8560  | -         | NOT carboxypeptidase activity                                                                                                                                                                                                                                                                                                     | -    | -        | -2,6  | -6,5433  |
| FBgn0035858 | 148382_f_at               | CG13674 | -         | -                                                                                                                                                                                                                                                                                                                                 | -    | -        | -1,9  | -5,4698  |
| FBgn0035859 | 148384_f_at               | CG13678 | -         | -                                                                                                                                                                                                                                                                                                                                 | -    | -        | -1,6  | -5,315   |
| FBgn0035904 | 148410_at                 | CG6776  | -         | glutathione transferase activity                                                                                                                                                                                                                                                                                                  | -    | -        | -2,4  | -5,3763  |
| FBgn0035917 | 152762_at                 | CG6416  | -         | -                                                                                                                                                                                                                                                                                                                                 | -    | -        | -4,5  | -7,4994  |
| FBgn0035926 | 148422_at                 | CG5804  | -         | acyl-CoA binding / carrier activity / diazepam binding / enzyme inhibitor activity                                                                                                                                                                                                                                                | -1,9 | -5,2182  | -8,1  | -13,0988 |
| FBgn0035929 | 148424_at                 | CG13311 | -         | structural molecule activity                                                                                                                                                                                                                                                                                                      | -    | -        | -1,5  | -3,3118  |
| FBgn0035956 | 148441_at                 | CG5187  | Doc2      | transcription factor activity                                                                                                                                                                                                                                                                                                     | -1,8 | -3,4897  | -     | -        |
| FBgn0035963 | 148446_at                 | CG4821  | Tequila   | pancreatic elastase activity / serine-type endopeptidase activity / trypsin activity                                                                                                                                                                                                                                              | -    | -        | -1,7  | -5,3795  |
| FBgn0035999 | 148467_at                 | CG3552  | -         | -                                                                                                                                                                                                                                                                                                                                 | -2,5 | -6,1793  | -2,7  | -8,1378  |
| FBgn0036024 | 141418_at                 | CG18180 | -         | chymotrypsin activity                                                                                                                                                                                                                                                                                                             | -    | -        | -14,0 | -14,2728 |
| FBgn0036041 | 148488_at                 | CG32046 | -         | -                                                                                                                                                                                                                                                                                                                                 | -    | -        | -1,5  | -3,5697  |
| FBgn0036074 | 148513_at                 | CG6611  | ect       | -                                                                                                                                                                                                                                                                                                                                 | -    | -        | -1,6  | -4,6876  |
| FBgn0036131 | 148554_at                 | CG12522 | -         | -                                                                                                                                                                                                                                                                                                                                 | -    | -        | -2,1  | -7,6438  |
| FBgn0036144 | 154200_at                 | CG6207  | GlcAT-P   | asialoorosomucoid beta-1,3-glucuronosyltransferase activity / galactosyl beta-1,3 N-acetylgalactosamine beta-1,3-glucuronosyltransferase activity / galactosylgalactosylxylosylprotein 3-beta-glucuronosyltransferase activity / glucuronosyltransferase activity / N-acetyllactosamine beta-1,3-glucuronosyltransferase activity | -    | -        | -2,3  | -4,5328  |
| FBgn0036167 | 148580_f_at               | CG33272 | -         | -                                                                                                                                                                                                                                                                                                                                 | -2,8 | -4,646   | -1,7  | -3,4401  |
| FBgn0036182 | 153576_at                 | CG6084  | -         | aldehyde reductase activity                                                                                                                                                                                                                                                                                                       | -    | -        | -4,2  | -14,5298 |
| FBgn0036227 | 148620_at                 | CG17826 | -         | -                                                                                                                                                                                                                                                                                                                                 | -    | -        | -2,1  | -4,2322  |
| FBgn0036233 | 148625_at                 | CG6947  | -         | structural constituent of peritrophic membrane (sensu Insecta)                                                                                                                                                                                                                                                                    | -    | -        | -2,5  | -9,5624  |
| FBgn0036316 | 153366_at                 | CG10960 | -         | glucose transporter activity                                                                                                                                                                                                                                                                                                      | -1,5 | -4,7059  | -     | -        |
| FBgn0036334 | 148689_at                 | CG11267 | -         | ATPase activity, coupled / unfolded protein binding                                                                                                                                                                                                                                                                               | -1,6 | -3,0261  | -1,8  | -4,3058  |
| FBgn0036362 | 141395_at                 | CG10725 | -         | structural constituent of peritrophic membrane (sensu Insecta)                                                                                                                                                                                                                                                                    | -    | -        | -3,6  | -8,7635  |
| FBgn0036381 | 148725_at                 | CG8745  | -         | -                                                                                                                                                                                                                                                                                                                                 | -2,0 | -4,3252  | -3,4  | -8,6181  |
| FBgn0036390 | 148732_at                 | CG13738 | -         | -                                                                                                                                                                                                                                                                                                                                 | -8,5 | -8,8156  | -2,3  | -7,2616  |
| FBgn0036422 | 152897_at                 | CG3868  | -         | -                                                                                                                                                                                                                                                                                                                                 | -    | -        | -3,1  | -9,77    |
| FBgn0036424 | 148749_at                 | CG9598  | -         | -                                                                                                                                                                                                                                                                                                                                 | -    | -        | -1,6  | -5,636   |
| FBgn0036436 | 141447_at                 | CG4914  | -         | serine-type endopeptidase activity / trypsin activity                                                                                                                                                                                                                                                                             | -    | -        | -2,5  | -4,787   |
| FBgn0036444 | 154049_at                 | CG32145 | ome       | dipeptidyl-peptidase IV activity                                                                                                                                                                                                                                                                                                  | -    | -        | -1,9  | -3,3749  |
| FBgn0036467 | 148781_at                 | CG12310 | -         | -                                                                                                                                                                                                                                                                                                                                 | -1,9 | -5,1659  | -23,9 | -22,7118 |
| FBgn0036469 | 148783_at                 | CG18649 | -         | -                                                                                                                                                                                                                                                                                                                                 | -6,7 | -9,3138  | -4,1  | -8,4261  |
| FBgn0036470 | 148784_at                 | CG13463 | -         | -                                                                                                                                                                                                                                                                                                                                 | -4,4 | -6,9688  | -1,7  | -2,9609  |
| FBgn0036494 | 153641_at                 | CG7250  | Toll-6    | transmembrane receptor activity / transmembrane receptor protein serine/threonine kinase activity                                                                                                                                                                                                                                 | -1,6 | -5,2649  | -     | -        |
| FBgn0036551 | 148837_at                 | CG17029 | -         | inositol-1(or 4)-monophosphatase activity                                                                                                                                                                                                                                                                                         | -    | -        | -1,6  | -3,9928  |
| FBgn0036599 | 148872_at                 | CG13044 | -         | -                                                                                                                                                                                                                                                                                                                                 | -    | -        | -2,6  | -5,6046  |
| FBgn0036600 | 148873_at                 | CG13043 | -         | -                                                                                                                                                                                                                                                                                                                                 | -2,6 | -8,4903  | -3,9  | -14,6279 |
| FBgn0036605 | 148878_s_at               | CG13041 | -         | -                                                                                                                                                                                                                                                                                                                                 | -3,6 | -5,9729  | -4,8  | -5,8907  |
| FBgn0036606 | 148880_r_at               | CG13060 | -         | -                                                                                                                                                                                                                                                                                                                                 | -3,7 | -5,7984  | -2,4  | -4,9675  |
| FBgn0036607 | 148881_at                 | CG13059 | -         | -                                                                                                                                                                                                                                                                                                                                 | -1,8 | -5,1438  | -1,6  | -7,0281  |
| FBgn0036635 | 141806_at                 | CG32158 | -         | adenylate cyclase activity                                                                                                                                                                                                                                                                                                        | -    | -        | -1,6  | -3,3283  |
| FBgn0036638 | 148900_at                 | CG13033 | -         | -                                                                                                                                                                                                                                                                                                                                 | -1,6 | -3,2442  | -     | -        |
| FBgn0036639 | 155051_at                 | CG4229  | -         | -                                                                                                                                                                                                                                                                                                                                 | -2,1 | -4,1903  | -     | -        |
| FBgn0036642 | 148901_at                 | CG4169  | -         | ubiquinol-cytochrome-c reductase activity                                                                                                                                                                                                                                                                                         | -    | -        | -1,5  | -5,4909  |
| FBgn0036675 | 148923_at                 | CG32171 | Lmpt      | -                                                                                                                                                                                                                                                                                                                                 | -    | -        | -1,7  | -4,2853  |
| FBgn0036677 | 148925_at                 | CG13023 | -         | -                                                                                                                                                                                                                                                                                                                                 | -    | -        | -1,7  | -3,732   |
| FBgn0036737 | 148963_at                 | CG6298  | Jon74E    | chymotrypsin activity                                                                                                                                                                                                                                                                                                             | -2,1 | -3,5989  | -3,5  | -9,3345  |
| FBgn0036765 | 148979_at                 | CG7408  | -         | N-acetylgalactosamine-4-sulfatase activity                                                                                                                                                                                                                                                                                        | -    | -        | -1,9  | -4,0359  |
| FBgn0036779 | 148988_at                 | CG13695 | gk        | -                                                                                                                                                                                                                                                                                                                                 | -1,6 | -2,8991  | -     | -        |
| FBgn0036787 | 148995_at                 | CG4306  | -         | -                                                                                                                                                                                                                                                                                                                                 | -1,5 | -2,9958  | -2,1  | -5,5291  |
| FBgn0036806 | 152798_at                 | CG4120  | Cyp12c1   | electron transporter activity / oxidoreductase activity                                                                                                                                                                                                                                                                           | -    | -        | -2,9  | -9,1253  |
| FBgn0036824 | 152151_at                 | CG3902  | -         | short-branched-chain-acyl-CoA dehydrogenase activity                                                                                                                                                                                                                                                                              | -    | -        | -1,9  | -8,3005  |
| FBgn0036831 | 141416_at                 | CG6839  | -         | -                                                                                                                                                                                                                                                                                                                                 | -    | -        | -1,6  | -3,0605  |
| FBgn0036833 | 149024_at                 | CG3819  | -         | -                                                                                                                                                                                                                                                                                                                                 | -    | -        | -13,2 | -9,186   |
| FBgn0036837 | 155139_at                 | CG18135 | -         | RNA binding / RNA methyltransferase activity                                                                                                                                                                                                                                                                                      | -    | -        | -2,0  | -5,4862  |
| FBgn0036852 | 149033_at                 | CG9739  | fz2       | G-protein coupled receptor activity / transmembrane receptor activity / Wnt receptor activity / Wnt-protein binding                                                                                                                                                                                                               | -    | -        | -1,6  | -3,4852  |
| FBgn0036871 | 149048_r_at               | CG14096 | -         | molecular_function unknown / molecular_function unknown                                                                                                                                                                                                                                                                           | -    | -        | -1,6  | -4,7722  |
| FBgn0036875 | 149052_at                 | CG9449  | -         | acid phosphatase activity                                                                                                                                                                                                                                                                                                         | -2,3 | -6,6777  | -4,0  | -14,1749 |
| FBgn0036945 | 141349_at                 | CG6981  | -         | -                                                                                                                                                                                                                                                                                                                                 | -    | -        | -1,9  | -8,0072  |
| FBgn0036948 | 142733_at                 | CG7298  | -         | structural constituent of peritrophic membrane (sensu Insecta)                                                                                                                                                                                                                                                                    | -4,4 | -8,7319  | -9,7  | -15,6126 |
| FBgn0036949 | 149099_at                 | CG7290  | -         | structural constituent of peritrophic membrane (sensu Insecta)                                                                                                                                                                                                                                                                    | -1,9 | -4,2618  | -25,7 | -13,1711 |

|             |                             |         |             |                                                                                                                                 |       |          |       |          |
|-------------|-----------------------------|---------|-------------|---------------------------------------------------------------------------------------------------------------------------------|-------|----------|-------|----------|
| FBgn0036951 | 149101_at                   | CG7017  | -           | structural constituent of peritrophic membrane (sensu Insecta)                                                                  | -     | -        | -3,7  | -6,0121  |
| FBgn0036952 | 141330_at                   | CG6933  | -           | structural constituent of peritrophic membrane (sensu Insecta)                                                                  | -3,3  | -5,7873  | -8,0  | -9,9512  |
| FBgn0036992 | 151899_at                   | CG11796 | -           | -                                                                                                                               | -     | -        | -3,2  | -4,5731  |
| FBgn0037057 | 152050_at                   | CG10512 | -           | oxidoreductase activity                                                                                                         | -     | -        | -1,7  | -4,6107  |
| FBgn0037069 | 149172_at                   | CG7658  | -           | structural constituent of larval cuticle (sensu Insecta)                                                                        | -     | -        | -3,9  | -11,4871 |
| FBgn0037099 | 142695_at                   | CG7173  | -           | -                                                                                                                               | -     | -        | -1,6  | -3,4077  |
| FBgn0037177 | 149244_at                   | CG14454 | -           | molecular_function unknown                                                                                                      | -2,2  | -6,3242  | -     | -        |
| FBgn0037179 | 149246_at                   | CG14453 | -           | -                                                                                                                               | -6,3  | -9,7564  | -3,4  | -7,1566  |
| FBgn0037180 | 149247_s_at                 | CG14452 | -           | -                                                                                                                               | -19,2 | -18,2423 | -23,5 | -24,4789 |
| FBgn0037181 | 149248_at                   | CG11370 | -           | -                                                                                                                               | -     | -        | -1,9  | -5,8362  |
| FBgn0037204 | 149261_at                   | CG11131 | -           | -                                                                                                                               | -3,0  | -5,2986  | -7,1  | -8,7553  |
| FBgn0037224 | 153953_at                   | CG14639 | -           | -                                                                                                                               | -4,1  | -9,7631  | -     | -        |
| FBgn0037228 | 153398_at                   | CG1092  | -           | -                                                                                                                               | -     | -        | -1,8  | -2,9295  |
| FBgn0037290 | 149305_at                   | CG1124  | -           | -                                                                                                                               | -     | -        | -1,7  | -4,8371  |
| FBgn0037323 | 149329_at                   | CG2663  | -           | carrier activity / tocopherol binding                                                                                           | -     | -        | -1,7  | -5,3564  |
| FBgn0037414 | 149380_at                   | CG1153  | -           | -                                                                                                                               | -2,0  | -8,242   | -1,9  | -6,9851  |
| FBgn0037420 | 149386_at                   | CG15597 | -           | -                                                                                                                               | -     | -        | -1,5  | -4,6613  |
| FBgn0037423 | 154231_at                   | CG1155  | Osi14       | -                                                                                                                               | -2,4  | -6,4915  | -1,7  | -4,1792  |
| FBgn0037424 | 149389_at                   | CG1157  | Osi15       | -                                                                                                                               | -1,7  | -5,2887  | -     | -        |
| FBgn0037429 | 149394_at                   | CG15189 | Osi19       | -                                                                                                                               | -1,7  | -4,4652  | -     | -        |
| FBgn0037430 | 149395_at                   | CG15188 | Osi20       | -                                                                                                                               | -2,2  | -4,794   | -     | -        |
| FBgn0037553 | 151894_at                   | CG18249 | -           | receptor activity                                                                                                               | -     | -        | -1,7  | -3,4796  |
| FBgn0037575 | 149489_at                   | CG7459  | CtrlB       | -                                                                                                                               | -     | -        | -7,7  | -8,7768  |
| FBgn0037607 | 153373_at                   | CG8036  | -           | transketolase activity                                                                                                          | -1,5  | -3,5776  | -1,5  | -3,1654  |
| FBgn0037612 | 149518_at                   | CG8112  | -           | sterol O-acyltransferase activity                                                                                               | -     | -        | -1,6  | -3,2128  |
| FBgn0037643 | 152304_at                   | CG11963 | -           | -                                                                                                                               | -     | -        | -1,8  | -5,5947  |
| FBgn0037672 | 149545_at                   | CG12952 | sage        | transcription factor activity                                                                                                   | -     | -        | -2,1  | -5,4455  |
| FBgn0037678 | 142402_at                   | CG16749 | -           | serine-type endopeptidase activity                                                                                              | -     | -        | -2,7  | -6,9399  |
| FBgn0037695 | 149559_at                   | CG8144  | ps          | pre-mRNA splicing factor activity / RNA binding                                                                                 | -     | -        | -1,5  | -3,118   |
| FBgn0037699 | 154821_at                   | CG8147  | -           | alkaline phosphatase activity / nucleotide phosphatase activity                                                                 | -1,5  | -3,3659  | -2,0  | -5,1465  |
| FBgn0037709 | 152758_at                   | CG8199  | -           | 3-methyl-2-oxobutanoate dehydrogenase (2-methylpropanoyl-transferring) activity                                                 | -     | -        | -1,6  | -3,873   |
| FBgn0037723 | 152178_at                   | CG8327  | Spd5        | spermidine synthase activity                                                                                                    | -     | -        | -1,7  | -6,0474  |
| FBgn0037724 | 153941_at                   | CG9434  | Fst         | -                                                                                                                               | -     | -        | -6,1  | -13,1075 |
| FBgn0037801 | 149624_at                   | CG3999  | -           | -                                                                                                                               | -     | -        | -3,4  | -6,6144  |
| FBgn0037890 | 149681_at                   | CG17734 | -           | -                                                                                                                               | -     | -        | -2,4  | -9,4575  |
| FBgn0037891 | 153115_at                   | CG5214  | -           | acetyltransferase activity                                                                                                      | -     | -        | -1,8  | -5,8246  |
| FBgn0037942 | 149705_at                   | CG14721 | -           | thiamin diphosphokinase activity                                                                                                | -     | -        | -1,5  | -4,5609  |
| FBgn0037992 | 155035_at                   | CG4702  | -           | -                                                                                                                               | -     | -        | -1,8  | -7,8752  |
| FBgn0037996 | 149737_at                   | CG4830  | -           | ligase activity / long-chain fatty acid transporter activity                                                                    | -1,6  | -3,0153  | -2,9  | -5,8123  |
| FBgn0038010 | 149748_at                   | CG11502 | svp         | ligand-dependent nuclear receptor activity / receptor activity / transcription factor activity                                  | -     | -        | -1,6  | -3,2866  |
| FBgn0038022 | 149757_at                   | CG4381  | GstD3       | glutathione transferase activity                                                                                                | -     | -        | -3,1  | -8,2085  |
| FBgn0038024 | 149759_at                   | CG12242 | GstD5       | glutathione transferase activity                                                                                                | -     | -        | -2,7  | -7,0664  |
| FBgn0038034 | 149768_s_at                 | CG17227 | Cyp9F3W     | electron transporter activity / nucleic acid binding / oxidoreductase activity                                                  | -     | -        | -2,7  | -9,2848  |
| FBgn0038037 | 153031_at                   | CG11466 | Cyp9F2      | electron transporter activity / nucleic acid binding / oxidoreductase activity                                                  | -1,9  | -3,997   | -2,8  | -8,9482  |
| FBgn0038081 | 142746_at                   | CG10120 | Men         | carboxy-lyase activity / malate dehydrogenase (oxaloacetate-decarboxylating) (NADP+) activity                                   | -2,1  | -5,4014  | -2,1  | -6,775   |
| FBgn0038126 | 154850_at                   | CG8483  | -           | -                                                                                                                               | -1,6  | -3,073   | -2,3  | -6,4805  |
| FBgn0038135 | 141327_at                   | CG8773  | -           | glutamyl aminopeptidase activity                                                                                                | -     | -        | -2,3  | -6,9124  |
| FBgn0038148 | 149839_f_at                 | CG14377 | -           | -                                                                                                                               | -1,8  | -4,3115  | -     | -        |
| FBgn0038181 | 151605_at                   | CG9297  | -           | calcium ion binding / calmodulin binding                                                                                        | -     | -        | -3,3  | -6,0701  |
| FBgn0038184 | 154936_at                   | CG9285  | Dip-B       | cysteine-type endopeptidase activity / dipeptidyl-peptidase and tripeptidyl-peptidase activity / leucyl aminopeptidase activity | -     | -        | -2,1  | -6,0831  |
| FBgn0038194 | 152120_at                   | CG3050  | Cyp6d5      | electron transporter activity / oxidoreductase activity                                                                         | -5,6  | -9,1167  | -11,6 | -21,3116 |
| FBgn0038222 | 151632_i_at                 | CG3307  | pr-set7     | -                                                                                                                               | -6,3  | -16,3926 | -6,6  | -11,0143 |
| FBgn0038255 | 149913_at                   | CG33967 | -           | -                                                                                                                               | -2,0  | -3,5001  | -     | -        |
| FBgn0038257 | 149914_at                   | CG7390  | smg-30      | calcium ion binding                                                                                                             | -     | -        | -2,0  | -3,8481  |
| FBgn0038271 | 151769_at                   | CG3731  | -           | mitochondrial processing peptidase activity / ubiquinol-cytochrome-c reductase activity                                         | -     | -        | -1,5  | -3,0123  |
| FBgn0038294 | 152565_at                   | CG6803  | Zeelin1     | -                                                                                                                               | -     | -        | -1,9  | -4,5384  |
| FBgn0038297 | 152602_at                   | CG4196  | -           | receptor signaling protein activity                                                                                             | -     | -        | -1,7  | -4,653   |
| FBgn0038353 | 149968_at                   | CG5399  | -           | -                                                                                                                               | -2,8  | -10,7332 | -     | -        |
| FBgn0038372 | 152020_at                   | CG31150 | -           | -                                                                                                                               | -1,6  | -3,4857  | -     | -        |
| FBgn0038400 | 153159_at                   | CG5903  | -           | -                                                                                                                               | -     | -        | -1,5  | -4,0993  |
| FBgn0038408 | 150002_at                   | CG6889  | tara        | -                                                                                                                               | -1,6  | -2,9695  | -     | -        |
| FBgn0038420 | 150008_at                   | CG10311 | -           | -                                                                                                                               | -     | -        | -2,1  | -4,7398  |
| FBgn0038524 | 141596_at                   | CG7623  | sll         | -                                                                                                                               | -     | -        | -1,7  | -4,7976  |
| FBgn0038555 | 150105_at                   | CG31247 | tinc        | -                                                                                                                               | -     | -        | -1,7  | -3,4459  |
| FBgn0038563 | 152336_at                   | CG7780  | DNasell     | -                                                                                                                               | -3,6  | -10,5195 | -3,3  | -7,0226  |
| FBgn0038587 | 150121_at                   | CG7998  | -           | L-malate dehydrogenase activity                                                                                                 | -     | -        | -2,7  | -9,5782  |
| FBgn0038613 | 142662_at                   | CG7678  | -           | hydrogen-exporting ATPase activity, phosphorylative mechanism                                                                   | -     | -        | -2,8  | -5,3989  |
| FBgn0038643 | 150157_at                   | CG14300 | -           | -                                                                                                                               | -     | -        | -2,5  | -7,3824  |
| FBgn0038644 | 150158_at                   | CG7710  | -           | -                                                                                                                               | -     | -        | -3,0  | -10,5113 |
| FBgn0038645 | 150159_at                   | CG7714  | -           | -                                                                                                                               | -4,0  | -10,5368 | -10,1 | -20,5657 |
| FBgn0038646 | 150160_at                   | CG7715  | -           | -                                                                                                                               | -     | -        | -4,9  | -10,3061 |
| FBgn0038647 | 150161_at                   | CG14302 | -           | -                                                                                                                               | -12,0 | -13,1545 | -38,3 | -20,6499 |
| FBgn0038658 | 150168_at                   | CG14292 | -           | -                                                                                                                               | -     | -        | -2,0  | -5,741   |
| FBgn0038701 | 150192_at                   | CG18493 | -           | peptidase activity / serine-type peptidase activity                                                                             | -     | -        | -1,6  | -4,9049  |
| FBgn0038740 | 150223_at                   | CG4562  | -           | ATPase activity, coupled to transmembrane movement of substances / transporter activity                                         | -2,3  | -2,9436  | -2,1  | -3,657   |
| FBgn0038774 | 152841_at                   | CG5023  | -           | actin binding / structural constituent of cytoskeleton                                                                          | -     | -        | -2,5  | -5,3702  |
| FBgn0038795 | 150261_at                   | CG4335  | -           | gamma-butyrobetaine dioxygenase activity                                                                                        | -     | -        | -1,9  | -5,4495  |
| FBgn0038803 | 152563_at                   | CG5191  | -           | hydrolase activity                                                                                                              | -     | -        | -1,7  | -4,342   |
| FBgn0038845 | 144419_at                   | CG10827 | -           | alkaline phosphatase activity / nucleotide phosphatase activity                                                                 | -     | -        | -1,9  | -4,0058  |
| FBgn0038898 | 152442_at                   | CG31233 | -           | membrane alanyl aminopeptidase activity / membrane alanyl aminopeptidase activity                                               | -     | -        | -7,6  | -12,4393 |
| FBgn0038924 | 152903_at                   | CG6028  | -           | carboxy-lyase activity / isomerase activity / lyase activity                                                                    | -1,5  | -4,8825  | -1,5  | -3,9503  |
| FBgn0038973 | 150369_at                   | CG18594 | -           | kinase inhibitor activity / kinase regulator activity                                                                           | -4,6  | -10,8561 | -9,0  | -14,1491 |
| FBgn0038982 | 142587_at                   | CG33093 | -           | gibberellin 20-oxidase activity                                                                                                 | -1,8  | -7,0297  | -2,2  | -8,4907  |
| FBgn0038983 | 150375_at                   | CG5326  | -           | acyltransferase activity / transferase activity                                                                                 | -     | -        | -1,8  | -2,9459  |
| FBgn0038985 | 153620_at                   | CG6921  | -           | acyltransferase activity / transferase activity                                                                                 | -     | -        | -2,6  | -5,0556  |
| FBgn0038986 | 150376_at                   | CG5278  | -           | acyltransferase activity / transferase activity                                                                                 | -     | -        | -1,5  | -3,2303  |
| FBgn0039014 | 150396_at                   | CG6982  | -           | -                                                                                                                               | -1,6  | -2,7895  | -     | -        |
| FBgn0039049 | 150421_at                   | CG6726  | -           | NOT aminoacylase activity                                                                                                       | -     | -        | -1,9  | -3,9133  |
| FBgn0039052 | 150424_at                   | CG6733  | -           | NOT aminoacylase activity                                                                                                       | -2,5  | -5,9047  | -14,8 | -18,8476 |
| FBgn0039053 | 150425_at                   | CG6738  | -           | NOT aminoacylase activity                                                                                                       | -     | -        | -2,0  | -3,6967  |
| FBgn0039064 | 150434_at                   | CG4467  | -           | glutamyl aminopeptidase activity                                                                                                | -     | -        | -1,6  | -3,0517  |
| FBgn0039094 | 154671_at                   | CG10184 | -           | -                                                                                                                               | -     | -        | -2,1  | -4,1787  |
| FBgn0039098 | 142671_at                   | CG13822 | -           | -                                                                                                                               | -2,6  | -5,236   | -3,0  | -5,6425  |
| FBgn0039197 | 150509_at                   | CG17780 | -           | -                                                                                                                               | -     | -        | -1,8  | -4,7271  |
| FBgn0039200 | 150511_at                   | CG13616 | -           | -                                                                                                                               | -     | -        | -2,0  | -5,8713  |
| FBgn0039297 | 150565_at                   | CG11852 | -           | -                                                                                                                               | -2,3  | -2,9337  | -2,0  | -5,6966  |
| FBgn0039301 | 150568_at                   | CG11875 | -           | -                                                                                                                               | -1,5  | -3,2059  | -     | -        |
| FBgn0039317 | 150580_at                   | CG31102 | -           | -                                                                                                                               | -     | -        | -1,9  | -3,5068  |
| FBgn0039349 | 152837_at                   | CG4685  | -           | -                                                                                                                               | -     | -        | -1,9  | -4,4315  |
| FBgn0039416 | 150652_at                   | CG31323 | -           | -                                                                                                                               | -     | -        | -4,0  | -6,0048  |
| FBgn0039435 | 150664_at                   | CG14240 | -           | -                                                                                                                               | -     | -        | -1,9  | -4,6942  |
| FBgn0039436 | 150665_s_at                 | CG6478  | -           | -                                                                                                                               | -     | -        | -3,0  | -11,9506 |
| FBgn0039438 | 150666_at                   | CG6452  | -           | -                                                                                                                               | -     | -        | -7,5  | -13,7133 |
| FBgn0039441 | 150670_i_at/<br>150671_f_at | CG5476  | -           | -                                                                                                                               | -     | -        | -3,0  | -7,6343  |
| FBgn0039453 | 150683_at                   | CG6403  | -           | -                                                                                                                               | -     | -        | -1,7  | -8,9675  |
| FBgn0039468 | 150697_at                   | CG31075 | -           | aldehyde dehydrogenase (NAD) activity                                                                                           | -     | -        | -1,6  | -6,2214  |
| FBgn0039471 | 150699_at                   | CG6295  | -           | triacylglycerol lipase activity                                                                                                 | -     | -        | -11,9 | -12,8215 |
| FBgn0039493 | 151522_at                   | CG5889  | Mdh         | carboxy-lyase activity / malate dehydrogenase (oxaloacetate-decarboxylating) (NADP+) activity                                   | -     | -        | -2,1  | -5,5441  |
| FBgn0039539 | 154473_at                   | CG12880 | -           | -                                                                                                                               | -     | -        | -2,3  | -8,1883  |
| FBgn0039567 | 150762_at                   | CG4869  | betaTub97EF | structural constituent of cytoskeleton / tubulin binding                                                                        | -     | -        | -2,1  | -7,245   |

|             |             |         |                 |                                                                                                 |       |          |       |          |
|-------------|-------------|---------|-----------------|-------------------------------------------------------------------------------------------------|-------|----------|-------|----------|
| FBgn0039586 | 142182_s_at | CG33103 | Ppn             | metallopeptidase activity / serine-type endopeptidase inhibitor activity                        | -     | -        | -1,7  | -3,5727  |
| FBgn0039611 | 150791_at   | CG14528 | -               | metalloendopeptidase activity                                                                   | -     | -        | -1,6  | -4,0791  |
| FBgn0039670 | 150825_at   | CG7567  | -               | -                                                                                               | -     | -        | -1,7  | -3,2357  |
| FBgn0039671 | 150826_at   | CG11470 | -               | -                                                                                               | -     | -        | -1,7  | -5,4398  |
| FBgn0039682 | 150834_at   | CG7584  | Obp99c          | -                                                                                               | -     | -        | -     | -        |
| FBgn0039686 | 150838_at   | CG15506 | -               | -                                                                                               | -1,8  | -4,039   | -3,2  | -13,2527 |
| FBgn0039737 | 153339_at   | CG7920  | -               | 4-hydroxybutyrate CoA-transferase activity                                                      | -     | -        | -2,0  | -7,4177  |
| FBgn0039760 | 141310_at   | CG9682  | -               | -                                                                                               | -1,9  | -4,2499  | -2,4  | -8,0908  |
| FBgn0039777 | 150893_f_at | CG2229  | Jon99Fii        | elastase activity / NOT serine-type endopeptidase activity / serine-type endopeptidase activity | -     | -        | -5,2  | -7,0514  |
| FBgn0039778 | 141369_at   | CG18030 | Jon99Fi         | elastase activity / NOT serine-type endopeptidase activity / serine-type endopeptidase activity | -10,8 | -12,3942 | -58,5 | -35,8775 |
| FBgn0039779 | 150894_at   | CG1546  | PH4alpha5G2     | procollagen-proline 4-dioxygenase activity                                                      | -10,7 | -12,5847 | -94,3 | -43,8981 |
| FBgn0039800 | 142413_at   | CG11314 | -               | -                                                                                               | -2,1  | -3,2856  | -3,6  | -8,773   |
| FBgn0039825 | 152434_at   | CG31004 | -               | -                                                                                               | -     | -        | -1,7  | -5,1293  |
| FBgn0039851 | 151691_at   | CG12063 | -               | -                                                                                               | -1,6  | -3,3141  | -2,5  | -10,3848 |
| FBgn0039852 | 150946_at   | CG1499  | -               | -                                                                                               | -     | -        | -2,0  | -6,2559  |
| FBgn0039915 | 150984_at   | CG1732  | -               | gamma-aminobutyric acid:sodium symporter activity                                               | -     | -        | -1,6  | -2,8878  |
| FBgn0040529 | 151016_at   | CG9603  | -               | cytochrome-c oxidase activity                                                                   | -     | -        | -1,7  | -3,7421  |
| FBgn0040609 | 151094_at   | CG3348  | -               | -                                                                                               | -     | -        | -1,5  | -2,806   |
| FBgn0040764 | 151237_at   | CG13230 | -               | -                                                                                               | -     | -        | -1,7  | -4,5751  |
| FBgn0040813 | 151287_at   | CG11051 | Nplp2           | -                                                                                               | -     | -        | -2,4  | -15,9996 |
| FBgn0040819 | 151293_f_at | CG33269 | -               | -                                                                                               | -1,5  | -3,4168  | -1,5  | -2,9219  |
| FBgn0040843 | 151316_at   | CG15213 | -               | -                                                                                               | -4,0  | -4,7333  | -2,1  | -4,3938  |
| FBgn0040941 | 151408_at   | CG15308 | -               | -                                                                                               | -     | -        | -3,0  | -5,5837  |
| FBgn0040950 | 151415_at   | CG13990 | -               | -                                                                                               | -     | -        | -2,0  | -5,2142  |
| FBgn0040958 | 151421_at   | CG31893 | Peritrophin-15b | -                                                                                               | -2,6  | -4,6508  | -10,1 | -14,3875 |
| FBgn0040959 | 151422_at   | CG17814 | Peritrophin-15a | -                                                                                               | -     | -        | -1,8  | -5,4577  |
| FBgn0040993 | 151452_at   | CG17325 | -               | -                                                                                               | -     | -        | -3,0  | -7,8643  |
|             |             |         |                 |                                                                                                 | -     | -        | -2,3  | -3,5688  |

Table S6. Genes responsive to Abd-B induction

Up-regulated genes:

| FB code     | Affy identifier           | CG numbers | Synonyms   | Description / Molecular function                                                                                                                                                                | Fold change st11 | t-value st11 | Fold change st12 | t-value st12 |
|-------------|---------------------------|------------|------------|-------------------------------------------------------------------------------------------------------------------------------------------------------------------------------------------------|------------------|--------------|------------------|--------------|
| FBgn0000055 | 151802_at                 | CG3481     | Adh        | -                                                                                                                                                                                               | 2,8              | 7,7156       | 2,5              | 8,1462       |
| FBgn0000320 | 152004_at                 | CG9554     | cli        | -                                                                                                                                                                                               | 2,0              | 4,2027       | 2,3              | 4,4066       |
| FBgn0000368 | 153779_at                 | CG6383     | crb        | protein binding / receptor activity / receptor binding / spectrin binding / structural molecule activity                                                                                        | -                | -            | 1,5              | 3,004        |
| FBgn0000406 | 151932_at                 | CG13279    | Cyt-b5-r   | electron transporter activity / electron transporter activity / oxidoreductase activity                                                                                                         | 1,7              | 4,6848       | -                | -            |
| FBgn0000576 | 143149_at                 | CG2988     | ems        | specific RNA polymerase II transcription factor activity                                                                                                                                        | 1,8              | 3,5047       | -                | -            |
| FBgn0001138 | 143180_at                 | CG9656     | grn        | general RNA polymerase II transcription factor activity / RNA polymerase II transcription factor activity                                                                                       | 2,5              | 4,3205       | 2,1              | 3,1375       |
| FBgn0001208 | 153434_at                 | CG7399     | Hn         | tryptophan 5-monoxygenase activity                                                                                                                                                              | -                | -            | 5,3              | 7,1862       |
| FBgn0001256 | 141386_at                 | CG10717    | ImpL1      | -                                                                                                                                                                                               | 2,2              | 4,9599       | 2,5              | 6,3303       |
| FBgn0001257 | 141688_at                 | CG15009    | ImpL2      | -                                                                                                                                                                                               | 1,6              | 3,857        | 1,9              | 5,99         |
| FBgn0001991 | 151837_at                 | CG4894     | Ca-alpha1D | voltage-gated calcium channel activity                                                                                                                                                          | 4,5              | 6,7173       | 3,1              | 5,2713       |
| FBgn0002570 | 143242_at                 | CG8696     | LvpH       | alpha-glucosidase activity                                                                                                                                                                      | 5,7              | 4,6659       | 8,0              | 8,3321       |
| FBgn0002629 | 143251_at                 | CG6099     | m4         | -                                                                                                                                                                                               | -                | -            | 1,6              | 4,0439       |
| FBgn0002631 | 143252_at                 | CG6096     | HLLHm5     | DNA binding / specific transcriptional repressor activity / transcription factor activity                                                                                                       | -                | -            | 1,9              | 3,2189       |
| FBgn0002970 | 143285_at                 | CG6246     | nub        | RNA polymerase II transcription factor activity / transcription factor activity                                                                                                                 | 3,0              | 7,102        | -                | -            |
| FBgn0003130 | 143309_at                 | CG8246     | Poxn       | specific RNA polymerase II transcription factor activity / transcription regulator activity                                                                                                     | 2,1              | 2,8955       | 3,2              | 4,0166       |
| FBgn0003162 | 154812_at                 | CG9441     | Pu         | GTP cyclohydrolase I activity                                                                                                                                                                   | -                | -            | 2,6              | 3,5458       |
| FBgn0003187 | 143316_at                 | CG6433     | qua        | actin binding / calcium ion binding / structural constituent of cytoskeleton                                                                                                                    | -                | -            | 3,2              | 3,2026       |
| FBgn0003356 | 143338_f_at               | CG31034    | Jon99Cii   | chymotrypsin activity / chymotrypsin activity / serine-type endopeptidase activity / serine-type peptidase activity / serine-type peptidase activity                                            | 10,4             | 8,808        | -                | -            |
| FBgn0003357 | 143340_f_at / 143339_i_at | CG31362    | Jon99Ciii  | chymotrypsin activity / chymotrypsin activity / serine-type endopeptidase activity / serine-type endopeptidase activity / serine-type peptidase activity / serine-type peptidase activity       | 5,0              | 12,3251      | -                | -            |
| FBgn0003495 | 141691_at                 | CG6134     | spz        | cytokine activity / morphogen activity / Toll binding                                                                                                                                           | 2,7              | 3,8469       | 11,4             | 8,9711       |
| FBgn0003749 | 143382_at                 | CG6883     | trh        | protein heterodimerization activity / RNA polymerase II transcription factor activity / transcription factor activity                                                                           | 1,5              | 3,1364       | 2,4              | 3,0092       |
| FBgn0003867 | 143387_at                 | CG6705     | tsl        | torso binding                                                                                                                                                                                   | 1,6              | 3,8024       | -                | -            |
| FBgn0003997 | 143411_at                 | CG5123     | W          | -                                                                                                                                                                                               | 1,8              | 4,4774       | -                | -            |
| FBgn0004509 | 154664_at                 | CG10772    | Fur1       | furin activity                                                                                                                                                                                  | 1,5              | 4,1843       | 1,6              | 3,8826       |
| FBgn0004554 | 143480_at                 | CG7539     | Edg91      | structural constituent of pupal cuticle (sensu Insecta)                                                                                                                                         | -                | -            | 2,5              | 4,7458       |
| FBgn0004579 | 143487_at                 | CG6464     | salm       | specific RNA polymerase II transcription factor activity / transcription regulator activity                                                                                                     | 2,7              | 10,6083      | 2,8              | 4,6331       |
| FBgn0004895 | 143530_at                 | CG1132     | fd64A      | transcription factor activity                                                                                                                                                                   | 2,4              | 4,9918       | -                | -            |
| FBgn0010453 | 143629_at                 | CG4698     | Wnt4       | receptor binding / signal transducer activity                                                                                                                                                   | 1,8              | 5,2958       | 1,7              | 5,1334       |
| FBgn0011591 | 143664_at                 | CG10580    | fng        | acetylglucosaminyltransferase activity / receptor binding / transferase activity, transferring glycosyl groups / UDP-glycosyltransferase activity                                               | 4,1              | 10,9155      | 3,7              | 6,2899       |
| FBgn0011653 | 141377_at                 | CG15002    | mas        | NOT peptidase activity / NOT serine-type endopeptidase activity                                                                                                                                 | 5,5              | 10,5078      | -                | -            |
| FBgn0011706 | 143680_at                 | CG4319     | rpr        | -                                                                                                                                                                                               | 5,4              | 9,7585       | 3,8              | 6,664        |
| FBgn0012037 | 153728_at                 | CG8827     | Ance       | peptidyl-dipeptidase A activity / zinc ion binding                                                                                                                                              | 2,3              | 6,0432       | 2,3              | 5,4155       |
| FBgn0013751 | 143717_at                 | CG1072     | Awh        | transcription factor activity                                                                                                                                                                   | 2,2              | 3,5092       | 3,1              | 4,0459       |
| FBgn0014469 | 154078_at                 | CG2060     | Cyp4e2     | electron transporter activity / oxidoreductase activity                                                                                                                                         | 1,9              | 5,076        | -                | -            |
| FBgn0015037 | 143782_at                 | CG10842    | Cyp4p1     | electron transporter activity / oxidoreductase activity                                                                                                                                         | 3,9              | 4,2119       | 2,9              | 3,7972       |
| FBgn0015946 | 143862_at                 | CG4345     | grim       | -                                                                                                                                                                                               | 2,3              | 4,1538       | 2,2              | 4,1172       |
| FBgn0017448 | 143890_at                 | CG2187     | -          | cation transporter activity / sodium:iodide symporter activity                                                                                                                                  | 1,8              | 2,9258       | -                | -            |
| FBgn0019952 | 152843_at                 | CG6331     | Orct       | cation transporter activity / organic cation transporter activity                                                                                                                               | -                | -            | 1,9              | 4,7209       |
| FBgn0020294 | 143918_at                 | CG10573    | ko         | -                                                                                                                                                                                               | -                | -            | 3,3              | 3,6053       |
| FBgn0023520 | 152934_at                 | CG3857     | -          | -                                                                                                                                                                                               | -                | -            | -                | -            |
| FBgn0024245 | 141525_at                 | CG17559    | dnt        | protein-tyrosine kinase activity / transmembrane receptor protein tyrosine kinase activity                                                                                                      | 2,2              | 5,665        | -                | -            |
| FBgn0024989 | 144042_at                 | CG3777     | -          | endopeptidase inhibitor activity                                                                                                                                                                | 2,2              | 3,3891       | 2,5              | 3,6896       |
| FBgn0025583 | 144068_at                 | CG18106    | IM2        | -                                                                                                                                                                                               | -                | -            | 2,1              | 3,4482       |
| FBgn0027348 | 153318_at                 | CG4501     | bgm        | -                                                                                                                                                                                               | 2,8              | 5,248        | 2,1              | 3,6125       |
| FBgn0027516 | 142661_at                 | CG18617    | Vha100-2   | -                                                                                                                                                                                               | 1,5              | 3,4478       | -                | -            |
| FBgn0027573 | 152119_at                 | CG5518     | sda        | hydrolase activity                                                                                                                                                                              | -                | -            | 2,9              | 3,8214       |
| FBgn0027945 | 141370_at                 | CG7758     | ppl        | -                                                                                                                                                                                               | -                | -            | 2,2              | 4,8937       |
| FBgn0028536 | 144233_at                 | CG15281    | -          | -                                                                                                                                                                                               | 2,6              | 6,085        | 7,1              | 4,4702       |
| FBgn0028646 | 154731_at                 | CG2139     | aralar1    | calcium ion binding / carrier activity                                                                                                                                                          | 2,5              | 4,8602       | -                | -            |
| FBgn0028679 | 144243_at                 | CG5661     | Sema-5c    | receptor activity / receptor binding / serine-type endopeptidase inhibitor activity                                                                                                             | 1,7              | 3,2612       | 2,8              | 6,188        |
| FBgn0028878 | 142688_at                 | CG15269    | -          | nucleic acid binding / RNA polymerase II transcription factor activity / single-stranded DNA binding / transcription regulator activity                                                         | -                | -            | 2,8              | 4,1921       |
| FBgn0028940 | 152734_at                 | CG8864     | Cyp28a5    | electron transporter activity / oxidoreductase activity                                                                                                                                         | -                | -            | 2,8              | 3,4468       |
| FBgn0029823 | 144561_at                 | CG3011     | -          | glycine hydroxymethyltransferase activity                                                                                                                                                       | -                | -            | 2,6              | 4,9893       |
| FBgn0029830 | 144566_at                 | CG14447    | Grip       | -                                                                                                                                                                                               | 3,3              | 5,0227       | 2,1              | 2,956        |
| FBgn0029901 | 153038_at                 | CG3135     | shf        | receptor activity / receptor binding                                                                                                                                                            | 1,9              | 3,0975       | -                | -            |
| FBgn0029994 | 144675_at                 | CG2254     | -          | oxidoreductase activity                                                                                                                                                                         | 1,6              | 3,1552       | 2,5              | 4,0928       |
| FBgn0030160 | 144771_at                 | CG9691     | -          | -                                                                                                                                                                                               | -                | -            | 1,9              | 3,2648       |
| FBgn0030218 | 144814_at                 | CG1628     | -          | carrier activity / L-ornithine transporter activity                                                                                                                                             | 2,4              | 4,6912       | 2,2              | 3,7635       |
| FBgn0030362 | 141568_at                 | CG1803     | regucalcin | -                                                                                                                                                                                               | 3,3              | 5,8695       | 5,7              | 10,0001      |
| FBgn0030478 | 141639_at                 | CG1640     | -          | -                                                                                                                                                                                               | -                | -            | 2,4              | 4,37         |
| FBgn0030766 | 145198_at                 | CG4521     | mthl1      | G-protein coupled receptor activity                                                                                                                                                             | 2,0              | 3,2706       | -                | -            |
| FBgn0030900 | 145282_at                 | CG15064    | Him        | -                                                                                                                                                                                               | 1,8              | 3,7285       | -                | -            |
| FBgn0031001 | 145358_at                 | CG7884     | -          | -                                                                                                                                                                                               | 2,1              | 4,1058       | -                | -            |
| FBgn0031010 | 145363_at                 | CG8028     | -          | monocarboxylic acid transporter activity                                                                                                                                                        | 3,0              | 5,1833       | 1,6              | 4,2644       |
| FBgn0031558 | 145728_at                 | CG16704    | -          | serine-type endopeptidase inhibitor activity                                                                                                                                                    | -                | -            | 1,5              | 4,2933       |
| FBgn0031561 | 145731_at                 | CG16712    | -          | serine-type endopeptidase inhibitor activity                                                                                                                                                    | 2,3              | 5,463        | 3,3              | 5,1174       |
| FBgn0031792 | 145882_at                 | CG13983    | -          | -                                                                                                                                                                                               | 2,0              | 3,9521       | 5,2              | 5,8462       |
| FBgn0031899 | 153385_at                 | CG4675     | Ndae1      | anion exchanger activity / bicarbonate transporter activity / cation transporter activity / high affinity inorganic phosphate:sodium symporter activity / sodium:bicarbonate symporter activity | 1,5              | 3,1297       | -                | -            |
| FBgn0031907 | 154061_at                 | CG5171     | -          | -                                                                                                                                                                                               | 1,5              | 3,2707       | -                | -            |
| FBgn0031931 | 145970_at                 | CG7052     | Tepil      | antibacterial humoral response (sensu Protostomia)                                                                                                                                              | 5,9              | 16,9101      | 6,4              | 9,8844       |
| FBgn0031949 | 141497_at                 | CG7144     | -          | saccharopine dehydrogenase (NAD+, L-lysine-forming) activity                                                                                                                                    | 1,6              | 4,1949       | 3,7              | 6,7556       |
| FBgn0031970 | 152154_at                 | CG7227     | -          | scavenger receptor activity                                                                                                                                                                     | -                | -            | 3,2              | 5,0899       |
| FBgn0032020 | 146020_at                 | CG7787     | -          | guanyl-nucleotide exchange factor activity / zinc ion binding                                                                                                                                   | 1,5              | 3,5049       | -                | -            |
| FBgn0032253 | 146162_at                 | CG5322     | -          | alpha-mannosidase activity / hydrolase activity, hydrolyzing N-glycosyl compounds                                                                                                               | 1,8              | 3,1231       | -                | -            |
| FBgn0032287 | 151967_at                 | CG6415     | -          | -                                                                                                                                                                                               | -                | -            | 3,7              | 10,6637      |
| FBgn0032387 | 146262_at                 | CG16965    | -          | -                                                                                                                                                                                               | 4,3              | 6,24         | 5,2              | 4,5869       |
| FBgn0032414 | 146274_at                 | CG17211    | -          | -                                                                                                                                                                                               | 2,5              | 3,7337       | 3,3              | 6,9656       |
| FBgn0032426 | 146285_at                 | CG31764    | vir-1      | -                                                                                                                                                                                               | -                | -            | 2,2              | 4,2704       |
| FBgn0032433 | 154627_at                 | CG5427     | Oatp33Ea   | -                                                                                                                                                                                               | -                | -            | 1,8              | 3,8913       |

|             |             |         |           |                                                                                                                                                                                                                                                                     |   |      |         |      |         |
|-------------|-------------|---------|-----------|---------------------------------------------------------------------------------------------------------------------------------------------------------------------------------------------------------------------------------------------------------------------|---|------|---------|------|---------|
| FBgn0032473 | 146312_at   | CG5204  | -         | -                                                                                                                                                                                                                                                                   | - | 1,7  | 4,4246  | -    | -       |
| FBgn0032601 | 155013_at   | CG17914 | yellow-b  | -                                                                                                                                                                                                                                                                   | - | 1,8  | 3,9974  | 3,8  | 3,58    |
| FBgn0032604 | 146377_at   | CG13270 | Ugt36Ba   | glucuronosyltransferase activity                                                                                                                                                                                                                                    | - | 1,7  | 3,7032  | -    | -       |
| FBgn0032806 | 146503_at   | CG10363 | TepIV     | protease inhibitor activity                                                                                                                                                                                                                                         | - | 2,3  | 7,4785  | 3,1  | 7,2998  |
| FBgn0032820 | 151797_at   | CG31692 | fbp       | fructose-bisphosphatase activity                                                                                                                                                                                                                                    | - | 1,6  | 3,2149  | -    | -       |
| FBgn0033234 | 153231_at   | CG8791  | -         | high affinity inorganic phosphate:sodium symporter activity                                                                                                                                                                                                         | - | 5,9  | 6,1986  | 8,7  | 7,2399  |
| FBgn0033295 | 142359_at   | CG30359 | -         | glucosidase activity / glucosidase activity / hydrolase activity / hydrolase activity / transporter activity / transporter activity                                                                                                                                 | - | -    | -       | 1,8  | 3,1536  |
| FBgn0033373 | 152258_at   | CG8080  | -         | -                                                                                                                                                                                                                                                                   | - | 1,6  | 3,2685  | -    | -       |
| FBgn0033395 | 152833_at   | CG1944  | Cyp4p2    | electron transporter activity / oxidoreductase activity                                                                                                                                                                                                             | - | 2,0  | 5,651   | 2,2  | 5,2735  |
| FBgn0033565 | 152569_at   | CG18003 | -         | glycolate oxidase activity                                                                                                                                                                                                                                          | - | 2,1  | 2,8799  | 2,3  | 5,0009  |
| FBgn0033642 | 147027_at   | CG30035 | -         | fructose transporter activity / glucose transporter activity / glucose transporter activity                                                                                                                                                                         | - | 1,6  | 3,068   | 3,1  | 4,6642  |
| FBgn0033674 | 142663_at   | CG8964  | -         | kinase activity / non-membrane spanning protein tyrosine kinase activity / protein kinase activity / receptor activity / transmembrane receptor activity / transmembrane receptor protein kinase activity / transmembrane receptor protein tyrosine kinase activity | - | 2,7  | 7,2423  | -    | -       |
| FBgn0033799 | 142248_at   | CG4604  | Glaz      | binding / carrier activity                                                                                                                                                                                                                                          | - | 1,5  | 3,3731  | -    | -       |
| FBgn0033835 | 147151_at   | CG18279 | IM10      | -                                                                                                                                                                                                                                                                   | - | 3,5  | 3,8661  | 7,2  | 9,4273  |
| FBgn0033857 | 152245_at   | CG13335 | -         | -                                                                                                                                                                                                                                                                   | - | -    | -       | 3,7  | 6,9476  |
| FBgn0033910 | 141381_at   | CG30069 | -         | -                                                                                                                                                                                                                                                                   | - | -    | -       | 3,1  | 5,0251  |
| FBgn0033939 | 147205_at   | CG17390 | -         | -                                                                                                                                                                                                                                                                   | - | -    | -       | 1,9  | 3,1207  |
| FBgn0033945 | 147210_at   | CG12868 | -         | -                                                                                                                                                                                                                                                                   | - | -    | -       | 2,4  | 3,5234  |
| FBgn0033968 | 141323_at   | CG10200 | -         | -                                                                                                                                                                                                                                                                   | - | -    | -       | 3,7  | 7,1777  |
| FBgn0034190 | 141536_at   | CG8946  | Sply      | -                                                                                                                                                                                                                                                                   | - | -    | -       | 2,0  | 2,8057  |
| FBgn0034276 | 152764_at   | CG6385  | -         | sarcosine dehydrogenase activity                                                                                                                                                                                                                                    | - | -    | -       | 1,8  | 5,0491  |
| FBgn0034290 | 142954_at   | CG5773  | -         | -                                                                                                                                                                                                                                                                   | - | 2,2  | 3,9721  | 1,9  | 3,6191  |
| FBgn0034329 | 147431_at   | CG18108 | IM1       | -                                                                                                                                                                                                                                                                   | - | 2,8  | 4,7792  | 9,7  | 6,5558  |
| FBgn0034388 | 141242_at   | CG15092 | -         | -                                                                                                                                                                                                                                                                   | - | -    | -       | 1,6  | 3,005   |
| FBgn0034408 | 151924_at   | CG12758 | sano      | -                                                                                                                                                                                                                                                                   | - | 2,9  | 8,2518  | 1,9  | 3,9568  |
| FBgn0034436 | 153470_at   | CG11961 | -         | -                                                                                                                                                                                                                                                                   | - | 1,6  | 3,2775  | -    | -       |
| FBgn0034437 | 147492_at   | CG10051 | -         | -                                                                                                                                                                                                                                                                   | - | -    | -       | 2,7  | 3,6624  |
| FBgn0034468 | 147514_at   | CG11797 | Obp56a    | -                                                                                                                                                                                                                                                                   | - | 2,0  | 4,9635  | -    | -       |
| FBgn0034470 | 147516_at   | CG11218 | Obp56d    | -                                                                                                                                                                                                                                                                   | - | -    | -       | 2,5  | 5,5537  |
| FBgn0034501 | 141541_at   | CG13868 | -         | -                                                                                                                                                                                                                                                                   | - | -    | -       | 1,8  | 2,8116  |
| FBgn0034514 | 147549_at   | CG13427 | -         | -                                                                                                                                                                                                                                                                   | - | 3,1  | 9,7604  | 6,4  | 13,7158 |
| FBgn0034515 | 147550_at   | CG13428 | -         | -                                                                                                                                                                                                                                                                   | - | 2,0  | 2,9203  | 1,5  | 4,317   |
| FBgn0034736 | 147681_at   | CG6018  | -         | carboxylesterase activity                                                                                                                                                                                                                                           | - | -    | -       | 2,2  | 3,7123  |
| FBgn0035089 | 147903_at   | CG9358  | Phk-3     | -                                                                                                                                                                                                                                                                   | - | 4,1  | 5,6126  | 3,1  | 9,3534  |
| FBgn0035169 | 147946_at   | CG13890 | -         | dodecenoyl-CoA delta-isomerase activity / hydro-lyase activity                                                                                                                                                                                                      | - | 1,6  | 2,8833  | 1,8  | 3,5448  |
| FBgn0035325 | 148033_at   | CG13806 | -         | -                                                                                                                                                                                                                                                                   | - | -    | -       | 2,0  | 5,5021  |
| FBgn0035326 | 141439_at   | CG32302 | -         | -                                                                                                                                                                                                                                                                   | - | 4,0  | 7,5581  | 14,4 | 13,348  |
| FBgn0035347 | 141711_at   | CG33232 | -         | actin binding / structural constituent of cytoskeleton                                                                                                                                                                                                              | - | 1,8  | 5,4056  | -    | -       |
| FBgn0035434 | 148103_at   | CG10812 | dro5      | -                                                                                                                                                                                                                                                                   | - | 2,4  | 5,7151  | 2,3  | 5,582   |
| FBgn0035653 | 148245_at   | CG33993 | -         | -                                                                                                                                                                                                                                                                   | - | 2,0  | 4,209   | -    | -       |
| FBgn0035794 | 148343_at   | CG32372 | -         | -                                                                                                                                                                                                                                                                   | - | 2,7  | 6,3721  | 2,3  | 5,3103  |
| FBgn0035798 | 154595_at   | CG7526  | -         | kinase activity / protein kinase activity / receptor activity / structural molecule activity / transmembrane receptor protein kinase activity / transmembrane receptor protein tyrosine kinase activity                                                             | - | -    | -       | 1,9  | 3,2746  |
| FBgn0035835 | 152824_at   | CG7915  | Ect4      | -                                                                                                                                                                                                                                                                   | - | 1,6  | 2,8297  | 2,0  | 3,5069  |
| FBgn0035927 | 141748_at   | CG32030 | -         | actin binding                                                                                                                                                                                                                                                       | - | -    | -       | 1,9  | 3,6288  |
| FBgn0035961 | 153070_at   | CG4821  | Tequila   | pancreatic elastase activity / serine-type endopeptidase activity / trypsin activity                                                                                                                                                                                | - | 2,0  | 6,9508  | 1,8  | 5,5227  |
| FBgn0036073 | 148512_at   | CG6611  | ect       | -                                                                                                                                                                                                                                                                   | - | -    | -       | 2,2  | 3,1102  |
| FBgn0036262 | 148639_at   | CG6910  | -         | oxidoreductase activity                                                                                                                                                                                                                                             | - | -    | -       | -    | -       |
| FBgn0036321 | 148678_at   | CG14120 | -         | -                                                                                                                                                                                                                                                                   | - | 2,3  | 4,1621  | -    | -       |
| FBgn0036352 | 148705_at   | CG14110 | -         | -                                                                                                                                                                                                                                                                   | - | 5,2  | 7,7527  | 15,1 | 11,087  |
| FBgn0036436 | 141447_at   | CG4914  | -         | serine-type endopeptidase activity / trypsin activity                                                                                                                                                                                                               | - | 18,7 | 20,4305 | 8,1  | 13,7666 |
| FBgn0036457 | 148772_at   | CG3396  | Ocho      | -                                                                                                                                                                                                                                                                   | - | -    | -       | 4,7  | 5,7914  |
| FBgn0036612 | 148885_at   | CG4998  | -         | NOT serine-type endopeptidase activity                                                                                                                                                                                                                              | - | 1,9  | 4,3028  | -    | -       |
| FBgn0036632 | 148896_at   | CG32159 | -         | -                                                                                                                                                                                                                                                                   | - | -    | -       | 2,3  | 4,4504  |
| FBgn0036675 | 148923_at   | CG32171 | Lmpt      | -                                                                                                                                                                                                                                                                   | - | -    | -       | 2,8  | 5,2634  |
| FBgn0036677 | 148925_at   | CG13023 | -         | -                                                                                                                                                                                                                                                                   | - | 7,1  | 10,5315 | 5,9  | 6,8217  |
| FBgn0036678 | 142769_at   | CG11905 | -         | -                                                                                                                                                                                                                                                                   | - | 5,2  | 8,6691  | 10,1 | 10,106  |
| FBgn0036764 | 152169_at   | CG5535  | -         | cationic amino acid transporter activity                                                                                                                                                                                                                            | - | -    | -       | 1,7  | 3,1914  |
| FBgn0036779 | 148988_at   | CG13695 | gk        | -                                                                                                                                                                                                                                                                   | - | 1,6  | 3,0352  | -    | -       |
| FBgn0036786 | 148994_at   | CG13701 | skl       | -                                                                                                                                                                                                                                                                   | - | 4,1  | 5,0608  | 5,0  | 5,2677  |
| FBgn0036871 | 149048_r_at | CG14096 | -         | molecular function unknown / molecular function unknown                                                                                                                                                                                                             | - | 3,2  | 5,7301  | 2,8  | 4,2048  |
| FBgn0036891 | 149063_at   | CG9372  | -         | serine-type peptidase activity / trypsin activity                                                                                                                                                                                                                   | - | -    | -       | 2,6  | 5,0745  |
| FBgn0037000 | 149132_at   | CG5130  | -         | zinc ion transporter activity                                                                                                                                                                                                                                       | - | 1,9  | 5,1659  | 6,9  | 6,0175  |
| FBgn0037140 | 149215_at   | CG7442  | -         | carbohydrate transporter activity / organic cation porter activity                                                                                                                                                                                                  | - | 1,9  | 3,1592  | -    | -       |
| FBgn0037181 | 149248_at   | CG11370 | -         | -                                                                                                                                                                                                                                                                   | - | -    | -       | 2,0  | 4,0343  |
| FBgn0037323 | 149329_at   | CG2663  | -         | carrier activity / tocopherol binding                                                                                                                                                                                                                               | - | -    | -       | 4,8  | 6,5753  |
| FBgn0037414 | 149380_at   | CG1153  | Osi7      | -                                                                                                                                                                                                                                                                   | - | -    | -       | 2,8  | 5,4215  |
| FBgn0037423 | 154231_at   | CG1155  | Osi14     | -                                                                                                                                                                                                                                                                   | - | 1,9  | 5,3799  | -    | -       |
| FBgn0037513 | 153777_at   | CG3027  | pyd3      | -                                                                                                                                                                                                                                                                   | - | -    | -       | 1,6  | 3,1121  |
| FBgn0037548 | 149474_at   | CG7900  | -         | fatty acid amide hydrolase activity                                                                                                                                                                                                                                 | - | 3,7  | 9,6209  | 4,6  | 8,6606  |
| FBgn0037564 | 149479_at   | CG31463 | -         | -                                                                                                                                                                                                                                                                   | - | 2,8  | 3,7716  | -    | -       |
| FBgn0037607 | 153373_at   | CG8036  | -         | transketolase activity                                                                                                                                                                                                                                              | - | 1,8  | 3,8726  | 13,6 | 9,2773  |
| FBgn0037635 | 149528_at   | CG9837  | -         | -                                                                                                                                                                                                                                                                   | - | -    | -       | 1,6  | 3,8379  |
| FBgn0037664 | 154972_at   | CG8420  | -         | -                                                                                                                                                                                                                                                                   | - | -    | -       | 3,6  | 5,2766  |
| FBgn0037699 | 154821_at   | CG8147  | -         | alkaline phosphatase activity / nucleotide phosphatase activity                                                                                                                                                                                                     | - | 1,7  | 3,8316  | 1,9  | 4,3071  |
| FBgn0037739 | 149578_at   | CG12948 | -         | -                                                                                                                                                                                                                                                                   | - | 1,7  | 2,9635  | -    | -       |
| FBgn0037801 | 149624_at   | CG3999  | -         | -                                                                                                                                                                                                                                                                   | - | -    | -       | 2,0  | 2,9898  |
| FBgn0037872 | 149672_at   | CG31299 | nocturnin | nucleic acid binding                                                                                                                                                                                                                                                | - | 1,8  | 3,5737  | 5,9  | 4,1956  |
| FBgn0037913 | 151826_at   | CG6783  | -         | carrier activity / fatty acid binding / tricarboxylate carrier activity                                                                                                                                                                                             | - | -    | -       | 2,2  | 3,0247  |
| FBgn0038009 | 149747_at   | CG17138 | -         | -                                                                                                                                                                                                                                                                   | - | 2,2  | 6,5751  | 2,3  | 5,7998  |
| FBgn0038010 | 149748_at   | CG11502 | svp       | ligand-dependent nuclear receptor activity / receptor activity / transcription factor activity                                                                                                                                                                      | - | 1,8  | 3,2315  | 4,0  | 6,8051  |
| FBgn0038027 | 149762_at   | CG4421  | GstD8     | glutathione peroxidase activity / glutathione transferase activity                                                                                                                                                                                                  | - | 1,8  | 4,3875  | 2,0  | 3,4815  |
| FBgn0038028 | 149763_at   | CG10035 | -         | -                                                                                                                                                                                                                                                                   | - | 2,4  | 3,8825  | 2,0  | 2,8003  |
| FBgn0038150 | 149840_at   | CG17045 | yellow-e3 | -                                                                                                                                                                                                                                                                   | - | 1,6  | 3,9142  | 4,0  | 4,9499  |
| FBgn0038198 | 149871_at   | CG3153  | -         | receptor binding                                                                                                                                                                                                                                                    | - | 1,7  | 5,14    | 1,6  | 4,1818  |
| FBgn0038353 | 149968_at   | CG3999  | -         | -                                                                                                                                                                                                                                                                   | - | -    | -       | 2,7  | 3,6431  |
| FBgn0038372 | 152020_at   | CG31150 | -         | -                                                                                                                                                                                                                                                                   | - | 1,7  | 3,3135  | -    | -       |
| FBgn0038465 | 152368_at   | CG8913  | -         | peroxidase activity                                                                                                                                                                                                                                                 | - | -    | -       | 2,5  | 6,0886  |
| FBgn0038511 | 150076_at   | CG5873  | -         | peroxidase activity                                                                                                                                                                                                                                                 | - | 2,7  | 6,6318  | 2,3  | 3,6015  |
| FBgn0038516 | 150080_at   | CG5840  | -         | pyrroline-5-carboxylate reductase activity                                                                                                                                                                                                                          | - | -    | -       | 4,6  | 4,9838  |
| FBgn0038632 | 150152_at   | CG14301 | -         | -                                                                                                                                                                                                                                                                   | - | 1,7  | 3,2818  | -    | -       |
| FBgn0038661 | 141483_at   | CG17836 | -         | protein dimerization activity                                                                                                                                                                                                                                       | - | -    | -       | 2,4  | 3,5499  |
| FBgn0038799 | 152929_at   | CG4288  | -         | high affinity inorganic phosphate:sodium symporter activity                                                                                                                                                                                                         | - | -    | -       | 2,4  | 2,8662  |
| FBgn0038914 | 150335_at   | CG17820 | fit       | -                                                                                                                                                                                                                                                                   | - | 7,3  | 6,3919  | 36,0 | 11,2103 |
| FBgn0038943 | 150352_at   | CG5391  | -         | -                                                                                                                                                                                                                                                                   | - | 1,7  | 2,8099  | 9,7  | 8,4843  |
| FBgn0038958 | 150360_at   | CG13857 | -         | -                                                                                                                                                                                                                                                                   | - | -    | -       | 4,6  | 6,6219  |
| FBgn0038959 | 150361_at   | CG13856 | -         | -                                                                                                                                                                                                                                                                   | - | 4,3  | 3,9526  | 9,8  | 5,5551  |
| FBgn0038969 | 150366_at   | CG31160 | -         | protein binding / transcription regulator activity                                                                                                                                                                                                                  | - | 11,9 | 13,6763 | 10,1 | 10,7859 |
| FBgn0038970 | 150367_at   | CG31160 | -         | protein binding / transcription regulator activity                                                                                                                                                                                                                  | - | -    | -       | 2,2  | 4,1714  |
| FBgn0038971 | 150368_at   | CG13845 | -         | -                                                                                                                                                                                                                                                                   | - | 1,6  | 3,0531  | -    | -       |
| FBgn0038981 | 142586_at   | CG5346  | -         | -                                                                                                                                                                                                                                                                   | - | 2,0  | 3,6481  | 3,4  | 6,3525  |
| FBgn0039094 | 154671_at   | CG10184 | -         | -                                                                                                                                                                                                                                                                   | - | -    | -       | 2,2  | 3,4849  |
| FBgn0039102 | 153098_at   | CG16705 | -         | monophenol monooxygenase activator activity / trypsin activity / trypsin activity                                                                                                                                                                                   | - | 2,3  | 3,9316  | 3,9  | 4,6565  |
| FBgn0039154 | 141409_at   | CG6164  | -         | -                                                                                                                                                                                                                                                                   | - | -    | -       | 4,8  | 7,1938  |
| FBgn0039237 | 150531_at   | CG13640 | -         | -                                                                                                                                                                                                                                                                   | - | 5,3  | 4,8391  | 6,6  | 8,4993  |
| FBgn0039249 | 154181_at   | CG11168 | -         | receptor binding / receptor signaling protein activity                                                                                                                                                                                                              | - | 7,6  | 6,3097  | 15,9 | 11,7929 |
| FBgn0039464 | 152255_at   | CG6330  | -         | uridine phosphorylase activity                                                                                                                                                                                                                                      | - | -    | -       | 2,8  | 3,1991  |
| FBgn0039593 | 150780_at   | CG9989  | -         | -                                                                                                                                                                                                                                                                   | - | -    | -       | 1,7  | 3,7996  |
| FBgn0039594 | 153864_at   | CG9990  | -         | ATPase activity, coupled to transmembrane movement of substances / transporter activity                                                                                                                                                                             | - | 1,6  | 3,1403  | -    | -       |
| FBgn0039704 | 152879_at   | CG7802  | -         | -                                                                                                                                                                                                                                                                   | - | -    | -       | 2,0  | 3,4415  |
| FBgn0039754 | 152137_at   | CG9747  | -         | acyl-CoA delta11-desaturase activity                                                                                                                                                                                                                                | - | 2,4  | 6,0705  | 1,7  | 3,4296  |
| FBgn0039800 | 142413_at   | CG11314 | -         | -                                                                                                                                                                                                                                                                   | - | -    | -       | 2,0  | 3,1638  |
|             |             |         |           |                                                                                                                                                                                                                                                                     |   | 2,3  | 5,0069  | 4,2  | 10,2432 |

|             |             |         |      |                                                                                 |  |      |         |      |         |
|-------------|-------------|---------|------|---------------------------------------------------------------------------------|--|------|---------|------|---------|
| FBgn0039882 | 142134_at   | CG11576 | -    | -                                                                               |  | 1,7  | 3,5878  | 2,0  | 4,1742  |
| FBgn0039884 | 153488_at   | CG31000 | heph | poly-pyrimidine tract binding / pre-mRNA splicing factor activity / RNA binding |  | 1,6  | 2,8431  | -    | -       |
| FBgn0040611 | 151096_i_at | CG31062 | side |                                                                                 |  | 2,0  | 4,259   | 2,4  | 3,1797  |
| FBgn0040653 | 151137_r_at | CG15231 | IM4  |                                                                                 |  | -    | -       | 3,1  | 9,6327  |
| FBgn0040734 | 151209_at   | CG15065 | -    |                                                                                 |  | -    | -       | 3,5  | 7,8238  |
| FBgn0040736 | 151211_at   | CG16844 | IM3  |                                                                                 |  | 29,8 | 20,5736 | 88,7 | 23,5371 |
| FBgn0040790 | 151261_at   | CG13695 | gk   |                                                                                 |  | -    | -       | 1,8  | 2,9548  |
| FBgn0040796 | 151266_at   | CG13064 | -    |                                                                                 |  | 4,2  | 6,7984  | 2,6  | 7,5521  |
| FBgn0040984 | 151444_at   | CG4440  | -    |                                                                                 |  | -    | -       | 1,5  | 3,1799  |
| FBgn0040995 | 151453_at   | CG12508 | -    |                                                                                 |  | -    | -       | 2,6  | 3,5406  |

## Downregulated genes:

| FB code     | Affy identifier | CG numbers | Synonyms   | Description / Molecular function                                                                                                                                          | Fold Change st11 | t-value st11 | Fold change st12 | t-value st12 |
|-------------|-----------------|------------|------------|---------------------------------------------------------------------------------------------------------------------------------------------------------------------------|------------------|--------------|------------------|--------------|
| FBgn0000014 | 143052_at       | CG10325    | abd-A      | specific RNA polymerase II transcription factor activity                                                                                                                  | -1,7             | -4,3296      | -1,8             | -3,0241      |
| FBgn0000015 | 143053_at       | CG11648    | Abd-B      | specific RNA polymerase II transcription factor activity                                                                                                                  | -2,4             | -8,9175      | -2,7             | -7,0089      |
| FBgn0000095 | 142814_at       | CG1028     | Antp       | specific RNA polymerase II transcription factor activity                                                                                                                  | -1,7             | -3,0237      | -                | -            |
| FBgn0000114 | 151653_at       | CG31762    | aret       | mRNA 3'-UTR binding / protein binding / RNA binding / RNA binding                                                                                                         | -1,5             | -3,1194      | -                | -            |
| FBgn0000157 | 143081_at       | CG3629     | Dll        | specific RNA polymerase II transcription factor activity                                                                                                                  | -1,8             | -2,9039      | -                | -            |
| FBgn0000299 | 153378_at       | CG4145     | Cg25C      | extracellular matrix structural constituent / structural molecule activity                                                                                                | -                | -            | -2,2             | -5,2844      |
| FBgn0000337 | 143103_at       | CG1555     | cn         | -                                                                                                                                                                         | -3,2             | -5,1073      | -1,9             | -3,5495      |
| FBgn0000411 | 143116_at       | CG5893     | D          | DNA bending activity / transcription factor activity                                                                                                                      | -2,3             | -5,7145      | -2,6             | -4,8995      |
| FBgn0000439 | 143122_at       | CG2189     | Dfd        | RNA polymerase II transcription factor activity / transcription factor activity                                                                                           | -1,7             | -4,5173      | -                | -            |
| FBgn0000659 | 143160_at       | CG10002    | fkh        | specific RNA polymerase II transcription factor activity / transcription regulator activity                                                                               | -1,6             | -2,8378      | -                | -            |
| FBgn0001145 | 143181_at       | CG1743     | Gs2        | glutamate-ammonia ligase activity                                                                                                                                         | -2,4             | -4,5524      | -2,5             | -4,9317      |
| FBgn0001148 | 143183_at       | CG3388     | gsb        | specific RNA polymerase II transcription factor activity                                                                                                                  | -2,2             | -6,3702      | -1,9             | -4,2081      |
| FBgn0001168 | 143186_at       | CG6494     | h          | general transcriptional repressor activity / specific RNA polymerase II transcription factor activity / specific transcriptional repressor activity                       | -1,9             | -4,2068      | -                | -            |
| FBgn0001224 | 153583_at       | CG4463     | Hsp23      | actin binding                                                                                                                                                             | -2,6             | -4,3716      | -                | -            |
| FBgn0001226 | 153307_at       | CG4466     | Hsp27      | -                                                                                                                                                                         | -1,5             | -3,9231      | -1,7             | -3,0371      |
| FBgn0001235 | 143199_at       | CG17117    | hth        | specific RNA polymerase II transcription factor activity / transcription factor activity                                                                                  | -2,5             | -7,4838      | -4,3             | -9,7778      |
| FBgn0002561 | 143237_at       | CG3839     | l(l)sc     | specific RNA polymerase II transcription factor activity / transcription factor activity                                                                                  | -2,1             | -4,828       | -                | -            |
| FBgn0002741 | 143263_at       | CG17927    | Mhc        | ATPase activity, coupled / cytoskeletal protein binding / microfilament motor activity / structural constituent of cytoskeleton / structural constituent of muscle        | -                | -            | -1,7             | -3,3823      |
| FBgn0002772 | 143264_at       | CG5596     | Mlc1       | ATPase activity, coupled / microfilament motor activity / NOT calcium ion binding                                                                                         | -                | -            | -1,6             | -3,9241      |
| FBgn0002773 | 143265_at       | CG2184     | Mlc2       | ATPase activity, coupled / calcium ion binding / calmodulin binding / microfilament motor activity                                                                        | -1,6             | -3,1784      | -2,1             | -7,2228      |
| FBgn0002789 | 143271_at       | CG4696     | Mp20       | actin binding / calcium ion binding / structural constituent of cytoskeleton                                                                                              | -1,7             | -2,9359      | -2,5             | -5,9318      |
| FBgn0002868 | 143276_at       | CG9470     | MtnA       | metal ion binding                                                                                                                                                         | -                | -            | -2,6             | -7,2343      |
| FBgn0003057 | 143296_at       | CG10598    | -          | -                                                                                                                                                                         | -                | -            | -2,7             | -6,0364      |
| FBgn0003089 | 143305_at       | CG9614     | pip        | heparin-sulfate 2-sulfotransferase activity / sulfotransferase activity                                                                                                   | -                | -            | -1,6             | -3,0734      |
| FBgn0003149 | 152555_at       | CG5939     | Prm        | cytoskeletal protein binding / motor activity / structural constituent of cytoskeleton / structural constituent of muscle                                                 | -                | -            | -2,0             | -4,6613      |
| FBgn0003326 | 143333_at       | CG17579    | sca        | receptor binding / signal transducer activity                                                                                                                             | -2,3             | -5,0606      | -                | -            |
| FBgn0003411 | 143353_at       | CG1641     | sisA       | protein heterodimerization activity / transcription factor activity                                                                                                       | -                | -            | -2,1             | -3,9704      |
| FBgn0003430 | 151981_at       | CG16738    | slp1       | RNA polymerase II transcription factor activity / transcription factor activity                                                                                           | -2,2             | -4,7153      | -3,2             | -3,8437      |
| FBgn0003447 | 143355_at       | CG32858    | sn         | actin binding / structural constituent of cytoskeleton                                                                                                                    | -1,6             | -2,8573      | -2,1             | -4,3152      |
| FBgn0003448 | 143356_at       | CG3956     | sna        | DNA binding / RNA polymerase II transcription factor activity / specific RNA polymerase II transcription factor activity / specific transcriptional repressor activity    | -                | -            | -1,6             | -3,4903      |
| FBgn0003499 | 143365_at       | CG7847     | sr         | RNA polymerase II transcription factor activity                                                                                                                           | -                | -            | -2,1             | -3,0164      |
| FBgn0003944 | 143400_at       | CG10388    | Ubx        | DNA binding / specific RNA polymerase II transcription factor activity / transcription factor activity                                                                    | -5,6             | -10,4478     | -2,7             | -6,289       |
| FBgn0004009 | 143414_at       | CG4889     | wg         | frizzled-2 binding / morphogen activity / Notch binding / receptor binding / signal transducer activity                                                                   | -2,5             | -3,4453      | -2,8             | -3,5678      |
| FBgn0004102 | 143425_at       | CG12154    | oc         | transcription factor activity                                                                                                                                             | -1,9             | -2,9016      | -                | -            |
| FBgn0004169 | 142555_at       | CG7107     | up         | tropomyosin binding                                                                                                                                                       | -                | -            | -2,1             | -4,3178      |
| FBgn0004228 | 143441_at       | CG7936     | mex1       | -                                                                                                                                                                         | -                | -            | -2,1             | -2,9119      |
| FBgn0004425 | 143464_f_at     | CG1179     | LysB       | chitinase activity / lysozyme activity                                                    | -2,0             | -5,362       | -                | -            |
| FBgn0004427 | 143466_f_at     | CG9118     | LysD       | chitinase activity / lysozyme activity                                                    | -2,8             | -6,3117      | -1,8             | -3,2188      |
| FBgn0004428 | 143467_f_at     | CG1180     | LysE       | chitinase activity / lysozyme activity                                                    | -3,5             | -7,4258      | -                | -            |
| FBgn0004862 | 143523_at       | CG7902     | bap        | DNA binding / specific RNA polymerase II transcription factor activity                                                                                                    | -1,8             | -4,8256      | -                | -            |
| FBgn0004878 | 154755_at       | CG2102     | cas        | DNA binding / RNA polymerase II transcription factor activity / transcription factor activity                                                                             | -2,2             | -6,9415      | -1,6             | -3,1797      |
| FBgn0004898 | 143532_at       | CG11922    | fd96Cb     | transcription factor activity                                                                                                                                             | -2,1             | -4,4938      | -                | -            |
| FBgn0005775 | 152589_at       | CG7503     | Con        | structural molecule activity                                                                                                                                              | -2,4             | -3,4427      | -                | -            |
| FBgn0010359 | 143603_i_at     | CG30028    | gammaTry   | NOT serine-type endopeptidase activity / trypsin activity / trypsin activity                                                                                              | -                | -            | -5,5             | -5,5341      |
| FBgn0010387 | 143608_at       | CG8627     | Dbi        | acyl-CoA binding / carrier activity / diazepam binding / enzyme inhibitor activity                                                                                        | -                | -            | -2,2             | -3,6361      |
| FBgn0010423 | 143622_at       | CG9073     | TpnC47D    | calcium ion binding / calmodulin binding                                                                                                                                  | -2,1             | -3,0901      | -2,6             | -6,3676      |
| FBgn0010425 | 143624_at       | CG18681    | epsilonTry | trypsin activity                                                                                                                                                          | -                | -            | -2,0             | -3,0029      |
| FBgn0010433 | 143626_at       | CG7508     | ato        | DNA binding / transcription factor activity                                                                                                                               | -2,8             | -4,9364      | -                | -            |
| FBgn0011828 | 152747_at       | CG12002    | Pxn        | peroxidase activity                                                                                                                                                       | -                | -            | -2,8             | -4,2375      |
| FBgn0013772 | 142189_at       | CG10248    | Cyp6a8     | electron transporter activity / oxidoreductase activity                                                                                                                   | -                | -            | -1,9             | -4,3579      |
| FBgn0014141 | 141641_at       | CG3937     | cher       | actin binding / structural constituent of cytoskeleton                                                                                                                    | -3,2             | -7,0108      | -1,9             | -3,7319      |
| FBgn0014179 | 143754_at       | CG12245    | gcm        | DNA binding / transcription factor activity                                                                                                                               | -1,9             | -5,6151      | -1,9             | -3,6967      |
| FBgn0014343 | 143756_at       | CG10601    | mirr       | protein binding / transcription factor activity / transcriptional activator activity                                                                                      | -1,9             | -2,9853      | -                | -            |
| FBgn0014388 | 143757_at       | CG1921     | sty        | receptor binding                                                                                                                                                          | -                | -            | -1,5             | -3,0268      |
| FBgn0014863 | 143769_at       | CG1019     | Mlp84B     | protein binding                                                                                                                                                           | -                | -            | -1,9             | -3,5437      |
| FBgn0015286 | 143790_at       | CG2849     | Rala       | GTPase activity                                                                                                                                                           | -                | -            | -1,8             | -3,4566      |
| FBgn0015766 | 155091_at       | CG10596    | Msr-110    | -                                                                                                                                                                         | -                | -            | -2,6             | -4,2057      |
| FBgn0015774 | 151503_at       | CG10521    | NetB       | structural molecule activity / structural molecule activity                                                                                                               | -2,0             | -3,1125      | -1,9             | -3,2816      |
| FBgn0016075 | 143868_at       | CG16858    | vkq        | extracellular matrix structural constituent                                                                                                                               | -                | -            | -3,3             | -2,8049      |
| FBgn0019643 | 152456_at       | CG3318     | Dat        | aralkylamine N-acetyltransferase activity / arylamine N-acetyltransferase activity / cocaine binding / dopamine transporter activity / dopamine:sodium symporter activity | -                | -            | -1,7             | -3,6812      |
| FBgn0019650 | 152583_at       | CG11186    | toy        | specific RNA polymerase II transcription factor activity                                                                                                                  | -2,1             | -4,027       | -                | -            |
| FBgn0020299 | 142813_at       | CG31317    | stumps     | -                                                                                                                                                                         | -                | -            | -2,1             | -4,1877      |
| FBgn0020307 | 143919_at       | CG5799     | dve        | AT DNA binding / transcription factor activity                                                                                                                            | -                | -            | -2,2             | -4,2279      |
| FBgn0020378 | 143922_at       | CG1343     | Sp1        | RNA polymerase II transcription factor activity                                                                                                                           | -3,4             | -4,0077      | -2,2             | -3,5998      |
| FBgn0020389 | 154327_at       | CG8363     | Paps       | nucleotide kinase activity                                                                                                                                                | -1,6             | -3,539       | -3,2             | -9,4085      |
| FBgn0020637 | 143935_s_at     | CG10534    | Lcp65Aq2   | structural constituent of larval cuticle (sensu Insecta) / structural constituent of larval cuticle (sensu Insecta)                                                       | -2,6             | -6,893       | -3,1             | -11,4335     |
| FBgn0022213 | 143953_at       | CG13281    | Cas        | importin-alpha export receptor activity                                                                                                                                   | -1,8             | -3,0936      | -                | -            |
| FBgn0023549 | 144005_at       | CG3456     | Mct1       | monocarboxylic acid transporter activity                                                                                                                                  | -                | -            | -1,8             | -3,2462      |
| FBgn0024988 | 141607_at       | CG14801    | -          | exonuclease activity / exonuclease activity / nucleic acid binding                                                                                                        | -2,8             | -5,4705      | -                | -            |
| FBgn0025878 | 151901_at       | CG10382    | wrapper    | -                                                                                                                                                                         | -                | -            | -2,3             | -6,555       |
| FBgn0025885 | 153296_at       | CG11143    | Inos       | -                                                                                                                                                                         | -1,9             | -4,2801      | -1,7             | -4,2283      |
| FBgn0027111 | 144176_at       | CG1221     | miple      | -                                                                                                                                                                         | -1,6             | -3,7831      | -                | -            |
| FBgn0027527 | 144185_at       | CG1151     | Osi6       | -                                                                                                                                                                         | -                | -            | -1,8             | -3,2962      |
| FBgn0027560 | 152201_at       | CG4104     | Tps1       | alpha,alpha-trehalose-phosphate synthase (UDP-forming) activity                                                                                                           | -1,9             | -3,7442      | -                | -            |
| FBgn0027570 | 152128_at       | CG9761     | Nep2       | endothelin-converting enzyme activity / metalloendopeptidase activity / metallopeptidase activity                                                                         | -                | -            | -1,7             | -3,6473      |
| FBgn0027594 | 151918_s_at     | CG2086     | drpr       | extracellular matrix structural constituent / receptor activity                                                                                                           | -                | -            | -1,6             | -3,8814      |
| FBgn0028516 | 144224_at       | CG3994     | -          | metal ion transporter activity / zinc ion transporter activity                                                                                                            | -                | -            | -2,3             | -5,8786      |
| FBgn0028855 | 144266_at       | CG15282    | -          | -                                                                                                                                                                         | -                | -            | -2,1             | -3,3402      |
| FBgn0028876 | 144283_at       | CG16876    | -          | -                                                                                                                                                                         | -                | -            | -1,8             | -3,4049      |
| FBgn0028905 | 144302_at       | CG32972    | -          | -                                                                                                                                                                         | -3,5             | -12,8841     | -4,9             | -8,7308      |
| FBgn0029576 | 151685_r_at     | CG32813    | -          | -                                                                                                                                                                         | -                | -            | -1,7             | -2,8171      |
| FBgn0029939 | 153744_at       | CG9650     | -          | transcription regulator activity                                                                                                                                          | -2,1             | -5,4826      | -1,6             | -2,8373      |
| FBgn0030040 | 144700_at       | CG15347    | -          | -                                                                                                                                                                         | -                | -            | -2,6             | -4,4112      |
| FBgn0030186 | 154400_at       | CG2962     | -          | -                                                                                                                                                                         | -                | -            | -2,2             | -4,1689      |
| FBgn0030237 | 144829_at       | CG15209    | -          | -                                                                                                                                                                         | -                | -            | -2,0             | -6,0501      |
| FBgn0030390 | 144937_at       | CG15731    | -          | -                                                                                                                                                                         | -                | -            | -3,0             | -4,6124      |
| FBgn0030650 | 141692_at       | CG33206    | l(1)G0168  | -                                                                                                                                                                         | -1,9             | -4,825       | -2,2             | -5,0016      |
| FBgn0030653 | 153970_at       | CG7860     | -          | asparaginase activity                                                                                                                                                     | -                | -            | -2,9             | -5,2277      |
| FBgn0030818 | 145228_at       | CG8936     | Arpc3B     | actin binding / structural constituent of cytoskeleton                                                                                                                    | -                | -            | -1,5             | -3,1956      |
| FBgn0030825 | 155011_at       | CG32563    | -          | -                                                                                                                                                                         | -                | -            | -2,5             | -4,1591      |
| FBgn0031489 | 145684_at       | CG17224    | -          | -                                                                                                                                                                         | -                | -            | -2,0             | -4,4468      |
| FBgn0031629 | 145779_at       | CG3244     | -          | -                                                                                                                                                                         | -                | -            | -1,7             | -2,9361      |
| FBgn0031645 | 151989_at       | CG3036     | -          | sodium:phosphate symporter activity                                                                                                                                       | -2,2             | -5,6637      | -                | -            |
| FBgn0031653 | 145795_at       | CG8871     | Jon25Biii  | elastase activity / serine-type peptidase activity                                                                                                                        | -                | -            | -3,1             | -6,5506      |
| FBgn0031706 | 145823_at       | CG6634     | nmr2       | transcription factor activity                                                                                                                                             | -1,9             | -3,239       | -1,7             | -3,5739      |
| FBgn0031717 | 141443_at       | CG6957     | Oscillin   | glucosamine-6-phosphate deaminase activity                                                                                                                                | -                | -            | -1,9             | -3,4877      |
| FBgn0031745 | 151809_at       | CG8965     | -          | -                                                                                                                                                                         | -2,6             | -5,4222      | -2,5             | -2,9961      |

|             |                           |         |            |                                                                                                                                                              |       |          |       |          |
|-------------|---------------------------|---------|------------|--------------------------------------------------------------------------------------------------------------------------------------------------------------|-------|----------|-------|----------|
| FBgn0031839 | 145915_at                 | CG31634 | Oatp26F    | organic anion transporter activity                                                                                                                           | -2,1  | -3,1461  | -1,6  | -3,2466  |
| FBgn0031936 | 145974_at                 | CG13794 | -          | -                                                                                                                                                            | -5,3  | -4,637   | -5,5  | -3,5577  |
| FBgn0032002 | 146014_at                 | CG8353  | -          | cytidine deaminase activity                                                                                                                                  | -1,9  | -4,8616  | -2,0  | -4,6351  |
| FBgn0032070 | 151713_at                 | CG18024 | SoxN       | transcription factor activity                                                                                                                                | -     | -        | -2,7  | -5,9445  |
| FBgn0032167 | 141658_at                 | CG5853  | -          | anion channel activity / ATPase activity, coupled to transmembrane movement of substances / transporter activity                                             | -     | -        | -3,2  | -6,0142  |
| FBgn0032263 | 141619_at                 | CG7400  | Fatp       | long-chain fatty acid transporter activity                                                                                                                   | -2,5  | -3,0958  | -1,9  | -4,355   |
| FBgn0032282 | 146181_at                 | CG7299  | -          | -                                                                                                                                                            | -     | -        | -2,3  | -4,9494  |
| FBgn0032283 | 146182_at                 | CG7296  | -          | -                                                                                                                                                            | -14,1 | -12,6622 | -17,7 | -15,3051 |
| FBgn0032284 | 146183_at                 | CG7294  | -          | -                                                                                                                                                            | -     | -        | -4,8  | -8,1064  |
| FBgn0032405 | 146269_at                 | CG14946 | -          | oxidoreductase activity                                                                                                                                      | -     | -        | -1,5  | -3,6922  |
| FBgn0032683 | 154571_at                 | CG10275 | -          | -                                                                                                                                                            | -     | -        | -1,8  | -3,043   |
| FBgn0032774 | 152759_at                 | CG17549 | -          | -                                                                                                                                                            | -     | -        | -1,5  | -3,2362  |
| FBgn0032803 | 146500_at                 | CG13082 | -          | -                                                                                                                                                            | -     | -        | -2,6  | -6,3409  |
| FBgn0032842 | 146530_at                 | CG13969 | bwa        | ceramidase activity                                                                                                                                          | -1,5  | -3,6327  | -     | -        |
| FBgn0032844 | 146532_at                 | CG10746 | fok        | -                                                                                                                                                            | -2,5  | -4,731   | -2,0  | -4,9698  |
| FBgn0033144 | 141404_at                 | CG12172 | Sprn43Aa   | serine-type endopeptidase inhibitor activity                                                                                                                 | -2,1  | -5,4925  | -     | -3,3041  |
| FBgn0033188 | 152715_at                 | CG1600  | -          | -                                                                                                                                                            | -     | -        | -2,0  | -6,2322  |
| FBgn0033205 | 141701_at                 | CG2064  | -          | oxidoreductase activity                                                                                                                                      | -1,6  | -3,1039  | -     | -        |
| FBgn0033275 | 146794_at                 | CG14756 | -          | -                                                                                                                                                            | -5,0  | -7,4526  | -57,1 | -22,8808 |
| FBgn0033367 | 142220_at                 | CG8193  | -          | monophenol monooxygenase activity                                                                                                                            | -3,7  | -7,7169  | -9,0  | -11,9043 |
| FBgn0033411 | 146880_at                 | CG8805  | wun2       | phosphatidate phosphatase activity                                                                                                                           | -     | -        | -2,0  | -4,1909  |
| FBgn0033446 | 152817_at                 | CG1648  | -          | -                                                                                                                                                            | -     | -        | -2,0  | -3,9146  |
| FBgn0033505 | 151736_at                 | CG18408 | CAP        | structural constituent of cytoskeleton / vinculin binding                                                                                                    | -2,6  | -3,9503  | -3,0  | -5,7005  |
| FBgn0033518 | 146946_s_at               | CG11765 | Prx2540-2  | antioxidant activity / antioxidant activity / non-selenium glutathione peroxidase activity / peroxidase activity / peroxidase activity / peroxidase activity | -2,0  | -7,7505  | -1,9  | -4,7074  |
| FBgn0033604 | 147002_at                 | CG9070  | -          | -                                                                                                                                                            | -5,7  | -5,3912  | -16,2 | -13,8853 |
| FBgn0033634 | 147022_at                 | CG7763  | -          | -                                                                                                                                                            | -1,9  | -3,3099  | -3,0  | -7,7229  |
| FBgn0033721 | 147084_at                 | CG13159 | -          | -                                                                                                                                                            | -25,8 | -11,9103 | -73,5 | -17,6485 |
| FBgn0033724 | 153425_at                 | CG8501  | -          | -                                                                                                                                                            | -     | -        | -2,8  | -5,3942  |
| FBgn0033764 | 152519_at                 | CG8776  | -          | carbon-monoxide oxygenase activity                                                                                                                           | -     | -        | -1,9  | -3,3879  |
| FBgn0033779 | 142416_at                 | CG3814  | -          | N-methyl-D-aspartate selective glutamate receptor activity                                                                                                   | -     | -        | -2,4  | -4,2181  |
| FBgn0034083 | 153986_at                 | CG8434  | lbk        | -                                                                                                                                                            | -1,7  | -3,0963  | -     | -        |
| FBgn0034108 | 155081_at                 | CG3767  | Jhi-26     | -                                                                                                                                                            | -2,2  | -3,3568  | -2,3  | -5,7929  |
| FBgn0034117 | 153785_at                 | CG7997  | -          | -                                                                                                                                                            | -2,8  | -7,4256  | -4,9  | -8,923   |
| FBgn0034201 | 147355_at                 | CG17290 | -          | -                                                                                                                                                            | -     | -        | -2,9  | -3,609   |
| FBgn0034204 | 147358_at                 | CG10953 | -          | -                                                                                                                                                            | -1,6  | -4,3121  | -2,6  | -4,2122  |
| FBgn0034224 | 147366_at                 | CG6520  | -          | -                                                                                                                                                            | -1,7  | -3,6365  | -1,9  | -4,2396  |
| FBgn0034294 | 147409_at                 | CG5765  | -          | -                                                                                                                                                            | -     | -        | -4,2  | -6,1543  |
| FBgn0034337 | 147436_at                 | CG17524 | GstE3      | glutathione transferase activity                                                                                                                             | -     | -        | -1,5  | -3,6401  |
| FBgn0034404 | 142196_at                 | CG15101 | Jheh1      | -                                                                                                                                                            | -     | -        | -2,3  | -3,187   |
| FBgn0034406 | 154747_at                 | CG15106 | Jheh3      | epoxide hydrolase activity / juvenile hormone epoxide hydrolase activity                                                                                     | -     | -        | -2,1  | -4,0471  |
| FBgn0034589 | 151977_at                 | CG9398  | king-tubby | -                                                                                                                                                            | -1,5  | -2,9318  | -     | -        |
| FBgn0034698 | 141793_at                 | CG6698  | NtR        | -                                                                                                                                                            | -2,9  | -5,9085  | -4,7  | -5,2228  |
| FBgn0034764 | 147701_at                 | CG9952  | ppa        | -                                                                                                                                                            | -2,0  | -3,2038  | -     | -        |
| FBgn0035030 | 152422_at                 | CG3541  | -          | -                                                                                                                                                            | -2,0  | -4,4858  | -     | -        |
| FBgn0035091 | 152752_at                 | CG3829  | -          | scavenger receptor activity                                                                                                                                  | -     | -        | -1,8  | -5,4566  |
| FBgn0035147 | 154410_at                 | CG12030 | -          | UDP-glucose 4-epimerase activity                                                                                                                             | -1,6  | -2,7781  | -1,9  | -3,5686  |
| FBgn0035173 | 147949_at                 | CG13907 | -          | monocarboxylate porter activity                                                                                                                              | -1,6  | -5,145   | -1,7  | -2,884   |
| FBgn0035177 | 151651_at                 | CG13906 | nerfin-1   | RNA polymerase II transcription factor activity                                                                                                              | -     | -        | -1,9  | -3,2664  |
| FBgn0035190 | 147960_at                 | CG13913 | -          | -                                                                                                                                                            | -7,4  | -10,1993 | -4,1  | -9,144   |
| FBgn0035208 | 147969_at                 | CG9184  | -          | -                                                                                                                                                            | -8,6  | -18,7834 | -7,5  | -18,2179 |
| FBgn0035289 | 141428_at                 | CG12026 | -          | -                                                                                                                                                            | -1,7  | -3,7849  | -     | -        |
| FBgn0035551 | 148182_at                 | CG7465  | -          | -                                                                                                                                                            | -3,1  | -4,5903  | -10,7 | -11,1443 |
| FBgn0035583 | 148206_at                 | CG13704 | -          | -                                                                                                                                                            | -     | -        | -2,8  | -3,7252  |
| FBgn0035621 | 154354_at                 | CG10591 | -          | -                                                                                                                                                            | -3,1  | -4,9745  | -2,9  | -11,0251 |
| FBgn0035664 | 148253_at                 | CG6467  | Jon65Aiv   | chymotrypsin activity / serine-type endopeptidase activity                                                                                                   | -     | -        | -1,8  | -3,9415  |
| FBgn0035717 | 152709_at                 | CG10078 | Prat2      | -                                                                                                                                                            | -1,8  | -3,4532  | -     | -        |
| FBgn0035728 | 148296_at                 | CG18647 | -          | -                                                                                                                                                            | -2,4  | -3,7537  | -     | -        |
| FBgn0035735 | 148301_at                 | CG8640  | -          | structural constituent of cuticle (sensu Insecta)                                                                                                            | -     | -        | -1,7  | -3,3672  |
| FBgn0035763 | 154884_at                 | CG8602  | -          | transporter activity                                                                                                                                         | -     | -        | -1,5  | -3,7418  |
| FBgn0035767 | 152873_at                 | CG8596  | -          | transporter activity                                                                                                                                         | -     | -        | -1,6  | -3,5146  |
| FBgn0035922 | 148419_at                 | CG6486  | -          | peroxisome targeting signal-2 receptor activity                                                                                                              | -     | -        | -1,9  | -3,0345  |
| FBgn0035999 | 148467_at                 | CG3552  | -          | -                                                                                                                                                            | -2,1  | -3,3358  | -2,1  | -4,0359  |
| FBgn0036121 | 148546_at                 | CG6310  | -          | -                                                                                                                                                            | -     | -        | -2,6  | -4,4219  |
| FBgn0036182 | 153576_at                 | CG6084  | -          | aldehyde reductase activity                                                                                                                                  | -     | -        | -1,7  | -2,9959  |
| FBgn0036194 | 153715_at                 | CG11652 | -          | -                                                                                                                                                            | -1,6  | -2,9252  | -     | -        |
| FBgn0036283 | 152957_at                 | CG32103 | -          | carrier activity                                                                                                                                             | -1,7  | -3,8811  | -     | -        |
| FBgn0036355 | 148706_at                 | CG32120 | sens       | RNA polymerase II transcription factor activity / transcription factor activity                                                                              | -1,6  | -2,9459  | -     | -        |
| FBgn0036378 | 154590_at                 | CG12478 | bru-3      | RNA binding                                                                                                                                                  | -     | -        | -2,2  | -3,6358  |
| FBgn0036433 | 153786_at                 | CG9628  | -          | -                                                                                                                                                            | -     | -        | -1,6  | -3,1231  |
| FBgn0036486 | 148795_at                 | CG7003  | -          | damaged DNA binding                                                                                                                                          | -1,8  | -3,158   | -     | -        |
| FBgn0036494 | 153641_at                 | CG7250  | Toll-6     | transmembrane receptor activity / transmembrane receptor protein serine/threonine kinase activity                                                            | -1,6  | -5,1553  | -     | -        |
| FBgn0036501 | 148804_at                 | CG7272  | -          | -                                                                                                                                                            | -1,8  | -5,7822  | -1,8  | -4,4057  |
| FBgn0036539 | 148828_at                 | CG32150 | -          | -                                                                                                                                                            | -1,7  | -3,2229  | -     | -        |
| FBgn0036600 | 148873_at                 | CG13043 | -          | -                                                                                                                                                            | -     | -        | -1,6  | -3,4811  |
| FBgn0036787 | 148995_at                 | CG4306  | -          | -                                                                                                                                                            | -     | -        | -7,1  | -12,0936 |
| FBgn0036852 | 149033_at                 | CG9739  | fz2        | G-protein coupled receptor activity / transmembrane receptor activity / Wnt receptor activity / Wnt-protein binding                                          | -     | -        | -2,5  | -4,1061  |
| FBgn0036875 | 149052_at                 | CG9449  | -          | acid phosphatase activity                                                                                                                                    | -1,6  | -3,5177  | -4,8  | -11,6625 |
| FBgn0036898 | 151832_at                 | CG8782  | Oat        | ornithine-oxo-acid transaminase activity                                                                                                                     | -2,8  | -3,8436  | -3,2  | -9,5971  |
| FBgn0036945 | 141349_at                 | CG6981  | -          | -                                                                                                                                                            | -     | -        | -2,1  | -4,2588  |
| FBgn0037057 | 152050_at                 | CG10512 | -          | oxidoreductase activity                                                                                                                                      | -     | -        | -1,6  | -3,0581  |
| FBgn0037083 | 141375_at                 | CG5556  | -          | alkaline phosphatase activity / nucleotide phosphatase activity                                                                                              | -     | -        | -3,7  | -7,7569  |
| FBgn0037177 | 149244_at                 | CG14454 | -          | molecular_function unknown                                                                                                                                   | -1,5  | -3,3269  | -     | -        |
| FBgn0037224 | 153953_at                 | CG14639 | -          | -                                                                                                                                                            | -     | -        | -2,0  | -3,8822  |
| FBgn0037290 | 149305_at                 | CG1124  | -          | -                                                                                                                                                            | -     | -        | -3,6  | -6,1115  |
| FBgn0037723 | 152178_at                 | CG8327  | Spd5       | spermidine synthase activity                                                                                                                                 | -1,7  | -4,4261  | -     | -        |
| FBgn0037902 | 149688_at                 | CG5281  | -          | -                                                                                                                                                            | -1,6  | -2,8469  | -     | -        |
| FBgn0038034 | 149768_s_at               | CG17875 | Cyp9f3Ψ    | electron transporter activity / nucleic acid binding / oxidoreductase activity                                                                               | -     | -        | -3,7  | -5,9171  |
| FBgn0038037 | 153031_at                 | CG11466 | Cyp9f2     | electron transporter activity / nucleic acid binding / oxidoreductase activity                                                                               | -     | -        | -5,9  | -7,3985  |
| FBgn0038059 | 149782_at                 | CG6489  | Hsp70Bc    | -                                                                                                                                                            | -     | -        | -2,1  | -4,9711  |
| FBgn0038081 | 142746_at                 | CG10120 | Men        | carboxy-lyase activity / malate dehydrogenase (oxaloacetate-decarboxylating) (NADP+) activity                                                                | -     | -        | -1,8  | -4,6088  |
| FBgn0038126 | 154850_at                 | CG8483  | -          | -                                                                                                                                                            | -     | -        | -1,9  | -4,6178  |
| FBgn0038194 | 152120_at                 | CG3050  | Cyp6d5     | electron transporter activity / oxidoreductase activity                                                                                                      | -3,0  | -6,2175  | -5,7  | -7,9749  |
| FBgn0038321 | 152123_at                 | CG6218  | -          | carbohydrate kinase activity / kinase activity                                                                                                               | -1,8  | -3,1728  | -1,8  | -3,0819  |
| FBgn0038408 | 150002_at                 | CG6889  | tara       | -                                                                                                                                                            | -1,9  | -3,6323  | -1,7  | -3,0337  |
| FBgn0038413 | 141589_at                 | CG6725  | Sulf1      | N-acetylglucosamine-6-sulfatase activity                                                                                                                     | -1,6  | -3,9648  | -     | -        |
| FBgn0038563 | 152336_at                 | CG7780  | DNasell    | -                                                                                                                                                            | -4,5  | -12,3985 | -3,1  | -6,3489  |
| FBgn0038647 | 150161_at                 | CG14302 | -          | -                                                                                                                                                            | -     | -        | -1,7  | -4,1626  |
| FBgn0038973 | 150369_at                 | CG18594 | -          | kinase inhibitor activity / kinase regulator activity                                                                                                        | -     | -        | -1,9  | -4,7751  |
| FBgn0038982 | 142587_at                 | CG33093 | -          | gibberellin 20-oxidase activity                                                                                                                              | -     | -        | -1,6  | -4,2697  |
| FBgn0039052 | 150424_at                 | CG6733  | -          | NOT aminoacylase activity                                                                                                                                    | -     | -        | -2,3  | -4,3332  |
| FBgn0039098 | 142671_at                 | CG13822 | -          | -                                                                                                                                                            | -2,2  | -3,7166  | -1,9  | -3,0675  |
| FBgn0039434 | 150663_r_at / 150662_i_at | CG5468  | -          | -                                                                                                                                                            | -     | -        | -1,8  | -4,7636  |
| FBgn0039436 | 150665_s_at               | CG6478  | -          | -                                                                                                                                                            | -6,5  | -6,4832  | -4,0  | -9,608   |
| FBgn0039441 | 150670_i_at / 150671_f_at | CG5476  | -          | -                                                                                                                                                            | -2,2  | -5,0894  | -2,2  | -6,5309  |
| FBgn0039539 | 154473_at                 | CG12880 | -          | -                                                                                                                                                            | -     | -        | -4,3  | -3,9017  |
| FBgn0039559 | 150758_at                 | CG4976  | Mes-4      | histone methyltransferase activity / transcription cofactor activity / transcription factor binding                                                          | -1,7  | -3,2565  | -     | -        |
| FBgn0039586 | 142182_s_at               | CG33103 | Ppn        | metallopeptidase activity / serine-type endopeptidase inhibitor activity                                                                                     | -3,2  | -9,2947  | -4,4  | -9,7362  |
| FBgn0039643 | 153221_at                 | CG11886 | Slbp       | -                                                                                                                                                            | -1,8  | -3,9535  | -     | -        |
| FBgn0039678 | 150831_at                 | CG18111 | Obp99a     | odorant binding                                                                                                                                              | -2,6  | -9,0152  | -1,8  | -5,1789  |
| FBgn0039682 | 150834_at                 | CG7584  | Obp99c     | -                                                                                                                                                            | -     | -        | -1,9  | -4,6964  |
| FBgn0039686 | 150838_at                 | CG15506 | -          | -                                                                                                                                                            | -     | -        | -2,2  | -6,7783  |

|             |             |         |             |                                                                                                 |      |         |      |          |
|-------------|-------------|---------|-------------|-------------------------------------------------------------------------------------------------|------|---------|------|----------|
| FBgn0039777 | 150893_f_at | CG2229  | Jon99Fii    | elastase activity / NOT serine-type endopeptidase activity / serine-type endopeptidase activity | -    | -       | -5,9 | -7,4394  |
| FBgn0039778 | 141369_at   | CG18030 | Jon99Fi     | elastase activity / NOT serine-type endopeptidase activity / serine-type endopeptidase activity | -    | -       | -8,3 | -10,9738 |
| FBgn0039779 | 150894_at   | CG1546  | PH4alpha5G2 | procollagen-proline 4-dioxygenase activity                                                      | -    | -       | -2,3 | -3,9775  |
| FBgn0039825 | 152434_at   | CG31004 | -           | -                                                                                               | -    | -       | -2,9 | -3,6157  |
| FBgn0039873 | 150955_at   | CG2191  | -           | cation transporter activity / sodium-dependent multivitamin transporter activity                | -2,6 | -5,6158 | -    | -        |
| FBgn0040609 | 151094_at   | CG3348  | -           | -                                                                                               | -    | -       | -2,1 | -4,5843  |
| FBgn0040715 | 151192_at   | CG15386 | -           | -                                                                                               | -    | -       | -1,6 | -3,2055  |
| FBgn0040813 | 151287_at   | CG11051 | Nplp2       | -                                                                                               | -1,8 | -5,0897 | -2,0 | -4,7149  |
| FBgn0040827 | 151301_at   | CG13315 | -           | -                                                                                               | -    | -       | -1,6 | -5,4826  |
| FBgn0040865 | 151339_at   | CG15758 | -           | -                                                                                               | -    | -       | -2,0 | -4,1605  |
| FBgn0040942 | 151409_at   | CG12643 | -           | -                                                                                               | -    | -       | -1,7 | -2,9807  |
