# Supplementary material for: Comparative analysis of Hox downstream genes inDrosophila
Source: Oxford University Press journal article supplement (doi:10.1242/dev.02746), 2006-12-14
Supplement: dev02746tables7.pdf [file dev02746tables7.pdf]

Table S7. Predicted and conserved direct Dfd target genes

| Affy identifier | FB code     | CG numbers | Synonyms | Cluster length in bp | Conservation | # of species |
|-----------------|-------------|------------|----------|----------------------|--------------|--------------|
| 154125_at       | FBan0007590 | CG7590     | scyl     | 65                   | Y            | 5            |
| 148994_at       | FBan0013701 | CG13701    | skl      | 201                  | Y            | 5            |
| 145823_at       | FBan0006634 | CG6634     | nmr2     | 191                  | Y            | 5            |
| 154473_at       | FBan0012880 | CG12880    | -        | 228                  | Y            | 5            |
| 148302_at       | FBan0008638 | CG8638     | -        | 210                  | Y            | 5            |
| 147413_at       | FBan0005756 | CG5756     | -        | 202                  | Y            | 4            |
| 143414_at       | FBan0004889 | CG4889     | wg       | 182                  | Y            | 4            |
| 155150_at       | FBan0031305 | CG6783     | -        | 470                  | Y            | 4            |
| 153828_at       | FBan0015828 | CG15828    | -        | 190                  | Y            | 4            |
| 143409_at       | FBan0010037 | CG10037    | vvl      | 219                  | Y            | 4            |
| 141280_at       | FBan0010283 | CG10283    | -        | 267                  | Y            | 4            |
| 145584_at       | FBan0005481 | CG5481     | lea      | 411                  | Y            | 4            |
| 150684_at       | FBan0014247 | CG14247    | -        | 412                  | Y            | 4            |
| 145366_at       | FBan0012199 | CG12199    | kek5     | 313                  | Y            | 4            |
| 148796_at       | FBan0006878 | CG6878     | -        | 99                   | Y            | 4            |
| 149633_at       | FBan0014688 | CG14688    | -        | 207                  | Y            | 4            |
| 147022_at       | FBan0007763 | CG7763     | -        | 149                  | Y            | 4            |
| 149033_at       | FBan0009739 | CG9739     | fz2      | 183                  | Y            | 4            |
| 151691_at       | FBan0012063 | CG12063    | -        | 224                  | Y            | 4            |
| 142769_at       | FBan0011905 | CG11905    | -        | 314                  | Y            | 4            |
| 143271_at       | FBan0004696 | CG4696     | Mp20     | 347                  | Y            | 4            |
| 143680_at       | FBan0004319 | CG4319     | rpr      | 517                  | Y            | 4            |
| 154586_at       | FBan0012891 | CG12891    | CPTI     | 291                  | Y            | 4            |
| 151967_at       | FBan0006415 | CG6415     | -        | 237                  | Y            | 4            |
| 147367_at       | FBan0033006 | CG18431    | -        | 273                  | Y            | 4            |
| 141711_at       | FBan0016764 | CG33232    | -        | 174                  | Y            | 4            |
| 144266_at       | FBan0015282 | CG15282    | -        | 285                  | Y            | 4            |
| 153777_at       | FBan0003027 | CG3027     | pyd3     | 290                  | Y            | 4            |
| 143565_at       | FBan0010579 | CG10579    | Eip63E   | 247                  | Y            | 3            |
| 143051_at       | FBan0004807 | CG4807     | ab       | 377                  | Y            | 3            |
| 152709_at       | FBan0010078 | CG10078    | Prat2    | 301                  | Y            | 3            |
| 151193_f_at     | FBan0015380 | CG33516    | dpr3     | 91                   | Y            | 3            |
| 144143_at       | FBan0001780 | CG1780     | ldgf4    | 249                  | Y            | 3            |
| 149052_at       | FBan0009449 | CG9449     | -        | 324                  | Y            | 3            |
| 147126_i_at     | FBan0013324 | CG13324    | -        | 314                  | Y            | 3            |
| 146183_at       | FBan0007294 | CG7294     | -        | 220                  | Y            | 3            |
| 146182_at       | FBan0007296 | CG7296     | -        | 220                  | Y            | 3            |
| 143237_at       | FBan0003839 | CG3839     | l(1)sc   | 298                  | Y            | 3            |
| 148236_at       | FBan0010541 | CG10541    | Tektin-C | 371                  | Y            | 3            |
| 147193_at       | FBan0008589 | CG8589     | -        | 229                  | Y            | 3            |
| 153932_at       | FBan0005177 | CG5177     | -        | 296                  | Y            | 3            |
| 146794_at       | FBan0014756 | CG14756    | -        | 316                  | Y            | 3            |
| 154819_at       | FBan0002961 | CG2961     | -        | 434                  | Y            | 3            |
| 143790_at       | FBan0002849 | CG2849     | Rala     | 350                  | Y            | 3            |
| 154347_at       | FBan0009670 | CG9670     | fal      | 119                  | Y            | 3            |
| 152120_at       | FBan0003050 | CG3050     | Cyp6d5   | 197                  | Y            | 3            |
