# Supplementary material for: Comparative analysis of Hox downstream genes inDrosophila
Source: Oxford University Press journal article supplement (doi:10.1242/dev.02746), 2006-12-14
Supplement: dev02746tables8.pdf [file dev02746tables8.pdf]

**Table S8. Identified Dfd enhancer elements in the fz2, CG5657, wg, and Eip63E genes**

| Gene | Position enhancer | Chr | Binding site | Position | Dfd-binding sites | Sequence | Dfd-binding sites |
|------|-------------------|-----|--------------|----------|-------------------|----------|-------------------|
|------|-------------------|-----|--------------|----------|-------------------|----------|-------------------|

**fz2 D. melanogaster:**

|             |          |    |   |             |          |  |          |
|-------------|----------|----|---|-------------|----------|--|----------|
| 19192133... | 19192319 | 3L | 1 | 19192138... | 19192145 |  | TTAATTAA |
|             |          | 2  |   | 19192272... | 19192279 |  | TTAATTAA |
|             |          | 3  |   | 19192306... | 19192313 |  | TTAATTAC |

**D. simulans:**

|             |          |    |   |             |          |  |          |
|-------------|----------|----|---|-------------|----------|--|----------|
| 18527484... | 18527668 | 3L | 1 | 18527487... | 18527494 |  | TTAATTAA |
|             |          | 2  |   | 18527621... | 18527628 |  | TTAATTAA |
|             |          | 3  |   | 18527655... | 18527662 |  | TTAATTAC |

**D. yakuba:**

|             |          |    |   |             |          |  |          |
|-------------|----------|----|---|-------------|----------|--|----------|
| 21897025... | 21897204 | 3L | 1 | 21897027... | 21897034 |  | TTAATTAA |
|             |          | 2  |   | 21897161... | 21897168 |  | TTAATTAA |
|             |          | 3  |   | 21897195... | 21897202 |  | TTAATTAC |

**D. erecta:**

|             |          |            |  |             |          |  |          |
|-------------|----------|------------|--|-------------|----------|--|----------|
| 19033519... | 19033698 | scaffold 1 |  | 19033521... | 19033528 |  | TTAATTAA |
|             |          | 2          |  | 19033655... | 19033662 |  | TTAATTAA |
|             |          | 3          |  | 19033689... | 19033696 |  | TTAATTAC |

**CG56575 D. melanogaster:**

|             |          |    |   |             |          |  |          |
|-------------|----------|----|---|-------------|----------|--|----------|
| 13621316... | 13621527 | 2R | 1 | 13621321... | 13621328 |  | TCAATTAG |
|             |          | 2  |   | 13621423... | 13621430 |  | GCAATTAT |
|             |          | 3  |   | 13621440... | 13621447 |  | GTAATTAT |
|             |          | 4  |   | 13621506... | 13621513 |  | GCAATTAG |
|             |          | 5  |   | 13621514... | 13621521 |  | ATAATTAC |

**D. simulans:**

|             |          |    |   |             |          |  |          |
|-------------|----------|----|---|-------------|----------|--|----------|
| 12728704... | 12728916 | 2R | 1 | 12728709... | 12728716 |  | TCAATTAG |
|             |          | 2  |   | 12728812... | 12728819 |  | GCAATTAT |
|             |          | 3  |   | 12728829... | 12728836 |  | GTAATTAT |
|             |          | 4  |   | 12728895... | 12728902 |  | GCAATTAG |
|             |          | 5  |   | 12728903... | 12728910 |  | ACAATTAC |

**D. yakuba:**

|             |          |    |   |             |          |  |          |
|-------------|----------|----|---|-------------|----------|--|----------|
| 15284603... | 15284812 | 2R | 1 | 15284608... | 15284615 |  | TCAATTAG |
|             |          | 2  |   | 15284710... | 15284717 |  | GCAATTAT |
|             |          | 3  |   | 15284727... | 15284734 |  | GTAATTAT |
|             |          | 4  |   | 15284791... | 15284798 |  | GCAATTAG |

**D. erecta:**

|            |         |            |  |            |         |  |          |
|------------|---------|------------|--|------------|---------|--|----------|
| 8215019... | 8215228 | scaffold 1 |  | 8215024... | 8215031 |  | TCAATTAG |
|            |         | 2          |  | 8215126... | 8215133 |  | GCAATTAT |
|            |         | 3          |  | 8215143... | 8215150 |  | GTAATTAT |
|            |         | 4          |  | 8215207... | 8215214 |  | GCAATTAG |
|            |         | 5          |  | 8215215... | 8215222 |  | ACAATTAC |

**wg D. melanogaster:**

|            |         |     |   |            |         |  |              |
|------------|---------|-----|---|------------|---------|--|--------------|
| 7288376... | 7288484 | 2L  | 1 | 7288376... | 7288383 |  | TCAATTAG     |
|            |         | 2   |   | 7288457... | 7288464 |  | ATAATTAG     |
|            |         | 3/4 |   | 7288472... | 7288483 |  | CTAATTAATTAA |

**D. simulans:**

|            |         |     |   |            |         |  |              |
|------------|---------|-----|---|------------|---------|--|--------------|
| 7083812... | 7083920 | 2L  | 1 | 7083812... | 7083819 |  | TCAATTAG     |
|            |         | 2   |   | 7083893... | 7083900 |  | ATAATTAG     |
|            |         | 3/4 |   | 7083908... | 7083919 |  | CTAATTAATTAA |

**D. erecta:**

|             |          |            |  |             |          |  |              |
|-------------|----------|------------|--|-------------|----------|--|--------------|
| 16209833... | 16209941 | scaffold 1 |  | 16209833... | 16209840 |  | TCAATTAG     |
|             |          | 2          |  | 16209914... | 16209921 |  | ATAATTAG     |
|             |          | 3/4        |  | 16209929... | 16209940 |  | CTAATTAATTAA |

**Eip63E D. melanogaster:**

|            |         |    |   |            |         |  |          |
|------------|---------|----|---|------------|---------|--|----------|
| 3521487... | 3521640 | 3L | 1 | 3521492... | 3521499 |  | TTAATTAA |
|            |         | 2  |   | 3521608... | 3521615 |  | GTAATTAA |
|            |         | 3  |   | 3521627... | 3521634 |  | TTAATTAA |

**D. simulans:**

|            |         |    |   |            |         |  |          |
|------------|---------|----|---|------------|---------|--|----------|
| 3076069... | 3076221 | 3L | 1 | 3076073... | 3076080 |  | TTAATTAA |
|            |         | 2  |   | 3076189... | 3076196 |  | GTAATTAA |
|            |         | 3  |   | 3076208... | 3076215 |  | TTAATTAA |

**D. yakuba:**

|            |         |    |   |            |         |  |          |
|------------|---------|----|---|------------|---------|--|----------|
| 4165397... | 4165508 | 3L | 1 | 4165498... | 4165505 |  | TTAATTAA |
|            |         | 2  |   | 4165479... | 4165486 |  | GTAATTAA |

**D. erecta:**

|            |         |            |  |            |         |  |          |
|------------|---------|------------|--|------------|---------|--|----------|
| 6236768... | 6236888 | scaffold 1 |  | 6236879... | 6236886 |  | TTAATTAA |
|            |         | 2          |  | 6236860... | 6236867 |  | GTAATTAA |

Bold sequences show ATTA core sequence within each Dfd binding site.
